# Management of Diabetes and Hyperglycemia in Hospitals

STEPHEN CLEMENT MD, CDE<sup>1</sup>  
 SUSAN S. BRAITHWAITE, MD<sup>2</sup>  
 MICHELLE F. MAGEE, MD, CDE<sup>3</sup>  
 ANDREW AHMANN, MD<sup>4</sup>  
 ELIZABETH P. SMITH, RN, MS, CANP, CDE<sup>1</sup>

REBECCA G. SCHAFER, MS, RD, CDE<sup>5</sup>  
 IRL B. HIRSCH, MD<sup>6</sup>  
 ON BEHALF OF THE DIABETES IN HOSPITALS  
 WRITING COMMITTEE

**D**iabetes increases the risk for disorders that predispose individuals to hospitalization, including coronary artery, cerebrovascular and peripheral vascular disease, nephropathy, infection, and lower-extremity amputations. The management of diabetes in the hospital is generally considered secondary in importance compared with the condition that prompted admission. Recent studies (1,2) have focused attention to the possibility that hyperglycemia in the hospital is not necessarily a benign condition and that aggressive treatment of diabetes and hyperglycemia results in reduced mortality and morbidity. The purpose of this technical review is to evaluate the evidence relating to the management of hypergly-

cemia in hospitals, with particular focus on the issue of glycemic control and its possible impact on hospital outcomes. The scope of this review encompasses adult nonpregnant patients who do not have diabetic ketoacidosis or hyperglycemic crises.

For the purposes of this review, the following terms are defined (adapted from the American Diabetes Association [ADA] Expert Committee on the Diagnosis and Classification of Diabetes Mellitus) (3):

- Medical history of diabetes: diabetes has been previously diagnosed and acknowledged by the patient's treating physician.

- Unrecognized diabetes: hyperglycemia (fasting blood glucose  $\geq 126$  mg/dl or random blood glucose  $\geq 200$  mg/dl) occurring during hospitalization and confirmed as diabetes after hospitalization by standard diagnostic criteria, but unrecognized as diabetes by the treating physician during hospitalization.
- Hospital-related hyperglycemia: hyperglycemia (fasting blood glucose  $\geq 126$  mg/dl or random blood glucose  $\geq 200$  mg/dl) occurring during the hospitalization that reverts to normal after hospital discharge.

## What is the prevalence of diabetes in hospitals?

The prevalence of diabetes in hospitalized adult patients is not known. In the year 2000, 12.4% of hospital discharges in the U.S. listed diabetes as a diagnosis. The average length of stay was 5.4 days (4). Diabetes was the principal diagnosis in only 8% of these hospitalizations. The accuracy of using hospital discharge diagnosis codes for identifying patients with previously diagnosed diabetes has been questioned. Discharge diagnosis codes may underestimate the true prevalence of diabetes in hospitalized patients by as much as 40% (5,6). In addition to having a medical history of diabetes, patients presenting to hospitals may have unrecognized diabetes or hospital-related hyperglycemia. Umpierrez et al. (1) reported a 26% prevalence of known diabetes in hospitalized patients in a community teaching hospital. An additional 12% of patients had unrecognized diabetes or hospital-related hyperglycemia as defined above. Levetan et al. (6) reported a 13% prevalence of laboratory-documented hyperglycemia (blood glucose  $> 200$  mg/dl (11.1 mmol) in 1,034 consecutively hospitalized adult patients. Based on hospital chart review, 64% of patients with hyperglycemia had preexisting diabetes or were recognized as having new-onset diabetes during hospitalization. Thirty-six percent of the hyperglycemic patients remained unrecognized as having diabetes in the discharge summary, although diabetes or "hyperglycemia" was documented in

From the <sup>1</sup>Georgetown University Hospital, Washington, DC; the <sup>2</sup>University of North Carolina, Chapel Hill, North Carolina; <sup>3</sup>Medstar Research Institute at Washington Hospital Center, Washington, DC; the <sup>4</sup>Oregon Health and Science University, Portland, Oregon; the <sup>5</sup>VA Medical Center, Bay Pines, Florida; and the <sup>6</sup>University of Washington, Seattle, Washington.

Address correspondence and reprint requests to Dr. Stephen Clement, MD, Georgetown University Hospital, Department of Endocrinology, Bldg. D, Rm. 232, 4000 Reservoir Rd., NW, Washington, DC 20007. E-mail: clements@gunet.georgetown.edu..

Received and accepted for publication 1 August 2003.

S.C. has received honoraria from Aventis and Pfizer. S.S.B. has received honoraria from Aventis and research support from BMS. M.F.M. has been on advisory panels for Aventis; has received honoraria from Aventis, Pfizer, Bristol Myers Squibb, Takeda, and Lilly; and has received grant support from Aventis, Pfizer, Lilly, Takeda, Novo Nordisk, Bayer, GlaxoSmithKline, and Hewlett Packard. A.A. has received honoraria from Aventis, Bayer, BMS, GlaxoSmithKline, Johnson & Johnson, Lilly, Novo Nordisk, Pfizer, and Takeda and research support from Aventis, BMS, GlaxoSmithKline, Johnson & Johnson, Lilly, Novo Nordisk, Pfizer, Roche, and Takeda. E.P.S. holds stock in Aventis. I.B.H. has received consulting fees from Eli Lilly, Aventis, Novo Nordisk, and Becton Dickinson and grant support from Novo Nordisk.

Additional information for this article can be found in two online appendixes at <http://care.diabetesjournals.org>.

**Abbreviations:** ADA, American Diabetes Association; AMI, acute myocardial infarction; CDE, certified diabetes educator; CHF, congestive heart failure; CK, creatinine kinase; CQI, continuous quality improvement; CRP, C-reactive protein; CSII, continuous subcutaneous insulin infusion; CVD, cardiovascular disease; DIGAMI, Diabetes and Insulin-Glucose Infusion in Acute Myocardial Infarction; DSME, diabetes self-management education; DSWI, deep sternal wound infection; FFA, free fatty acid; GIK, glucose-insulin-potassium; ICAM, intercellular adhesion molecule; ICU, intensive care unit; IL, interleukin; IIT, intensive insulin therapy; JCAHO, Joint Commission of Accredited Hospital Organization; LIMP, lysosomal integral membrane protein; MCP, monocyte chemoattractant protein; MI, myocardial infarction; MRI, magnetic resonance imaging; MRS, magnetic resonance spectroscopy; NF, nuclear factor; NPO, nothing by mouth; PAI, plasminogen activator inhibitor; PCU, patient care unit; PKC, protein kinase C; PBM, peripheral blood mononuclear cell; PMN, polymorphonuclear leukocyte; ROS, reactive oxygen species; TNF, tumor necrosis factor; TPN, total parenteral nutrition; UKPDS, U.K. Prospective Diabetes Study.

A table elsewhere in this issue shows conventional and Système International (SI) units and conversion factors for many substances.

© 2004 by the American Diabetes Association.

the progress notes for one-third of these patients.

Norhammar et al. (7) studied 181 consecutive patients admitted to the coronary care units of two hospitals in Sweden with acute myocardial infarction (AMI), no diagnosis of diabetes, and a blood glucose  $<200$  mg/dl ( $<11.1$  mmol/l) on admission. A standard 75-g glucose tolerance test was done at discharge and again 3 months later. The authors found a 31% prevalence of diabetes at the time of hospital discharge and a 25% prevalence of diabetes 3 months after discharge in this group with no previous diagnosis of diabetes.

Using the A1C test may be a valuable case-finding tool for identifying diabetes in hospitalized patients. Greci et al. (8) reported that an A1C  $>6\%$  was 100% specific and 57% sensitive for identifying persons with diabetes in a small cohort of patients admitted through the emergency department of one hospital with a random blood glucose  $\geq 126$  mg/dl (7 mmol/l) and no prior history of diabetes.

From the patient's perspective, 24% of adult patients with known diabetes surveyed in 1989 reported being hospitalized at least once in the previous year (9). The risk for hospitalization increased with age, duration of diabetes, and number of diabetes complications. Persons with diabetes reported being hospitalized in the previous year three times more frequently compared with persons without diabetes. In summary, the prevalence of diabetes in hospitalized adults is conservatively estimated at 12.4–25%, depending on the thoroughness used in identifying patients.

## WHAT IS THE LINK BETWEEN HIGH BLOOD GLUCOSE AND POOR OUTCOMES? POSSIBLE MECHANISMS

The mechanism of harm from hyperglycemia on various cells and organ systems has been studied in *in vitro* systems and animal models. This research has centered on the immune system, mediators of inflammation, vascular responses, and brain cell responses.

### Hyperglycemia and immune function

The association of hyperglycemia and infection has long been recognized, although the overall magnitude of the problem is still somewhat unclear

(10,11). From a mechanistic point of view, the primary problem has been identified as phagocyte dysfunction. Studies have reported diverse defects in neutrophil and monocyte function, including adherence, chemotaxis, phagocytosis, bacterial killing, and respiratory burst (10–20). Bagdade et al. (14) were among the first to attach a glucose value to improvement in granulocyte function when they demonstrated significant improvement in granulocyte adherence as the mean fasting blood glucose was reduced from  $293 \pm 20$  to  $198 \pm 29$  mg/dl ( $16.3$ – $11$  mmol/l) in 10 poorly controlled patients with diabetes. Other investigators have demonstrated similar improvements in leukocyte function with treatment of hyperglycemia (17,21–23). *In vitro* trials attempting to define hyperglycemic thresholds found only rough estimates that a mean glucose  $>200$  mg/dl (11.1 mmol/l) causes leukocyte dysfunction (13,14,16,24–26).

Alexiewicz et al. (17) demonstrated elevated basal levels of cytosolic calcium in the polymorphonuclear leukocytes (PMNs) of patients with type 2 diabetes relative to control subjects. Elevated cytosolic calcium was associated with reduced ATP content and impaired phagocytosis. There was a direct correlation between PMN cytosolic calcium and fasting serum glucose. These were both inversely proportional to phagocytic activity. Glucose reduction with glyburide resulted in reduced cytosolic calcium, increased ATP content, and improved phagocytosis.

Classic microvascular complications of diabetes are caused by alterations in the aldose reductase pathway, AGE pathway, reactive oxygen species pathway, and the protein kinase C (PKC) pathway (rev. in 27). Several of these pathways may contribute to immune dysfunction. PKC may mediate the effect of hyperglycemia on neutrophil dysfunction (28). Liu et al. (29) found that decreased phagocytic activity in diabetic mice correlated inversely with the formation of AGEs, although a direct cause-and-effect relationship was not proven. Ortmeyer and Mohsenin (30) found that hyperglycemia caused impaired superoxide formation along with suppressed activation of phospholipase D. Reduced superoxide formation has been linked to leukocyte dysfunction. Another recent study found a link among hyperglycemia, inhibition of glucose-6-phosphate dehydrogenase, and reduced

superoxide production in isolated human neutrophils (31). Sato and colleagues (32–34) used chemiluminescence to evaluate neutrophil bactericidal function. The authors confirmed a relationship between hyperglycemia and reduced superoxide formation in neutrophils. This defect was improved after treatment with an aldose reductase inhibitor. This finding suggests that increased activity of the aldose reductase pathway makes a significant contribution to the incidence of diabetes-related bacterial infections.

Laboratory evidence of the effect of hyperglycemia on the immune system goes beyond the granulocyte. Nonenzymatic glycation of immunoglobulins has been reported (35). Normal individuals exposed to transient glucose elevation show rapid reduction in lymphocytes, including all lymphocyte subsets (36). In patients with diabetes, hyperglycemia is similarly associated with reduced T-cell populations for both CD-4 and CD-8 subsets. These abnormalities are reversed when glucose is lowered (37).

In summary, studies evaluating the effect of hyperglycemia on the immune system comprise small groups of normal individuals, patients with diabetes of various duration and types, and animal studies. These studies consistently show that hyperglycemia causes immunosuppression. Reduction of glucose by a variety of means reverses the immune function defects.

### Hyperglycemia and the cardiovascular system

Acute hyperglycemia has numerous effects on the cardiovascular system. Hyperglycemia impairs ischemic preconditioning, a protective mechanism for ischemic insult (38). Concomitantly, infarct size increases in the setting of hyperglycemia. The same investigators demonstrated reduced coronary collateral blood flow in the setting of moderately severe hyperglycemia (39). Acute hyperglycemia may induce cardiac myocyte death through apoptosis (40) or by exaggerating ischemia-reperfusion cellular injury (41).

Other vascular consequences of acute hyperglycemia relevant to inpatient outcomes include blood pressure changes, catecholamine elevations, platelet abnormalities, and electrophysiologic changes. Streptozotocin-induced diabetes in rats results in significant hemodynamic

changes as well as QT prolongation (42). These changes were reversed with correction of hyperglycemia. In humans, Marfella et al. (43) reported increased systolic and diastolic blood pressure and increased endothelin levels with acute hyperglycemia in patients with type 2 diabetes. The same researchers also induced acute hyperglycemia (270 mg/dl or 15 mmol/l) over 2 h in healthy men. This produced elevated systolic and diastolic blood pressure, increased pulse, elevation of catecholamine levels, and QTc prolongation (44). Other investigators have demonstrated an association between acute hyperglycemia and increased viscosity, blood pressure (45), and natriuretic peptide levels (46).

### Hyperglycemia and thrombosis

Multiple studies have identified a variety of hyperglycemia-related abnormalities in hemostasis, favoring thrombosis (47–51). For example, hyperglycemic changes in rats rapidly reduce plasma fibrinolytic activity and tissue plasminogen activator activity while increasing plasminogen activator inhibitor (PAI)-1 activity (52). Human studies in patients with type 2 diabetes have shown platelet hyperactivity indicated by increased thromboxane biosynthesis (47). Thromboxane biosynthesis decreases with reduction in blood glucose. Hyperglycemia-induced elevations of interleukin (IL)-6 levels have been linked to elevated plasma fibrinogen concentrations and fibrinogen mRNA (53,54).

Increased platelet activation as shown by shear-induced platelet adhesion and aggregation on extracellular matrix has been demonstrated in patients with diabetes (48). As little as 4 h of acute hyperglycemia enhances platelet activation in patients with type 2 diabetes (51). In this crossover, double-blind study, 12 patients were subjected to hyperglycemic (250 mg/dl, 13.9 mmol/l) and euglycemic (100 mg/dl, 5.55 mmol/l) clamps. Hyperglycemia precipitated stress-induced platelet activation as well as platelet P-selectin and lysosomal integral membrane protein (LIMP) expression. Hyperglycemia also caused increased plasma von Willebrand factor antigen, von Willebrand factor activity, and urinary 11-dehydro-thromboxane B<sub>2</sub> (a measure of thromboxane A<sub>2</sub> production). These changes were not seen in the euglycemic state.

If hyperglycemia-induced platelet hyperactivity is particularly evident with high-shear stress conditions, as suggested in the above studies, this finding may explain the increased thrombotic events commonly seen in hospitalized patients with diabetes.

### Hyperglycemia and inflammation

The connection between acute hyperglycemia and vascular changes likely involves inflammatory changes. Cultured human peripheral blood mononuclear cells (PBMCs), when incubated in high glucose medium (594 mg/dl, 33 mmol/l) for 6 h produce increased levels of IL-6 and tumor necrosis factor (TNF)- $\alpha$  (53). TNF- $\alpha$  is apparently involved in IL-6 production. Blocking TNF- $\alpha$  activity with anti-TNF monoclonal antibody blocks the stimulatory effect of glucose on IL-6 production by these cells. Other *in vitro* studies suggest that glucose-induced elevations in IL-6, TNF- $\alpha$ , and other factors may cause acute inflammation. This inflammatory response to glucose has been seen in adipose tissue, 3T3-L1 adipocyte cell lines, vascular smooth muscle cells, PBMCs, and other tissues or cell types (55–61).

In humans, moderate elevation of glucose to 270 mg/dl (15 mmol/l) for 5 h has been associated with increased IL-6, IL-18, and TNF- $\alpha$  (62). Elevations of these various inflammatory factors have been linked to detrimental vascular effects. For example, TNF- $\alpha$  extends the area of necrosis following left anterior descending coronary artery ligation in rabbits (63). In humans, TNF- $\alpha$  levels are elevated in the setting of AMI and correlate with severity of cardiac dysfunction (63,64). TNF- $\alpha$  may also play a role in some cases of ischemic renal injury and in congestive heart failure (CHF) (57,65). Ischemic preconditioning is associated with decreased postischemic myocardial TNF- $\alpha$  production (66). IL-18 has been proposed to destabilize atherosclerotic plaques, leading to acute ischemic syndromes (67).

One of the most commonly demonstrated relationships between hyperglycemia and inflammatory markers is the *in vitro* induction of the proinflammatory transcriptional factor, nuclear factor (NF)- $\kappa$ B by exposure of various cell types to 1–8 days of hyperglycemia (58,59,68–71). In patients with type 1 diabetes, activation of NF- $\kappa$ B in PBMCs was

positively correlated to HbA<sub>1c</sub> level ( $r = 0.67$ ,  $P < 0.005$ ) (72). A recent study by Schiefkofer et al. (73) demonstrated *in vivo* exposure to hyperglycemia (180 mg/dl, 10 mmol/l) for 2 h caused NF- $\kappa$ B activation.

### Hyperglycemia and endothelial cell dysfunction

One proposed link between hyperglycemia and poor cardiovascular outcomes is the effect of acute hyperglycemia on the vascular endothelium. In addition to serving as a barrier between blood and tissues, vascular endothelial cells play a critical role in overall homeostasis. In the healthy state, the vascular endothelium maintains the vasculature in a quiescent, relaxant, antithrombotic, antioxidant, and antiadhesive state (rev. in 74,75). During illness the vascular endothelium is subject to dysregulation, dysfunction, insufficiency, and failure (76). Endothelial cell dysfunction is linked to increased cellular adhesion, perturbed angiogenesis, increased cell permeability, inflammation, and thrombosis. Commonly, endothelial function is evaluated by measuring endothelial-dependent vasodilatation, looking most often at the brachial artery. Human *in vivo* studies utilizing this parameter confirm that acute hyperglycemia to the levels commonly seen in the hospital setting (142–300 mg/dl or 7.9–16.7 mmol/l) causes endothelial dysfunction (77–82). Only one study failed to show evidence of endothelial cell dysfunction induced by short-term hyperglycemia (83). The degree of endothelial cell dysfunction after an oral glucose challenge was positively associated with the peak glucose level, ranging from 100 to 300 mg/dl (5.5–16.7 mmol/l) (78,79). Hyperglycemia may directly alter endothelial cell function by promoting chemical inactivation of nitric oxide (84). Other mechanisms include triggering production of reactive oxygen species (ROS) or activating other pathways (rev. in 27). Despite compelling experimental data, studies examining a possible association among hyperglycemia, endothelial function, and outcomes have not to date been done in hospitalized patients.

### Hyperglycemia and the brain

Acute hyperglycemia is associated with enhanced neuronal damage following induced brain ischemia (85–98). Exploration of general mechanisms of



hyperglycemic damage has used various models of ischemia and various measures of outcomes. Models differ according to transient versus permanent ischemia as well as global versus localized ischemia. There is some indication from animal studies that irreversible ischemia or end arterial ischemia is not affected by hyperglycemia (87,99,100). The major portion of the brain that is sensitive to injury from hyperglycemia is the ischemic penumbra. This area surrounds the ischemic core. During evolution of the stroke, the ischemic penumbra may evolve into infarcted tissue or may recover as viable tissue (87,99,101,102). One of the primary mechanistic links between hyperglycemia and enhanced cerebral ischemic damage appears to be increased tissue acidosis and lactate levels associated with elevated glucose concentrations. This has been shown in various animal models with rare exception (94,102–108). Lactate has been associated with damage to neurons, astrocytes, and endothelial cells (104). In humans, Parsons et al. (109) demonstrated that the lactate-to-choline ratio determined by proton magnetic resonance spectroscopy (MRS) had value in predicting clinical outcomes and final infarct size in acute stroke. More recently, the same investigators used this method to demonstrate a positive correlation between glucose elevations and lactate production (110). Through this mechanism, hyperglycemia appears to cause hypoperfused at-risk tissue to progress to infarction.

Animal studies have shown additional association of hyperglycemia with various acute consequences that likely serve as intermediaries of adverse outcomes. For example, hyperglycemia causes accumulation of extracellular glutamate in the neocortex. Increased glutamate levels predict ensuing neuronal damage (95). A unique hippocampal cell culture model of “in vitro ischemia” demonstrated a similar relationship between hyperglycemia, glutamate activity, and increased intracellular calcium with enhanced cell death (98). Hyperglycemia has also been associated with DNA fragmentation, disruption of the blood-brain barrier, more rapid repolarization in severely hypoperfused penumbral tissue,  $\beta$ -amyloid precursor protein elevation, as well as elevated superoxide levels in neuronal tissue (111–115).

Many of the same factors noted earlier, linking hyperglycemia to cardiovas-

cular event outcomes, likely contribute to acute cerebrovascular outcomes. Specifically, in brain ischemia models exposed to hyperglycemia, hydroxyl free radicals are elevated and positively correlate with tissue damage (116). Likewise, antioxidants have a neuroprotective effect (117). Elevated glucose levels have also been linked to inhibition of nitric oxide generation, increased IL-6 mRNA, decreased cerebral blood flow, and evidence of vascular endothelial injury (90,92,118,119). Again, the composite of evidence supports scientifically viable mechanisms of central nervous system injury from hyperglycemia in the acute setting.

### Hyperglycemia and oxidative stress

Oxidative stress occurs when the formation of ROS exceeds the body's ability to metabolize them. Attempts to identify a unifying basic mechanism for many of the diverse effects of acute hyperglycemia point to the ability of hyperglycemia to produce oxidative stress (58,69,120). Acute experimental hyperglycemia to levels commonly seen in hospitalized patients induces ROS generation. Endothelial cells exposed to hyperglycemia in vitro switch from producing nitric oxide to superoxide anion (84). Increased ROS generation causes activation of transcriptional factors, growth factors, and secondary mediators. Through direct tissue injury or via activation of these secondary mediators, hyperglycemia-induced oxidative stress causes cell and tissue injury (58,59,62,70,72,74,80,121–127). In all cases studied, abnormalities were reversed by antioxidants or by restoring euglycemia (58,59,70,72,80,122,127).

### Is insulin per se therapeutic?

Two large, well-done prospective studies support the relationship between insulin therapy and improved inpatient outcomes (2,128). The prevalent assumption has been that insulin attained this benefit indirectly by controlling blood glucose. However, a growing body of literature raises the question of whether insulin may have direct beneficial effects independent of its effect on blood glucose (121,129–132).

Multiple studies suggest cardiac and neurological benefits of glucose-insulin-potassium (GIK) infusions (133–154). One may propose that such therapy supports a direct effect of the insulin since blood glucose control is not the goal of

these infusions and the benefits have been displayed in normal humans and animals. Although the direct effect of insulin may play a significant role in benefits of GIK therapy, other metabolic factors are likely to be major contributors to the mechanism of this therapy. The theory promoting this form of therapy centers on the imbalance between low glycolytic substrate in the hypoperfused tissue and elevated free fatty acids (FFAs) mobilized through catecholamine-induced lipolysis (41,155–159). In ischemic cardiac tissue, there is decreased ATP and increased inorganic phosphate production (148,156,159). Adequate glycolytic ATP is important for maintaining cellular membranes, myocardial contractility, and avoidance of the negative effect of fatty acids as substrate for ischemic myocardium (155,158–161). FFAs are associated with cardiac sympathetic overactivity, worsened ischemic damage, and possibly arrhythmias. Accordingly, using a model of 60-min low-flow ischemia followed by 30 min of reperfusion in rat hearts, investigators have demonstrated the ability of GIK infusion to increase glycolysis, decrease ATP depletion, and maintain lower inorganic phosphate levels in the affected tissue (148). These effects extrapolated to improved systolic and diastolic function in this model. In other animal models, GIK infusion in improved left ventricular contractility, decreased tissue acidosis, and decreased infarct size (144,152,162).

In small studies of individuals with or without diabetes undergoing coronary artery bypass surgery, GIK therapy is associated with shorter length of intubation and shorter length of stay (142,143,163). As therapy for patients with an AMI, GIK therapy is associated with the expected decrease in FFAs, decreased heart failure, and a suggestion of improved short-term survival (133–135,139,164). In follow-up of a first myocardial infarction (MI), individuals who received GIK therapy reported better stress tolerance, an elevated ischemic threshold, and improved myocardial perfusion by 99 m-Tc-tetrofosmin-gated single photon emission computed tomography (SPECT) compared with those receiving saline infusion (149). These studies of classic GIK therapy with emphasis on glucose delivery have been small and more suggestive than conclusive. No large, randomized, placebo-controlled studies have been reported. Even less information is available

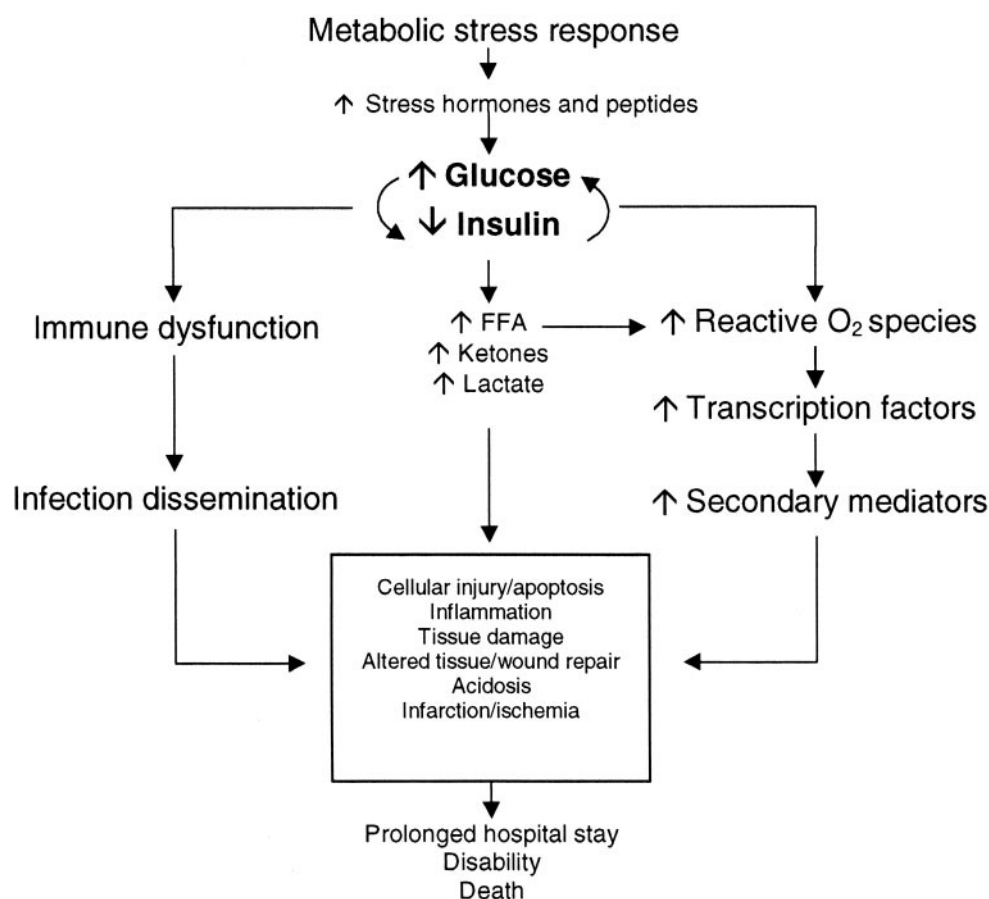

**Figure 1**—Link between hyperglycemia and poor hospital outcomes. Hyperglycemia and relative insulin deficiency caused by metabolic stress triggers immune dysfunction, release of fuel substrates, and other mediators such as ROS. Tissue and organ injury occur via the combined insults of infection, direct fuel-mediated injury, and oxidative stress and other downstream mediators. See text for details.

regarding the use of GIK therapy in strokes or cerebral ischemia. Limited studies have demonstrated safety of GIK therapy in the acute stroke patient, with a trend to reduced mortality, and a decrease in blood pressure (147,150). However, the data are clearly inadequate to make any conclusions of benefit.

Beyond GIK therapy, one finds increasing support for a direct effect of insulin on many of the abnormalities that underlie inpatient complications. Insulin treatment, ranging in duration from brief euglycemic-hyperinsulinemic clamps to 2 months of ongoing therapy, improves endothelial cell function (165–171). There are rare exceptions to this finding (172). Insulin also has vasodilatory properties in the internal carotid and femoral arteries (165,167). The vasodilatory properties of insulin appear to be mediated at least in part by stimulating nitric oxide release (165,166). Aortic endothelial cell cultures have also demonstrated insulin-induced nitric oxide synthase activity and increased nitric oxide levels (172,173). In a rat model, insulin inhibits

the upregulation of the endothelial adhesion molecule P-selectin expression seen as a consequence of elevated glucose levels (121).

Insulin infusion has anti-inflammatory effects (129,174,175). In a large study of intensive insulin infusion therapy in the intensive care unit, investigators found decreased C-reactive protein (CRP) levels in insulin-treated patients (176). Cell culture studies have shown the ability of insulin incubation to reduce oxidative stress and its associated apoptosis in cardiomyocytes (177). In addition to the induction of endothelial-derived nitric oxide, human aorta cell and human mononuclear cell culture studies have shown dose-dependent reductions in ROS, the proinflammatory transcription factor NF- $\kappa$ B, intercellular adhesion molecule (ICAM)-1, and the chemokine monocyte chemoattractant protein (MCP)-1 (173,178–180). Insulin also inhibits the production TNF- $\alpha$  and the proinflammatory transcription factor early growth response gene (Egr)-1 (181).

These effects suggest a general anti-inflammatory action of insulin.

In an animal model of myocardial ischemia, insulin given early in the acute insult reduced infarct size by >45% (182). This effect was mediated through the Akt and p70s6 kinase-dependent signaling pathway and was independent of glucose. There is preliminary evidence of insulin's ability to improve pulmonary diffusion and CHF in humans (183). Studies have also suggested that insulin protects from ischemic damage in the brain, kidney, and lung (184–186). In catabolic states such as severe burns, hyperglycemia promotes muscle catabolism, while exogenous insulin produces an anabolic effect (187). Insulin therapy has also been associated with an improved fibrinolytic profile in patients at the time of acute coronary events, reducing fibrinogen and PAI-1 levels (132). Finally, insulin infusion reduces collagen-induced platelet aggregation and several other parameters of platelet activity in humans. This effect was attenuated in obese individuals (188).

In summary, the overwhelming balance of evidence supports a beneficial effect of insulin in the acute setting. Whether these benefits are the result of a direct pharmacologic effect of insulin or represent an indirect effect by improved glucose control, enhanced glycolysis, or suppressed lipolysis is more difficult to determine. Studies in cell cultures control for glucose but have other physiologic limitations. Nevertheless, the data are provocative and certainly leave the impression that insulin therapy in the hospital has significant potential for benefit. Considering the numerous contraindications to the use of oral agents in the hospital, insulin is the clear choice for glucose manipulation in the hospitalized patient.

### Potential relationships between metabolic stress, hyperglycemia, hypoinsulinemia, and poor hospital outcomes

To explain the dual role of glucose and insulin on hospital outcomes, Levetan and Magee (189) proposed the following relationships. Elevations in counterregulatory hormones accelerate catabolism, hepatic gluconeogenesis, and lipolysis. These events elevate blood glucose, FFAs, ketones, and lactate. The rise in glucose blunts insulin secretion via the mechanism of glucose toxicity (190), resulting in further hyperglycemia. The vicious cycle of stress-induced hyperglycemia and hypoinsulinemia subsequently causes maladaptive responses in immune function, fuel production, and synthesis of mediators that cause further tissue and organ dysfunction (Fig. 1). Thus, the combination of hyperglycemia and relative hypoinsulinemia is mechanistically positioned to provide a plausible explanation for the poor hospital outcomes seen in observational studies.

### WHAT ARE THE TARGET BLOOD GLUCOSE LEVELS FOR THE HOSPITALIZED PATIENT?

A rapidly growing body of literature supports targeted glucose control in the hospital setting with potential for improved mortality, morbidity, and health care economic outcomes. The relationship of hospital outcomes to hyperglycemia has been extensively examined. Hyperglycemia in the hospital may result from stress, decompensation of type 1 diabetes, type 2 diabetes, or other forms of diabetes

and/or may be iatrogenic due to administration of pharmacologic agents, including glucocorticoids, vasopressors, etc. Distinction between decompensated diabetes and stress hyperglycemia is often not made or alternatively is not clear at the time of presentation with an acute illness. When hyperglycemia is treated along with other acute problems, outcomes are generally improved. This section will review the evidence for outcomes from observational and interventional studies in hospitalized patients with hyperglycemia. While observational reports abound, interventional studies that report improved outcomes with targeted glucose control—though few in number—are now beginning to provide a source of evidence in the literature.

To make the case for defining targets for glucose control in hospital settings, it is necessary to examine the literature on both short- and long-term mortality. Data regarding diabetes and hyperglycemia-associated morbidity have emerged from specific clinical settings. These data include infection rates, need for intensive care unit admission, functional recovery, and health economic outcomes such as length of stay and hospital charges. For their practical implications and for the purpose of this review, literature on the association of blood glucose level with outcomes will be grouped into the medical and surgical areas in which studies have been reported as follows: general medicine and surgery, cardiovascular disease (CVD) and critical care, and neurologic disorders (Table 1).

#### General medicine and surgery

Observational studies suggest an association between hyperglycemia and increased mortality. Recently, investigators have reported on outcomes correlated with blood glucose levels in the general medicine and surgery setting. Pomposelli et al. (191) studied 97 patients with diabetes undergoing general surgery procedures. Blood glucose testing occurred every 6 h. The authors found that a single blood glucose level  $>220$  mg/dl ( $12.2$  mmol/l) on the first postoperative day was a sensitive (85%), but relatively nonspecific (35%), predictor of nosocomial infections. Patients with a blood glucose value(s)  $>220$  mg/dl ( $12.2$  mmol/l) had infection rates that were 2.7 times higher than the rate for patients with blood glucose values  $<220$  mg/dl ( $12.2$  mmol/l).

When minor infections of the urinary tract were excluded, the relative risk (RR) for serious postoperative infection, including sepsis, pneumonia, and wound infections, was 5.7.

Umpierrez et al. (1) reviewed 1,886 admissions for the presence of hyperglycemia (fasting blood glucose  $\geq 126$  mg/dl or random blood glucose  $\geq 200$  mg/dl on two or more occasions). Care was provided on general medicine and surgery units. Among these subjects, there were 223 patients (12%) with new hyperglycemia and 495 (26%) with known diabetes. Admission blood glucose for the normoglycemic group was  $108 \pm 10.8$  mg/dl ( $6 \pm 0.6$  mmol/l); for the new hyperglycemia group, it was  $189 \pm 18$  mg/dl ( $10.5 \pm 1$  mmol/l); and for known diabetes, it was  $230.4 \pm 18$  mg/dl ( $12.8 \pm 1$  mmol/l). After adjusting for confounding factors, patients with new hyperglycemia had an 18-fold increased in-hospital mortality and patients with known diabetes had a 2.7-fold increased in-hospital mortality compared with normoglycemic patients. Length of stay was higher for the new hyperglycemia group compared with normoglycemic and known diabetic patients ( $9 \pm 0.7$ ,  $4.5 \pm 0.1$ , and  $5.5 \pm 0.2$  days, respectively,  $P < 0.001$ ). Both the new hyperglycemia and known diabetic patients were more likely to require intensive care unit (ICU) care when compared with normoglycemic subjects (29 vs. 14 vs. 9%, respectively,  $P < 0.01$ ) and were more likely to require transitional or nursing home care. There was a trend toward a higher rate of infections and neurologic events in the two groups with hyperglycemia (1). It is likely that the “new” hyperglycemic patients in this report were a heterogeneous population made up of patients with unrecognized diabetes, prediabetes, and/or stress hyperglycemia secondary to severe illness.

The observational data from these two studies suggest that hyperglycemia from any etiology in the hospital on general medicine and surgery services is a significant predictor of poor outcomes, relative to outcomes for normoglycemic subjects. Patients with hyperglycemia, with or without diabetes, had increased risk of in-hospital mortality, postoperative infections, neurologic events, intensive care unit admission and increased length of stay. The Pomposelli article (191) found that a blood glucose level of 220 mg/dl ( $12.2$  mmol/l) separated patients for risk of infection. Data from the

Table 1—Evidence for association of blood glucose level with clinical outcomes

| Clinical setting             |                                                                                                                                                                                                                                                                                              | Threshold BG levels [mg/dL (mmol/L)] | Outcomes and comments                                                                                                                                                                                                                                                                                                                                                                                                                                                                                                                                                                                                                                                                                                                                                                                                                                                                                                                                                                       |
|------------------------------|----------------------------------------------------------------------------------------------------------------------------------------------------------------------------------------------------------------------------------------------------------------------------------------------|--------------------------------------|---------------------------------------------------------------------------------------------------------------------------------------------------------------------------------------------------------------------------------------------------------------------------------------------------------------------------------------------------------------------------------------------------------------------------------------------------------------------------------------------------------------------------------------------------------------------------------------------------------------------------------------------------------------------------------------------------------------------------------------------------------------------------------------------------------------------------------------------------------------------------------------------------------------------------------------------------------------------------------------------|
| General medicine and surgery | Mortality, ICU admits, length of stay, and nursing home or transitional care admits correlated with BG and glucose tolerance status:<br>Normoglycemia = $108 \pm 10.8$ (6 $\pm$ 0.6);<br>New hyperglycemia = $189 \pm 18$ (10.5 $\pm$ 1);<br>Known diabetes = $230.4 \pm 18$ (12.8 $\pm$ 1). |                                      | Review of BG levels of patients on general medicine and surgery wards. Hyperglycemia defined as two or more measurements with fasting BG $\geq 126$ (7) and/or random $\geq 200$ (11.1). Hospital mortality for normoglycemic patients was 1.7%. With known diabetes mortality was 3% and with "new" hyperglycemia it was 16%. After adjustment for variables, the "new" hyperglycemia group had an 18.3-fold increased mortality rate compared with a 2.7-fold increase with known diabetes. Patients with new hyperglycemia also had an increased length of stay, were more likely to require ICU care, and were more likely to require transitional or nursing home care (Obs, $n = 1,886$ ) (1).                                                                                                                                                                                                                                                                                        |
|                              | Infection rates correlated with BG above 220.                                                                                                                                                                                                                                                |                                      | 5.9-fold increase in serious infections, including sepsis, pneumonia, and wound infections for BG over 220 (12.2), which was a sensitive (85%) predictor of nosocomial infection (Obs, $n = 97$ ) (191).                                                                                                                                                                                                                                                                                                                                                                                                                                                                                                                                                                                                                                                                                                                                                                                    |
| CVD and critical care        | Mortality, CHF, and cardiogenic shock risk correlated with BG<br>Above 109.8 (6),<br>in patients without known diabetes;<br>At or above 124 (6.9),<br>with diabetes diagnosis.                                                                                                               |                                      | Literature review. Relative risk (RR) for in-hospital mortality increased 3.9-fold in subjects without diabetes with BG at or above range of 109.8–144 (6.1–8), 95% CI 2.9–5.4; risk of CHF and cardiogenic shock was also increased. RR for moderate increase in mortality with known diabetes was 1.7 (14 article review with meta-analysis) (192).                                                                                                                                                                                                                                                                                                                                                                                                                                                                                                                                                                                                                                       |
|                              | Admit BG, stratified according to WHO criteria and correlated with mortality:<br>I. BG less than 100.8 (5.6) to<br>IV. BG greater than or equal to 199.8 (11)                                                                                                                                |                                      | One-year mortality was 19.3% for BG $< 100.8$ (5.6) at time of admission, compared with 44% when BG $\geq 199.8$ (11). Mortality was higher in patients with diabetes than in those without (40 vs. 16%, $P < 0.05$ ) (Obs, $n = 336$ ) (193).                                                                                                                                                                                                                                                                                                                                                                                                                                                                                                                                                                                                                                                                                                                                              |
| Cardiac surgery              | Mortality correlated with BG in intensive insulin therapy group where mean BG = $172.8 \pm 59.4$ (9.6 $\pm$ 3.3) compared with conventional therapy group where mean BG = $210.6 \pm 73.8$ (11.7 $\pm$ 4.1).                                                                                 |                                      | Intensive insulin therapy in patients with acute MI, followed by multishot regimen for 3 or more months, with 29% reduction in mortality at 1 year. Benefit extends to at least 3.4 years. One life saved for nine patients treated (Int, $n = 620$ ) (128).                                                                                                                                                                                                                                                                                                                                                                                                                                                                                                                                                                                                                                                                                                                                |
|                              | Mortality positively correlated with BG in a dose-dependent manner, with the lowest mortality in the group where mean postoperative BG $< 150$ (8.3).                                                                                                                                        |                                      | Observational studies using historical controls. Both mortality and incidence of DSWIs were reduced to the nondiabetic range after implementing insulin infusion protocols with progressively lower BG targets over time (196,197).                                                                                                                                                                                                                                                                                                                                                                                                                                                                                                                                                                                                                                                                                                                                                         |
| Critical care                | Mortality and sepsis risk correlated with BG. Intensive insulin therapy arm with mean BG $103 \pm 19$ (5.7 $\pm$ 1.06); conventional treatment arm with mean BG $153 \pm 33$ (8.5 $\pm$ 1.8).                                                                                                |                                      | Prospective randomized controlled study of adults admitted to surgical ICU and on mechanical ventilation. Sixty percent had had cardiac surgery, majority of others also surgical patients. IIT to maintain BG in 80–110 (4.4–6.1) range compared with conventional therapy (CT) to target BG to 180–200 (10–11.1). IIT reduced ICU mortality by 40% from 8.0 to 4.6%, $P < 0.04$ . For each 20 mg/dL increase in BG, risk of death was increased by 30%. IIT also reduced incidence of sepsis by 46% and overall hospital mortality by 34%. A gradual decline in risk for ICU and hospital death with decline in BG level was observed, with no identifiable threshold below which there was no further risk reduction. Prolonged inflammation, defined as elevation in CRP above 150 mg/dL for over 3 days, was associated with mean BG level (per 20 mg/dL added) with or of 1.16 (95% CI 1.06–1.24), $P = 0.0006$ . Threshold may be higher than 110 (6.1) (Int, $n = 1,548$ ) (2,200). |
| Neurologic disorders         | Mortality and functional recovery after acute ischemic stroke correlated with BG.<br>Admission BG over 110 (6.1) for mortality;<br>over 121 for functional recovery.                                                                                                                         |                                      | Literature review (1966–2000). After ischemic stroke, admission glucose level $> 110$ –126 ( $> 6.1$ –7) associated with increased risk of in-hospital or 30-day mortality in patients without diabetes only (RR 3.8; 95% CI 2.32–4.64). Stroke survivors without diabetes and BG over 121–144 (6.7–8) had RR of 1.41 (1.16–1.73) for poor functional recovery (metaanalysis, 26 studies) (96).                                                                                                                                                                                                                                                                                                                                                                                                                                                                                                                                                                                             |
|                              | Neurologic function after acute stroke correlated with admission BG.<br>Odds for neurologic improvement decreased with OR of 0.76 for each 100 mg/dL BG increase.                                                                                                                            |                                      | Controlled, randomized trial of molecular heparin in acute stroke. Mean admission BG $144 \pm 68$ (8 $\pm$ 3.8) associated with neurologic improvement at 3 months. In those without improvement, BG was $160 \pm 84$ (8.9 $\pm$ 4.7). As BG increased, odds for neurologic improvement decreased, with OR = 0.76 per 100-mg/dL increase in admission BG (95% CI 0.61–0.95, $P = 0.01$ ) (Obs, $n = 1,259$ ) (201).                                                                                                                                                                                                                                                                                                                                                                                                                                                                                                                                                                         |
|                              | Functional outcomes and return to work after stroke correlated with admission BG.<br>Admission BG under 120 (6.7) with positive relationship.<br>RtPA-induced hemorrhage into an infarct correlated with BG over 300 (16.7).                                                                 |                                      | Prospective data. Stroke-related deficits were more severe when admission glucose values were $> 120$ (6.7). Only 43% of patients with an admission glucose value of $> 120$ mg/dL able to return to work, whereas 76% of patients with lower glucose values regained employment (202).                                                                                                                                                                                                                                                                                                                                                                                                                                                                                                                                                                                                                                                                                                     |
|                              | Mortality, length of stay, and charges increased with admission BG $\geq 130$ (7.2).                                                                                                                                                                                                         |                                      | Central collection of retrospective and prospective data on acute ischemic stroke treated in clinical practices with alteplase. BG $> 300$ mg/dL an independent risk factor for hemorrhage into an infarct when treatment with recombinant RtPA is given (Obs, $n = 1,205$ ) (203).                                                                                                                                                                                                                                                                                                                                                                                                                                                                                                                                                                                                                                                                                                         |
|                              | Hypoglycemia risk and 4 week mortality with BG targeted to 72–126 (4–7).                                                                                                                                                                                                                     |                                      | Hospitalization for acute ischemic stroke. Hyperglycemia (random BG at or above 130) present in 40% at admission. Most remained hyperglycemic with mean BG values of 206 (11.4). Random admission serum glucose $\geq 130$ (7.2) independently associated with increased risk of death at 30 days (HR 1.87) and 1 year (HR 1.75), both $P \leq 0.01$ . Other significant correlates with hyperglycemia, when compared with normal BG, were length of stay (7 vs. 6 days, $P = 0.015$ ) and charges (\$5,262 vs. \$6,611, $P < 0.001$ ) (Obs, $n = 656$ ) (205).                                                                                                                                                                                                                                                                                                                                                                                                                             |
|                              | Penumbra salvage, final infarct size, and functional outcome in patients with median acute BG ranging from 104.4 to 172.8 (5.8–9.6).                                                                                                                                                         |                                      | Glucose-insulin infusion in acute stroke with mild-to-moderate hyperglycemia. Examined the safety of treating to a target glucose of 72–126 (4–7). Lowering BG was found to be without significant risk of hypoglycemia or 4-week excess mortality in patients with acute stroke and mild-to-moderate hyperglycemia (147).                                                                                                                                                                                                                                                                                                                                                                                                                                                                                                                                                                                                                                                                  |
|                              |                                                                                                                                                                                                                                                                                              |                                      | Study of MRI and MRS in acute stroke. Prospective evaluation with serial diffusion-weighted and perfusion-weighted MRI and acute BG measurements. Median acute BG was $133.2$ mg/dL (7.4 mmol/L), range 104.4–172.8 mg/dL (5.8–9.6 mmol/L). A doubling of BG from 5 to 10 mmol/L led to a 60% reduction in penumbra salvage and a 56-cm <sup>3</sup> increase in final infarct size. In patients with acute perfusion-diffusion mismatch, acute hyperglycemia was also correlated with reduced salvage of mismatch tissue from infarction, greater final infarct size, and worse functional outcome, independent of baseline stroke severity, lesion size, and diabetic status (Obs, $n = 63$ ) (110).                                                                                                                                                                                                                                                                                      |
|                              |                                                                                                                                                                                                                                                                                              |                                      | BG, blood glucose; CT, conventional therapy; DM, diabetes mellitus; HR, hazard ratio; Int, interventional study; Obs, observational study; RtPA, recombinant tissue plasminogen activator; Rx, therapy.                                                                                                                                                                                                                                                                                                                                                                                                                                                                                                                                                                                                                                                                                                                                                                                     |



Umpierrez study (1) and most of the literature from other disciplines, as outlined elsewhere in this review, would suggest a lower threshold for optimal hospital outcomes.

**Evidence for a blood glucose threshold.** The Umpierrez study demonstrated better outcomes for patients with fasting and admission blood glucose  $<126$  mg/dl (7 mmol/l) and all random blood glucose levels  $<200$  mg/dl (11.1 mmol/l). Because the Pomposelli and Umpierrez studies are observational, a causal link between hyperglycemia and poor outcomes cannot be established.

### CVD and critical care

Numerous articles contain data linking blood glucose level to outcomes in AMI and cardiac surgery, for which patients receive care predominantly in the ICU setting. The majority of these trials are observational, but the literature also includes several large, landmark interventional studies that have markedly increased awareness of the need for targeted glycemic control in these settings. **AMI.** In 2000, Capes et al. (192) reviewed blood glucose levels and mortality in the setting of AMI from 15 previously published studies and performed a meta-analysis of the results to compare the RR of in-hospital mortality and CHF in both hyper- and normoglycemic patients with and without diabetes. In subjects without known diabetes whose admission blood glucose was  $\geq 109.8$  mg/dl (6.1 mmol/l), the RR for in-hospital mortality was increased significantly (RR 3.9, 95% CI 2.9–5.4). When diabetes was present and admission glucose was  $\geq 180$  mg/dl (10 mmol/l), risk of death was moderately increased (1.7, 1.2–2.4) compared with patients who had diabetes but no hyperglycemia on admission.

Bolk et al. (193) analyzed admission blood glucose values in 336 prospective, consecutive patients with AMI with average follow-up to 14.2 months. Twelve percent of this cohort had previously diagnosed diabetes. Multivariate analysis revealed an independent association of admission blood glucose and mortality. The 1-year mortality rate was 19.3% in subjects with admission plasma glucose  $<100.8$  mg/dl (5.6 mmol/l) and rose to 44% with plasma glucose  $\geq 199.8$  mg/dl (11 mmol/l). Mortality was higher in patients with known diabetes than in those without diabetes (40 vs. 16%,  $P < 0.05$ ).

From the frequently cited Diabetes

and Insulin-Glucose Infusion in Acute Myocardial Infarction (DIGAMI) study, Malmberg and colleagues (128,194) have published the results of a prospective interventional trial of insulin-glucose infusion followed by subcutaneous insulin treatment in diabetic patients with AMI, reporting mortality at 1 year. Of 620 persons with diabetes and AMI, 306 were randomized to intensive treatment with insulin infusion therapy, followed by a multishot insulin regimen for 3 or more months. Patients randomized to conventional therapy received standard diabetes therapy and did not receive insulin unless clinically indicated. Baseline blood glucose values were similar in the intensive treatment group,  $277.2 \pm 73.8$  mg/dl ( $15.4 \pm 4.1$  mmol/l), and the conventional treatment group,  $282.6 \pm 75.6$  mg/dl ( $15.7 \pm 4.2$  mmol/l). Blood glucose levels decreased in the first 24 h in the intervention group to  $172.8 \pm 59.4$  mg/dl ( $9.6 \pm 3.3$  mmol/l;  $P < 0.001$  vs. conventional treatment), whereas blood glucose declined to  $210.6 \pm 73.8$  mg/dl ( $11.7 \pm 4.1$  mmol/l). The blood glucose range for each group was wide: 116.4–232.2 mg/dl (6.5–12.9 mmol/l) in the intensive treatment group and 136.8–284.4 mg/dl (7.6–15.8 mmol/l) in the conventional treatment group. Mortality at 1 year in the intensive treatment group was 18.6%, and for the conventional treatment group it was 26.1%, a 29% reduction in mortality for the intervention arm ( $P = 0.027$ ). At 3.4 (1.6–5.6) years follow-up, mortality was 33% in the intensive treatment group and 44% in the conventional treatment group (RR 0.72, 95% CI 0.55–0.92;  $P = 0.011$ ), consistent with persistent reduction in mortality. The benefit of intensive control was most pronounced in 272 patients who had not had prior insulin therapy and had a less risk for CVD (0.49, 0.30–0.80;  $P = 0.004$ ).

In the DIGAMI study, insulin infusion in AMI followed by intensive subcutaneous insulin therapy for 3 or more months improved long-term survival, with a benefit that extends to at least 3.4 years (128). An absolute reduction in mortality of 11% was observed, meaning that one life was saved for every nine treated patients. The observation that higher mean glucose levels were associated with increased mortality between groups of patients with diabetes would suggest that stress hyperglycemia plays an independent role in the determination of

outcomes. In addition, it is of interest that in spite of the observation that blood glucose levels between the intensive and conventional treatment groups were similar, a significant difference in mortality between these groups was found. A relatively modest reduction in blood glucose in the intensive treatment group compared with the conventional treatment group produced a statistically significant improvement in mortality. This suggests the possibility that the beneficial effect of improved control may be mediated through mechanisms other than a direct effect of hyperglycemia, such as a direct effect of insulin.

### Evidence for a blood glucose threshold for increased mortality in AMI.

- The metaanalysis of Capes et al. (192) reported a blood glucose threshold of  $>109.8$  mg/dl (6.1 mmol/l) for patients without diabetes and  $>180$  mg/dl (10 mmol/l) for known diabetes.
- The observational study of Bolk et al. (193) identified threshold blood glucoses, divided by World Health Organization (WHO) classification criteria, with mortality risk of 19.3% for normoglycemia (blood glucose  $<100.8$  mg/dl [5.6 mmol/l]), which rose progressively to 44% for blood glucose  $>199.8$  mg/dl (11 mmol/l).
- In the DIGAMI study, mean blood glucose in the intensive insulin intervention arm was 172.8 mg/dl (9.6 mmol/l), where lower mortality risk was observed. In the conventional treatment arm, mean blood glucose was 210.6 mg/dl (11.7 mmol/l). The broad range of blood glucose levels within each arm limits the ability to define specific blood glucose target thresholds.

**Cardiac surgery.** Attainment of targeted glucose control in the setting of cardiac surgery is associated with reduced mortality and risk of deep sternal wound infections. Furnary and colleagues (196,197) treated cardiac surgery patients with diabetes with either subcutaneous insulin (years 1987–1991) or with intravenous insulin (years 1992–2003) in the perioperative period. From 1991–1998, the target glucose range was 150–200 mg/dl (8.3–11.1 mmol/l); in 1999 it was dropped to 125–175 mg/dl (6.9–9.7 mmol/l), and in 2001 it was again lowered to 100–150 mg/dl (5.5–8.3 mmol/l). Following implementation of the protocol in 1991, the authors re-



ported a decrease in blood glucose level for the first 2 days after surgery and a concomitant decrease in the proportion of patients with deep wound infections, from 2.4% (24 of 990) to 1.5% (5 of 595) ( $P < 0.02$ ) (198). A recent analysis of the cohort found a positive correlation between the average postoperative glucose level and mortality, with the lowest mortality in patients with average postoperative blood glucose  $<150$  mg/dl (8.3 mmol/l) (197).

Golden et al. (199) performed a non-concurrent prospective cohort chart review study in cardiac surgery patients with diabetes ( $n = 411$ ). Perioperative glucose control was assessed by the mean of six capillary blood glucose measures performed during the first 36 h following surgery. The overall infectious complication rate was 24.3%. After adjustment for variables, patients with higher mean capillary glucose readings were at increased risk of developing infections. Compared with subjects in the lowest quartile for blood glucose, those in quartiles 2–4 were at progressively increased risk for infection (RR 1.17, 1.86, and 1.78 for quartiles 2, 3, and 4, respectively,  $P = 0.05$  for trend). These data support the concept that perioperative hyperglycemia is an independent predictor of infection in patients with diabetes.

**Critical care.** Van den Berghe et al. (200) performed a prospective, randomized controlled study of 1,548 adults who were admitted to a surgical intensive care unit and were receiving mechanical ventilation. Reasons for ICU admission were cardiac surgery (~60%) and noncardiac indications, including neurologic disease (cerebral trauma or brain surgery), other thoracic surgery, abdominal surgery or peritonitis, vascular surgery, multiple trauma, or burns and transplant (4–9% each group). Patients were randomized to receive intensive insulin therapy (IIT) to maintain target blood glucose in the 80–110 mg/dl (4.4–6.1) range or conventional therapy to maintain target blood glucose between 180 and 200 mg/dl (10–11.1 mmol/l). Insulin infusion was initiated in the conventional treatment group only if blood glucose exceeded 215 mg/dl (11.9 mmol/l), and the infusion was adjusted to maintain the blood glucose level between 180 and 200 mg/dl (10.0 and 11.1 mmol/l). After the patients left the ICU they received standard care in the hospital with a target blood glucose of

180 and 200 mg/dl (10.0 and 11.1 mmol/l).

Ninety-nine percent of patients in the IIT group received insulin infusion, as compared with 39% of the patients in the conventional treatment group. In the IIT arm, blood glucose levels were  $103 \pm 19$  mg/dl ( $5.7 \pm 1.1$  mmol/l) and in conventional treatment  $153 \pm 33$  mg/dl ( $8.5 \pm 1.8$  mmol/l). IIT reduced mortality during ICU care from 8.0% with conventional treatment to 4.6% ( $P < 0.04$ ). The benefit of IIT was attributable to its effect on mortality among patients who remained in the unit for more than 5 days (20.2% with conventional treatment vs. 10.6% with IIT,  $P = 0.005$ ). IIT also reduced overall in-hospital mortality by 34% (2). In a subsequent analysis, Van den Berghe (200) demonstrated that for each 20 mg/dl (1.1 mmol/l), glucose was elevated  $>100$  mg/dl (5.5 mmol/l) and the risk of ICU death increased by 30% ( $P < 0.0001$ ). Daily insulin dose (per 10 units added) was found as a positive rather than negative risk factor, suggesting that it was not the amount of insulin that produced the observed reduction in mortality. Hospital and ICU survival were linearly associated with ICU glucose levels, with the highest survival rates occurring in patients achieving an average blood glucose  $<110$  mg/dl (6.1 mmol). An improvement in outcomes was found in patients who had prior diabetes as well as in those who had no history of diabetes.

#### Evidence for a blood glucose threshold in cardiac surgery and critical care.

- Furnary et al. (196) and Zerr et al. (198) identified a reduction in mortality throughout the blood glucose spectrum with the lowest mortality in patients with blood glucose  $<150$  mg/dl (8.3 mmol/l).
- Van den Berghe et al. (2), using intensive intravenous insulin therapy, reported a 45% reduction in ICU mortality with a mean blood glucose of 103 mg/dl (5.7 mmol/l), as compared with the conventional treatment arm, where mean blood glucose was 153 mg/dl (8.5 mmol/l) in a mixed group of patients with and without diabetes.

**Acute neurologic illness and stroke.** In the setting of acute neurologic illness, stroke, and head injury, data support a weak association between hyperglycemia and increased mortality and are scanty for patients with known diabetes. In these

clinical settings, available data, with one exception, are observational. Capes et al. (96) reported on mortality after stroke in relation to admission glucose level from 26 studies, published between 1996 and 2000, where RRs for prespecified outcomes were reported or could be calculated. After ischemic stroke, admission glucose level  $>110$ – $126$  mg/dl ( $>6.1$ – $7$  mmol/l) was associated with increased risk of in-hospital or 30-day mortality in patients without diabetes only (RR 3.8, 95% CI 2.32–4.64). Stroke survivors without diabetes and blood glucose  $>121$ – $144$  mg/dl (6.7–8 mmol/l) had an RR of 1.41 (1.16–1.73) for poor functional recovery. After hemorrhagic stroke, admission hyperglycemia was not associated with higher mortality in either the diabetes or nondiabetes groups.

Several of the studies that were included in the analysis of Capes et al. (96) contain additional data that support an association between blood glucose and outcomes in stroke. In the Acute Stroke Treatment Trial (TOAST), a controlled, randomized study of the efficacy of a low-molecular weight heparinoid in acute ischemic stroke ( $n = 1,259$ ), neurologic improvement at 3 months (a decrease by four or more points on the National Institutes of Health [NIH] Stroke Scale or a final score of 0) was seen in 63% of subjects. Those with improvement had a mean admission glucose of  $144 \pm 68$  mg/dl, and those without improvement had blood glucose of  $160 \pm 84$  mg/dl. In multivariate analysis, as admission blood glucose increased, the odds for neurologic improvement decreased with an OR of 0.76 per 100 mg/dl increase in admission glucose (95% CI 0.61–0.95,  $P = 0.01$ ) (201). Subgroup analysis for patients with or without a history of diabetes was not done. Pulsinelli et al. (202) reported worse outcomes for both patients with diabetes and hyperglycemic patients without an established diagnosis of diabetes compared with those who were normoglycemic. Stroke-related deficits were more severe when admission glucose values were  $>120$  mg/dl (6.7 mmol/l). Only 43% of the patients with an admission glucose value of  $>120$  mg/dl were able to return to work, whereas 76% of patients with lower glucose values regained employment.

Demchuk et al. (203) studied the effect of admission glucose level and risk for intracerebral hemorrhage into an infarct

when treatment with recombinant tissue plasminogen activator was given to 138 patients presenting with stroke. Twenty-three percent of the cohort had known diabetes. The authors reported admission blood glucose and/or history of diabetes as the only independent predictors of hemorrhage. Kiers et al. (204) prospectively studied 176 sequential acute stroke patients and grouped them by admission blood glucose level, HbA<sub>1c</sub> level, and history of diabetes. Threshold blood glucose for euglycemia was defined as fasting blood glucose <140 mg/dl (7.8 mmol/l). The authors divided patients into one of four groups: euglycemia with no history of diabetes, patients with "stress hyperglycemia" (blood glucose >140 mg/dl, 7.8 mmol/l, and HbA<sub>1c</sub> <8%), newly diagnosed diabetes (blood glucose >140 mg/dl, 7.8 mmol/l, and HbA<sub>1c</sub> >8%), and known diabetes. No difference was found in the type or site of stroke among the four groups. Compared with the euglycemic, nondiabetic patients, mortality was increased in all three groups of hyperglycemic patients.

Williams et al. (205) reported on the association of hyperglycemia and outcomes in a group of 656 acute stroke patients. Fifty-two percent of the cohort had a known history of diabetes. Hyperglycemia, defined as a random blood glucose  $\geq$ 130 mg/dl (7.22 mmol/l), was present in 40% of patients at the time of admission. Hyperglycemia was an independent predictor of death at 30 days (RR 1.87) and at 1 year (RR 1.75) (both  $P \leq 0.01$ ). Other outcomes that were significantly correlated with hyperglycemia, when compared with normal blood glucose, were length of stay (7 vs. 6 days,  $P = 0.015$ ) and charges (\$6,611 vs. \$5,262,  $P < 0.001$ ).

Recently, Parsons et al. (110) reported a study of magnetic resonance imaging (MRI) and MRS in acute stroke. Sixty-three acute stroke patients were prospectively evaluated with serial diffusion-weighted and perfusion-weighted MRI and acute blood glucose measurements. Median acute blood glucose was 133.2 mg/dl (7.4 mmol/l), range 104.4–172.8 mg/dl (5.8–9.6 mmol/l). A doubling of blood glucose from 90 to 180 mg/dl (5–10 mmol/l) led to a 60% reduction in penumbral salvage and a 56 cm<sup>3</sup> increase in final infarct size. For patients with acute perfusion-diffusion mismatch, acute hyperglycemia was correlated with

reduced salvage of mismatch tissue from infarction, greater final infarct size, and worse functional outcome, independent of baseline stroke severity, lesion size, and diabetes status. Furthermore, higher acute blood glucose in patients with perfusion-diffusion mismatch was associated with greater acute-subacute lactate production, which, in turn, was independently associated with reduced salvage of mismatch tissue. Acute hyperglycemia increases brain lactate production and facilitates conversion of hypoperfused at-risk tissue into infarction, which may adversely affect stroke outcome.

These numerous observational studies further support the need for randomized controlled trials that aggressively target glucose control in acute stroke. To date, there is just one report of a treat-to-target intervention in stroke patients. The Glucose Insulin in Stroke Trial (GIST) examined the safety of GIK infusion in treating to a target glucose of 72–126 mg/dl (4–7 mmol/l). Lowering plasma glucose levels was found to be without significant risk of hypoglycemia or excess mortality in patients with acute stroke and mild-to-moderate hyperglycemia (206). No data on functional recovery were reported. While it is promising that these investigators were able to lower plasma glucose without increasing risk of hypoglycemia or mortality for stroke patients, until further studies test the effectiveness of this approach and possible impact on outcomes, it cannot be considered standard practice.

Hyperglycemia is associated with worsened outcomes in patients with acute stroke and head injury, as evidenced by the large number of observational studies in the literature. It seems likely that the hyperglycemia associated with these acute neurologic conditions results from the effects of stress and release of insulin counterregulatory hormones. The elevated blood glucose may well be a marker of the level of stress the patient is experiencing. The hyperglycemia can be marked in these patients. Studies are needed to assess the role of antihyperglycemic pharmacotherapy in these settings for possible impact on outcomes. Clinical trials to investigate the impact of targeted glycemic control on outcomes in patients with stress hyperglycemia and/or known diabetes and acute neurologic illness are needed.

**Evidence for a blood glucose threshold in acute neurologic disorders.** Observational studies suggest a correlation between blood glucose level, mortality, morbidity, and health outcomes in patients with stroke.

- Capes et al.'s (96) metaanalysis identified an admission blood glucose >110 mg/dl (6.1 mmol/l) for increased mortality for acute stroke.
- Studies by Pulsinelli, Jorgenson, and Weir et al. (202) identified an admission blood glucose >120 mg/dl (6.67 mmol/l), 108 mg/dl (6 mmol/l), and 144 mg/dl (8 mmol/l), respectively, for increased severity and mortality for acute stroke.
- Williams et al. (205) reported a threshold admission blood glucose  $\geq$ 130 mg/dl (7.2 mmol/l) for increased mortality, length of stay, and charges in acute stroke.
- Scott et al. (206) demonstrated acceptable hypoglycemia risk and no excess 4-week mortality with glucose-insulin infusion treatment targeted to blood glucose range of 72–126 mg/dl (4–7 mmol/l) in acute stroke.
- Parsons et al. (110) reported that a doubling of blood glucose from 90 to 180 mg/dl (5–10 mmol/l) was associated with 60% worsening of penumbral salvage and a 56-cm<sup>3</sup> increase in infarct size.

## HOW ARE TARGET BLOOD GLUCOSE LEVELS BEST ACHIEVED IN THE HOSPITAL?

### Role of oral diabetes agents

No large studies have investigated the potential roles of various oral agents on outcomes in hospitalized patients with diabetes. A number of observational studies have commented on the outcomes of patients treated as outpatients with diet alone, oral agents, or insulin. However, the results are variable and the methods cannot account for patient characteristics that would influence clinician selection of the various therapies in the hospital setting. Of the three primary categories of oral agents, secretagogues (sulfonylureas and meglitinides), biguanides, and thiazolidinediones, none have been systematically studied for inpatient use. However, all three groups have characteristics that could impact acute care.





sulfonylureas have other limitations in the inpatient setting. Their long action and predisposition to hypoglycemia in patients not consuming their normal nutrition serve as relative contraindications to routine use in the hospital for many patients (239). Sulfonylureas do not generally allow rapid dose adjustment to meet the changing inpatient needs. Sulfonylureas also vary in duration of action between individuals and likely vary in the frequency with which they induce hypoglycemia (240).

### Metformin

Metformin represents a second agent that individuals are likely to be using as an outpatient, with potential for continuation as an inpatient. There is a suggestion from the UKPDS that metformin may have cardioprotective effects, although the study was not powered to allow for a comparison with sulfonylureas (241).

The major limitation to metformin use in the hospital is a number of specific contraindications to its use, many of which occur in the hospital. All of these contraindications relate to a potentially fatal complication of metformin therapy, lactic acidosis. The most common risk factors for lactic acidosis in metformin-treated patients are cardiac disease, including CHF, hypoperfusion, renal insufficiency, old age, and chronic pulmonary disease (242). In an outpatient setting, using slightly variable criteria, 22–54% of patients treated with metformin have absolute or relative contraindications to its use (242–245). One recent report noted that 27% of patients on metformin in the hospital had at least one contraindication to its use (246). In 41% of these cases, metformin was continued despite the contraindication. This study seemingly underestimates the usual frequency of contraindications since it identified no individuals with CHF, a risk factor that has been frequently noted in many of the outpatient studies. Not surprisingly, a recent review of hospital Medicare data found that 11.2% of patients with concomitant diagnoses of diabetes and CHF were discharged with a prescription of metformin (247).

Recent evidence continues to indicate lactic acidosis is a rare complication, despite the relative frequency of risk factors (248). However, in the hospital, where the risk for hypoxia, hypoperfusion, and renal insufficiency is much higher, it still

seems prudent to avoid the use of metformin in most patients. In addition to the risk of lactic acidosis, metformin has added side effects of nausea, diarrhea, and decreased appetite, all of which may be problematic during acute illness in the hospital.

### Thiazolidinediones

Although thiazolidinediones have very few acute adverse effects (249,250), they do increase intravascular volume, a particular problem in those predisposed to CHF and potentially a problem for patients with hemodynamic changes related to admission diagnoses (e.g., acute coronary ischemia) or interventions common in hospitalized patients. The same study of Medicare patient hospital data cited above (247) found that 16.1% of patients with diabetes and CHF received a prescription for a thiazolidinedione at the time of discharge. Twenty-four percent of patients with these combined diagnoses received either metformin or a thiazolidinedione, both drugs carrying contraindications in this setting.

Most recently it has been demonstrated that when exposed to high concentrations of rosiglitazone, a monolayer of pulmonary artery endothelial cells will exhibit significantly increased permeability to albumin (251). Although this is a preliminary *in vitro* study, it raises the possibility of thiazolidinediones causing a direct effect on capillary permeability. This process may be of greater significance in the inpatient setting. On the positive side, thiazolidinediones may have benefits in preventing restenosis of coronary arteries after placement of coronary stents in patients with type 2 diabetes (252). For inpatient glucose control, however, thiazolidinediones are not suitable for initiation in the hospital because the onset of effect, which is mediated through nuclear transcription, is quite slow.

In summary, each of the major classes of oral agents has significant limitations for inpatient use. Additionally, they provide little flexibility or opportunity for titration in a setting where acute changes demand these characteristics. Therefore, insulin, when used properly, may have many advantages in the hospital setting.

### Use of insulin

As in the outpatient setting, in the hospital a thorough understanding of normal

insulin physiology and the pharmacokinetics of exogenous insulin is essential for providing effective insulin therapy. The inpatient insulin regimen must be matched or tailored to the specific clinical circumstance of the individual patient.

**Components of the insulin dose requirement defined physiologically.** In the outpatient setting, it is convenient to think of the insulin dose requirement in physiologic terms as consisting of “basal” and “prandial” needs. In the hospital, nutritional intake is not necessarily provided as discrete meals. The insulin dose requirement may be thought of as consisting of “basal” and “nutritional” needs. The term “nutritional insulin requirement” refers to the amount of insulin necessary to cover intravenous dextrose, TPN, enteral feedings, nutritional supplements administered, or discrete meals. When patients eat discrete meals without receiving other nutritional supplementation, the nutritional insulin requirement is the same as the “prandial” requirement. The term “basal insulin requirement” is used to refer to the amount of exogenous insulin per unit of time necessary to prevent unchecked gluconeogenesis and ketogenesis.

An additional variable that determines total insulin needs in the hospital is an increase in insulin requirement that generally accompanies acute illness. Insulin resistance occurs due to counterregulatory hormone responses to stress (e.g., surgery) and/or illness and the use of corticosteroids, pressors, or other diabetogenic drugs. The net effect of these factors is an increase in insulin requirement, compared with a nonsick population. This proportion of insulin requirement specific to illness is referred to as “illness” or “stress-related” insulin and varies between individuals (Fig. 2).

**Is the patient insulin deficient or non-insulin deficient?** As in the outpatient setting, a key component to providing effective insulin therapy in the hospital setting is determining whether a patient has the ability to produce endogenous insulin. Patients who have a known history of type 1 diabetes are by definition insulin deficient (3). In addition, other clinical features may be helpful in determining the level of insulin deficiency (Table 2). Patients determined to be insulin deficient require basal insulin replacement to prevent iatrogenic diabetic ketoacidosis, i.e., they must be treated with insulin at all times.



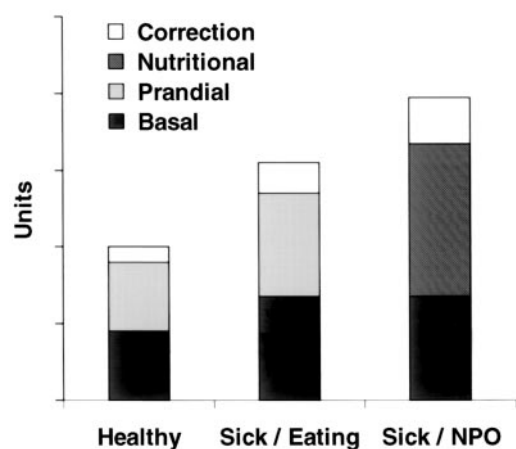

**Figure 2**—Insulin requirements in health and illness. Components of insulin requirement are divided into basal, prandial or nutritional, and correction insulin. When writing insulin orders, the basal and prandial/nutritional insulin doses are written as programmed (scheduled) insulin, and correction-dose insulin is written as an algorithm to supplement the scheduled insulin (see online appendix 2). Programmed and correction insulin are increased to meet the higher daily basal and prandial or nutritional requirements. Total insulin requirements may vary widely.

**Subcutaneous insulin therapy.** Subcutaneous insulin therapy may be used to attain glucose control in most hospitalized patients with diabetes. The components of the daily insulin dose requirement can be met by a variety of insulins, depending on the particular hospital situation. Subcutaneous insulin therapy is subdivided into programmed or scheduled insulin and supplemental or correction insulin (Table 3).

**Scheduled insulin therapy.** This review will use the term “programmed” or “scheduled insulin requirement” to refer to the dose requirement in the hospital necessary to cover the both basal and nutritional needs. For patients who are eating discrete meals, it is appropriate to consider the basal and prandial components of the insulin requirement separately.

**Basal insulin therapy for patients who are eating.** Subcutaneous basal insulin can be provided by any one of several strategies. These include continuous subcutaneous insulin infusion (CSII) or subcutaneous injection of intermediate-acting insulin (including premixed insu-

lin) or of long-acting insulin analogs. Some of these methods result in peaks of insulin action that may exceed the basal needs of the patient, causing hypoglycemia. This is most likely to occur as the acute illness begins to resolve and basal insulin requirements that were elevated due to stress and/or illness begin to return to normal levels. Although selected in part for basal coverage, NPH, lente, and to some extent ultralente insulin also deliver peaks of insulin that potentially can cover prandial needs, albeit with variable capability for matching the timing of nutritional intake. When NPH insulin is used in very low doses, it can also be administered four times daily as an alternate way to provide basal insulin action (253).

**Prandial insulin therapy for patients who are eating.** Prandial insulin replacement has its main effect on peripheral glucose disposal into muscle. Also referred to as “bolus” or “mealtime” insulin, prandial insulin is usually administered before eating. There are occasional situations when this insulin may be injected immediately after eating, such as when it is unclear how much food will be eaten. In such situations, the quantity of carbohydrates taken can be counted and an appropriate amount of rapid-acting analog can be injected. The technique of “carbohydrate counting” may be useful for patients practicing insulin self-management. The rapid-acting insulin analogs, insulin lispro and aspart, are excellent prandial insulins. Regular insulin is more accurately considered to have both basal and prandial components due to its longer duration of action. Similarly, NPH and lente insulins, with their dis-

tinct peaks and prolonged action, can be used for both their basal and prandial insulin effects. For hospitalized patients with severe insulin deficiency, this can be a disadvantage since the timing of meals and the quantity of food is often inconsistent.

**Basal insulin therapy for patients who are not eating.** While not eating, patients who are not insulin deficient may not require basal insulin. Since reduction of caloric intake may alter insulin resistance substantially in type 2 diabetes, sometimes allowing previously insulin-requiring patients to be controlled with endogenous insulin production alone, the basal requirement is not easily determined. However, withholding basal insulin in insulin-deficient patients results in a rapid rise in blood glucose by 45 mg/dl (2.5 mmol/l) per hour until ketoacidosis occurs (rev. in 254). This situation can occur when “sliding scale” insulin therapy is the sole method of insulin coverage (255). Scheduled basal insulin therapy for patients who are not eating can be provided by a number of insulin types and methods.

**Insulin for patients with intermittent nutritional intake.** Hospitalized patients may receive nutrition intermittently, as with patients who are being transitioned between NPO status and regular diet, patients with anorexia or nausea, or patients receiving overnight cycling of enteral feedings. Appropriate insulins used in combination therapy might include regular, intermediate, and long-acting insulins or analogs, administered to cover basal needs and also timed to match the intermittent nutritional intake.

**Illness-related or stress dose insulin therapy.** The illness-related insulin can be apportioned between the basal insulin, the nutritional or prandial insulin, and the correction doses. It is important to point out that illness-related insulin requirements decrease as the patient's condition improves and, thus, in many situations may be difficult to precisely replace (Fig. 2). In attempting to meet the illness-related insulin requirement, and to later return to lower doses, it is important to recall that intravenous insulin infusion gives the greatest flexibility and that long-acting analog gives the least, with other preparations or routes being intermediate. Rapid changes in illness-related insulin requirements necessitate close blood glucose monitoring and daily

**Table 2**—Clinical characteristics of the patient with insulin deficiency

- Known type 1 diabetes
- History of pancreatotomy or pancreatic dysfunction
- History of wide fluctuations in blood glucose levels
- History diabetic ketoacidosis
- History of insulin use for >5 years and/or a history of diabetes for >10 years

Adapted from the Expert Committee on the Diagnosis and Classification of Diabetes Mellitus (3) and consensus from the authors.

Table 3—Practical guidelines for hospital use of insulin

| Clinical setting                                                                                  | Programmed/scheduled insulin option(s)                                                                                                                                                                                                            |                                                                                                                                                                                        | Supplemental/correction-insulin option(s)                                                                        | Comments                                                                                                                                                                                                                                                                                                                                                                                                                                                                                                                                                                                                                                                                                                                                                                                                                                                                                                                                                                                                                    |
|---------------------------------------------------------------------------------------------------|---------------------------------------------------------------------------------------------------------------------------------------------------------------------------------------------------------------------------------------------------|----------------------------------------------------------------------------------------------------------------------------------------------------------------------------------------|------------------------------------------------------------------------------------------------------------------|-----------------------------------------------------------------------------------------------------------------------------------------------------------------------------------------------------------------------------------------------------------------------------------------------------------------------------------------------------------------------------------------------------------------------------------------------------------------------------------------------------------------------------------------------------------------------------------------------------------------------------------------------------------------------------------------------------------------------------------------------------------------------------------------------------------------------------------------------------------------------------------------------------------------------------------------------------------------------------------------------------------------------------|
|                                                                                                   | Basal                                                                                                                                                                                                                                             | Prandial and/or nutritional                                                                                                                                                            |                                                                                                                  |                                                                                                                                                                                                                                                                                                                                                                                                                                                                                                                                                                                                                                                                                                                                                                                                                                                                                                                                                                                                                             |
| Eating meals                                                                                      | <ul style="list-style-type: none"> <li>• Int-1 bid or hs</li> <li>• LA-1 hs or am</li> <li>• Insulin drip</li> </ul>                                                                                                                              | <ul style="list-style-type: none"> <li>• Reg-1 or rapid-1 ac—B&amp;D or B, L, and D</li> </ul>                                                                                         | <ul style="list-style-type: none"> <li>• Reg-1 or rapid-1 ac +/- hs</li> </ul>                                   | <ul style="list-style-type: none"> <li>• Total daily insulin requirement may be calculated based on prior insulin doses or as <math>0.6 \text{ units} \cdot \text{kg}^{-1} \cdot \text{day}^{-1}</math></li> <li>• Basal insulin generally accounts for 40–50% of daily insulin requirement</li> <li>• Prandial and/or nutritional or supplemental/correction doses may be calculated as 10–20% of total daily insulin requirement for each dose</li> <li>• Patients with type 1 diabetes always require continuous insulin coverage to avoid ketosis</li> <li>• Give Reg-1, 30–45 min ac; rapid-1, 0–15 min ac</li> <li>• Glargine given as once-daily dose, usually at hs</li> <li>• Avoid/minimize Reg-1 and rapid-1 doses at hs to decrease risk of nocturnal hypoglycemia</li> <li>• 70/30 or 75/25 insulin may be used as breakfast and dinner to meet both basal and prandial needs</li> <li>• Insulin drip is Rx of choice in severely decompensated type 1, with or without DKA, and in type 2 with HHS</li> </ul> |
| Not eating                                                                                        | <ul style="list-style-type: none"> <li>• Insulin drip</li> <li>• Int-1 bid or hs</li> <li>• LA-1 hs or am</li> </ul>                                                                                                                              | N/A                                                                                                                                                                                    | <ul style="list-style-type: none"> <li>• Reg-1 q 4–6 hours</li> <li>• Rapid-1 q 4 hours</li> </ul>               |                                                                                                                                                                                                                                                                                                                                                                                                                                                                                                                                                                                                                                                                                                                                                                                                                                                                                                                                                                                                                             |
| Perioperative or periprocedural                                                                   |                                                                                                                                                                                                                                                   |                                                                                                                                                                                        |                                                                                                                  |                                                                                                                                                                                                                                                                                                                                                                                                                                                                                                                                                                                                                                                                                                                                                                                                                                                                                                                                                                                                                             |
| Will eat post-op or postprocedure (e.g., cataract extraction, cardiac catheterization, endoscopy) | Base on prior insulin Rx: <ul style="list-style-type: none"> <li>• Int-1 give 1/2–2/3 usual am dose</li> <li>• LA-1 glargine, continue usual dose pm prior</li> </ul>                                                                             | When resumes eating <ul style="list-style-type: none"> <li>• Restart prior doses of Reg-1 or rapid-1 ac</li> </ul>                                                                     | Until resumes eating: <ul style="list-style-type: none"> <li>• Reg-1 q 4–6 h</li> <li>• Rapid-1 q 4 h</li> </ul> | <ul style="list-style-type: none"> <li>• Usual insulin and/or oral agent doses given the night prior to surgery to assure adequate glycemic control on the morning of the procedure</li> <li>• Patients with diabetes should be on the OR list for the early morning to minimize amount of time that they will be kept NPO. This decreases risk of hypoglycemia and allows maintenance of optimum metabolic homeostasis</li> <li>• Where a prolonged postoperative npo period is anticipated, e.g., cardiothoracic, major abdominal, CNS cases, insulin drip Rx is recommended</li> <li>• Starting dose for perioperative maintenance insulin drip is <math>0.2 \text{ units} \cdot \text{kg}^{-1} \cdot \text{h}^{-1}</math></li> </ul>                                                                                                                                                                                                                                                                                    |
| Will not eat (e.g., major surgery)                                                                | <ul style="list-style-type: none"> <li>• Insulin drip</li> <li>• Reg-1 q 4–6 hours</li> <li>• Rapid-1 q 4 hours</li> <li>• Int-1, give 1/2 usual am dose</li> <li>• LA-1 glargine, give usual daily dose</li> </ul>                               | N/A                                                                                                                                                                                    | Until resumes eating: <ul style="list-style-type: none"> <li>• Reg-1 q 4–6 h</li> <li>• Rapid-1 q 4 h</li> </ul> |                                                                                                                                                                                                                                                                                                                                                                                                                                                                                                                                                                                                                                                                                                                                                                                                                                                                                                                                                                                                                             |
| ICU                                                                                               | If npo and/or clinically unstable: <ul style="list-style-type: none"> <li>• Insulin drip</li> <li>• Reg-1 q 4–6 h</li> <li>• Rapid-1 q 4 h</li> </ul> If eating: <ul style="list-style-type: none"> <li>• Continue prior Int-1 or LA-1</li> </ul> | If npo: <ul style="list-style-type: none"> <li>• N/A</li> </ul> If eating: <ul style="list-style-type: none"> <li>• Reg-1 or RA-1 ac and hs</li> </ul>                                 | <ul style="list-style-type: none"> <li>• Reg-1 q 4–6 h</li> <li>• Rapid-1 q 4 h</li> </ul>                       | <ul style="list-style-type: none"> <li>• Evidence-based outcomes studies support use of insulin drip as Rx of choice for decompensated diabetes in the ICU setting including coronary care (acute myocardial infarction) and surgical intensive care units (Malmberg, Van den Bergh, Fumary)</li> </ul>                                                                                                                                                                                                                                                                                                                                                                                                                                                                                                                                                                                                                                                                                                                     |
| Enteral tube feeding                                                                              |                                                                                                                                                                                                                                                   |                                                                                                                                                                                        |                                                                                                                  |                                                                                                                                                                                                                                                                                                                                                                                                                                                                                                                                                                                                                                                                                                                                                                                                                                                                                                                                                                                                                             |
| Continuous                                                                                        | 24 h: <ul style="list-style-type: none"> <li>• Int-1 bid;</li> <li>• LA-1 hs or am</li> </ul> Daytime only: <ul style="list-style-type: none"> <li>• Int-1 am</li> </ul>                                                                          | During tube feeding delivery period only: <ul style="list-style-type: none"> <li>• Reg-1 q 4–6 h</li> <li>• Rapid-1 q 4 h</li> <li>• Reg-1 q 4–6 h</li> <li>• Rapid-1 q 4 h</li> </ul> | <ul style="list-style-type: none"> <li>• Reg-1 q 4–6 hours</li> <li>• Rapid-1 q 4 hours</li> </ul>               | <ul style="list-style-type: none"> <li>• Basal insulin dose generally no more than 40% of total daily insulin requirement to avoid hypoglycemia if enteral feeding interrupted</li> <li>• Nutritional insulin requirements met with programmed doses of reg-1 or rapid-1</li> <li>• May use low-dose int-1 at hs to control fasting hyperglycemia</li> <li>• If tube feeding interrupted, e.g., for procedure or intolerance, increase frequency of fingerstick BG checks</li> </ul>                                                                                                                                                                                                                                                                                                                                                                                                                                                                                                                                        |
| Bolus                                                                                             | 24 h: <ul style="list-style-type: none"> <li>• Int-1 bid;</li> <li>• LA-1 hs or am</li> </ul>                                                                                                                                                     |                                                                                                                                                                                        | <ul style="list-style-type: none"> <li>• Reg-1 q 4–6 h</li> <li>• Rapid-1 q 4 h</li> </ul>                       | <ul style="list-style-type: none"> <li>• Give reg-1, 30–45 mins, or rapid-1, 0–15 mins prior to bolus to control post-bolus BG excursions</li> <li>• Check finger stick BG 2 h after reg-1 or 1 h after rapid-1 to determine dose adjustments for post-bolus target BG &lt; 180 mg/dl</li> <li>• May use low-dose int-1 at hs to control fasting hyperglycemia</li> </ul>                                                                                                                                                                                                                                                                                                                                                                                                                                                                                                                                                                                                                                                   |

| Bolus (cont.)               | Daytime only:                                                                              | During bolus delivery period only:                                                                                                           |                                                                                                                                                                                                                                                                                                                                                                                                                                                                                                                                                                                                                                                                                                                                                                                                                                                                                                                                                                                                                                                                                                                                                                                                                          |
|-----------------------------|--------------------------------------------------------------------------------------------|----------------------------------------------------------------------------------------------------------------------------------------------|--------------------------------------------------------------------------------------------------------------------------------------------------------------------------------------------------------------------------------------------------------------------------------------------------------------------------------------------------------------------------------------------------------------------------------------------------------------------------------------------------------------------------------------------------------------------------------------------------------------------------------------------------------------------------------------------------------------------------------------------------------------------------------------------------------------------------------------------------------------------------------------------------------------------------------------------------------------------------------------------------------------------------------------------------------------------------------------------------------------------------------------------------------------------------------------------------------------------------|
|                             | <ul style="list-style-type: none"> <li>● Int-I am</li> </ul>                               | <ul style="list-style-type: none"> <li>● Reg-I q 4–6 h</li> </ul>                                                                            | <ul style="list-style-type: none"> <li>● Basal and nutritional insulin needs met with reg-I added to TPN bag directly</li> <li>● To determine daily dose of insulin to add to TPN bag, consider use of separate IV insulin infusion for 24 h to determine daily insulin requirement, then add 2/3 of this amount to subsequent TPN bags; or add 2/3 of total units of insulin administered SQ the previous day to the next day's TPN bag as reg-I, until daily dose determined</li> <li>● Use SQ insulin with caution with TPN. Lack of correlation of insulin peaks and troughs with nutrient delivery may lead to erratic BG control</li> <li>● Give reg-I, 30–45 min or rapid-I 0–15 min prior to meal to control postprandial BG excursions</li> <li>● Postprandial target BG &lt; 180 mg/dl</li> <li>● Check fingerstick BG 2 h after reg-I or 1 h after rapid-I to determine prandial insulin dose adjustments</li> <li>● High-dose glucocorticoids raise insulin requirements</li> <li>● Adjust/increase insulin doses to counter postprandial hyperglycemia and BG peak that may occur 8–12 h following once-daily GC dose</li> <li>● Alternate-day steroid doses require alternate-day insulin doses</li> </ul> |
| TPN                         | <ul style="list-style-type: none"> <li>● Reg-I added to TPN bags</li> </ul>                | <ul style="list-style-type: none"> <li>● Reg-I q 4–6 h</li> </ul>                                                                            |                                                                                                                                                                                                                                                                                                                                                                                                                                                                                                                                                                                                                                                                                                                                                                                                                                                                                                                                                                                                                                                                                                                                                                                                                          |
| Transition to oral intake   | <ul style="list-style-type: none"> <li>● Int-I bid</li> <li>● LA-I hs or am</li> </ul>     | <ul style="list-style-type: none"> <li>● Reg-I or rapid-I ac</li> </ul>                                                                      |                                                                                                                                                                                                                                                                                                                                                                                                                                                                                                                                                                                                                                                                                                                                                                                                                                                                                                                                                                                                                                                                                                                                                                                                                          |
| High-dose glucocorticoid Rx | <ul style="list-style-type: none"> <li>● Insulin drip; Int-I bid; LA-I hs or am</li> </ul> | <ul style="list-style-type: none"> <li>Reg-I or rapid-I:</li> <li>● ac (B and D) or ac (B, L, and D) if eating; or q 4–6 h if NPO</li> </ul> |                                                                                                                                                                                                                                                                                                                                                                                                                                                                                                                                                                                                                                                                                                                                                                                                                                                                                                                                                                                                                                                                                                                                                                                                                          |

ac, before meals; am, morning; B, breakfast; BG, blood glucose; D, dinner; DKA, diabetic ketoacidosis; GC, glucocorticoid; HHS, hyperglycemic hyperosmolar state; hs, bedtime; I, insulin; Int-I, intermediate acting insulin (NPH or Lente); IV, intravenous; L, lunch; LA-I, long-acting insulin (glargine or ultralente); OR, operating room; q, every; qd, every day; rapid-I, rapid acting insulin (lispro or aspart); Reg-I, regular insulin; SQ, subcutaneous.

changes in the scheduled insulin doses, as the blood glucose levels dictate.

**Correction-dose insulin therapy.** Also called “supplemental” insulin, this usually refers to the insulin used to treat hyperglycemia that occurs before meals or between meals. At bedtime, correction-dose insulin is often administered in a reduced dose compared with other times of the day in order to avoid nocturnal hypoglycemia. Correction-dose insulin may also refer to insulin used to correct hyperglycemia in the NPO patient or in the patient who is receiving scheduled nutritional and basal insulin but not eating discrete meals. Correction-dose insulin should not be confused with “sliding scale insulin,” which usually refers to a set amount of insulin administered for hyperglycemia without regard to the timing of the food, the presence or absence of preexisting insulin administration, or even individualization of the patient’s sensitivity to insulin.

The traditional sliding scale insulin regimens, usually consisting of regular insulin without any intermediate or long-acting insulins, have been shown to be ineffective at best and dangerous at worst (255–257). Problems cited with sliding scale insulin regimens are that the sliding scale regimen prescribed on admission is likely to be used throughout the hospital stay without modification (255). Second, sliding scale insulin therapy treats hyperglycemia after it has already occurred, instead of preventing the occurrence of hyperglycemia. This “reactive” approach can lead to rapid changes in blood glucose levels, exacerbating both hyperglycemia and hypoglycemia.

Correction-dose insulin therapy is an important adjunct to scheduled insulin, both as a dose-finding strategy and as a supplement when rapid changes in insulin requirements lead to hyperglycemia. If correction doses are frequently required, it is recommended that the scheduled insulin doses be increased the following day to accommodate the increased insulin needs.

**Writing insulin orders.** An example of an insulin order form that prompts the physician to address all three components of insulin therapy (i.e., basal, prandial, and correction dose) is provided (see online appendix 1 [available at <http://care.diabetesjournals.org>]). The forms can be incorporated into computerized order sets and other prompting methods

**Table 4—Indication for intravenous insulin infusion among nonpregnant adults with established diabetes or hyperglycemia**

| Indication                                                                                                                     | Strength of Evidence |
|--------------------------------------------------------------------------------------------------------------------------------|----------------------|
| Diabetic ketoacidosis and nonketotic hyperosmolar state                                                                        | A                    |
| General preoperative, intraoperative, and postoperative care                                                                   | C                    |
| Postoperative period following heart surgery                                                                                   | B                    |
| Organ transplantation                                                                                                          | E                    |
| MI or cardiogenic shock                                                                                                        | A                    |
| Stroke                                                                                                                         | E                    |
| Exacerbated hyperglycemia during high-dose glucocorticoid therapy                                                              | E                    |
| NPO status in type 1 diabetes                                                                                                  | E                    |
| Critically ill surgical patient requiring mechanical ventilation                                                               | A                    |
| Dose-finding strategy, anticipatory to initiation or reinitiating of subcutaneous insulin therapy in type 1 or type 2 diabetes | C                    |

to reduce errors. Practice guidelines for using insulin under various clinical circumstances are summarized in Table 3.

**Intravenous insulin infusion.** The only method of insulin delivery specifically developed for use in the hospital is continuous intravenous infusion, using regular crystalline insulin. There is no advantage to using insulin lispro or aspart in an intravenous insulin infusion. The medical literature supports the use of intravenous insulin infusion in preference to the subcutaneous route of insulin administration for several clinical indications among nonpregnant adults, including diabetic ketoacidosis and nonketotic hyperosmolar state (258–275); general preoperative, intraoperative, and postoperative care (257,276–290); the postoperative period following heart surgery (142,196,198, 290,291); organ transplantation (297); or cardiogenic shock (128,194,292–296) and possibly stroke (147); exacerbated hyperglycemia during high-dose glucocorticoid therapy (297); NPO status (298); critical care illness (2,299–301); and as a dose-finding strategy, anticipatory to initiation or reinitiation of subcutaneous insulin therapy in type 1 or type 2 diabetes (Table 4) (302–304). Some of these settings may be characterized by, or associated with, severe or rapidly changing insulin requirements, generalized patient edema, impaired perfusion of subcutaneous sites, requirement for pressor support, and/or use of total parenteral nutrition. In these settings the intravenous route for insulin administration surpasses the subcutaneous route with respect to rapidity of onset of effect in controlling hyperglycemia, overall ability

to achieve glycemic control, and most importantly, nonglycemic patient outcomes. During intravenous insulin infusion used to control hyperglycemic crises, hypoglycemia (if it occurs) is short-lived, whereas in the same clinical settings repeated administration of subcutaneous insulin may result in “stacking” of the insulin’s effect, causing protracted hypoglycemia. As an alternative to continuous intravenous infusion, repeated intravenous bolus therapy also has been advocated for patients with type 2 diabetes during anesthesia (305).

Depending on the indication for intravenous insulin infusion, caregivers may establish different glycemic thresholds for initiation of intravenous insulin therapy. For patients not hyperglycemic initially, it is best to assign a blood glucose threshold for initiation of the insulin infusion that is below the upper limit of the target range glucose at which the infusion protocol aims. For patients with type 1 diabetes, uninterrupted intravenous insulin infusion perioperatively is an acceptable and often the preferred method of delivering basal insulin. For these patients, intravenous insulin infusion therapy should be started before the end of the anticipated timeframe of action of previously administered subcutaneous insulin, i.e., before hyperglycemia or ketosis can develop. For patients having elective surgery, hourly measurements of capillary blood glucose may be ordered, and the intravenous infusion of insulin may be initiated at a low hourly rate when rising blood glucose levels ( $>120$  mg/dl, or  $6.7$  mmol/l) indicate waning of the effects of previously administered intermediate or

long-acting insulin. The desirability of infusing dextrose simultaneously depends on the blood glucose concentration and the condition for which the insulin infusion is being used (275,288).

**Mixing the insulin infusion.** Depending on availability of infusion pumps that accurately deliver very low hourly volumes, intravenous insulin therapy is conducted with regular crystalline insulin in a solution of 1 unit per 1 ml normal saline. The concentrated infusion is piggybacked into a dedicated running intravenous line. Highly concentrated solutions may be reserved for patients requiring volume restriction; otherwise, solutions as dilute as 1 unit insulin per 10 ml normal saline may be used (306,307). When the more dilute solutions are used, at least 50 ml of the insulin-containing solution should be allowed to run through the tubing before use (308). It is prudent to prepare and label the solutions in a central institutional pharmacy, if possible using the same concentration for all adult patients.

The use of a “priming bolus” to initiate intravenous insulin infusion is controversial (265). The half-life of an intravenous insulin bolus is about 4–5 min (309), and, although tissue effects are somewhat delayed, by 45 min insulin blood levels return virtually to baseline. Because repeated intravenous bolus insulin therapy does not maintain adequate blood insulin levels or target tissue action of insulin, the initial priming bolus of intravenous insulin, if used, must be followed by maintenance insulin infusion therapy (310,311).

**Insulin infusion initiation.** Commonly, for unstressed normoglycemic adults of average BMI, insulin infusion is initiated at 1 unit/h but adjusted as needed to maintain normoglycemia (i.e., the perioperative setting). The assumption that ~50% of the ambulatory daily insulin dose is the basal requirement can also be used to estimate initial hourly requirements for a normoglycemic, unstressed patient previously treated with insulin (312). Alternatively, a weight-based insulin dose may be calculated using  $0.02 \text{ units} \cdot \text{kg}^{-1} \cdot \text{h}^{-1}$  as a starting rate. A lower initial insulin infusion rate may be used for patients with low body weight or renal or hepatic failure or if the infusion is started within the timeframe of action of previously administered subcutaneous insulin. A higher initiation rate



such as  $\geq 2$  units/h may be used when hyperglycemia is present, when preadmission insulin requirements are high, or if the patient has conditions predicting the presence of insulin resistance. Among hyperglycemic type 1 and type 2 diabetic patients who were otherwise well and receiving no concomitant intravenous dextrose, the prime determinants of the initial hourly intravenous insulin requirement are the initial plasma glucose and BMI. After attainment of normoglycemia, only the BMI correlates with the hourly insulin infusion requirement (313). It has been argued that the maximum biologic effect of insulin might be expected at infusion rates of 10 units/h or less. However, some patients benefit from higher infusion rates according to setting, and use of hourly insulin infusion rates as high as 50 units/h has been reported, particularly in the intensive care setting (2).

Assignment and adjustment of the intravenous insulin infusion rate is determined by the caregiver, based on knowledge of the condition of the patient, the blood glucose level, and the response to previous therapy. Blood glucose determinations should be performed hourly until stability of blood glucose level has been demonstrated for 6–8 h; then, the frequency of blood glucose testing can be reduced to every 2–3 h. To avoid unwanted excursions of blood glucose, especially when making corrective changes in the insulin infusion rate, the pharmacodynamics of intravenous insulin administration and delay of tissue responsiveness following attainment of a given blood level of insulin must be considered. If concomitant infusion of dextrose is used, caregivers must be alert to the effects of abrupt changes of dextrose infusion rate. Well-conducted insulin infusion therapy should demonstrate progressively smaller oscillations of the hourly insulin infusion rate and narrower excursions of blood glucose, as the caregiver discovers the hourly rate that will maintain normoglycemia for a given patient.

Many institutions use insulin infusion algorithms that can be implemented by nursing staff (2,189,194,197,200,280,298,301,304,307,314). Algorithms should incorporate the concept that maintenance requirements differ between patients and change over the course of treatment. The algorithm should facilitate communication between physicians and nurses, achieve correction of hyperglyce-

mia in a timely manner, provide a method to determine the insulin infusion rate required to maintain blood sugars within a defined target range, include a rule for making temporary corrective increments or decrements of insulin infusion rate without under- or overcompensation, and allow for adjustment of the maintenance rate as patient insulin sensitivity or carbohydrate intake changes. The algorithm should also contain directions as to how to proceed if hypoglycemia or a rapid fall in blood glucose occurs, as well as instructions as to how to transition the patient to scheduled subcutaneous insulin.

Physician orders to “titrate drip” to a given target blood glucose range, or protocols requiring application of mathematical rules by nursing staff, may be difficult to implement. A mathematical algorithm can be reduced to tabular form, in which each column indicates different insulin infusion rates necessary to maintain target range control and shows appropriate infusions rates necessary for correction at given blood glucose levels, accompanied by a rule for shifting between columns (see online appendix 2 [available at <http://care.diabetesjournals.org>]) (314). It is prudent to provide inservice teaching of pharmacy, nursing, and physician staff on the use of insulin drip protocols (307).

**Transition from intravenous to subcutaneous insulin therapy.** To maintain effective blood levels of insulin, it is necessary to administer short- or rapid-acting insulin subcutaneously 1–2 h before discontinuation of the intravenous insulin infusion (191,199,315–319). An intermediate or long-acting insulin must be injected 2–3 h before discontinuing the insulin infusion. In transitioning from intravenous insulin infusion to subcutaneous therapy, the caregiver may order subcutaneous insulin with appropriate duration of action to be administered as a single dose or repeatedly to maintain basal effect until the time of day when the choice of insulin or analog preferred for basal effect normally would be provided. For example, a patient who normally uses glargine at bedtime and lispro before meals, and whose insulin infusion will be stopped at lunchtime, could receive a dose of lispro and a one-time injection of NPH before interruption of the insulin infusion.

**Initial scheduled insulin, dose decisions, and correction-dose calcula-**

**tions.** The initial doses of scheduled subcutaneous insulin are based on previously established dose requirements, previous experience for the same patient during similar circumstances of nutritional change or drug administration, requirements during continuous insulin infusion (if stable), knowledge of stability or instability of medical condition and nutritional intake, assessment of medical stress, and/or body weight. Correction doses for various ranges of total daily insulin requirement or body weight can be expressed in tabular form, as a component of standardized inpatient orders (see online appendix 1). For most insulin-sensitive patients, 1 unit of rapid-acting insulin will lower blood glucose by 50–100 mg/dl (2.8–5.6 mmol) (320). A reduction of the correction dose at bedtime is appropriate to reduce the risk of nocturnal hypoglycemia. For patients whose insulin requirements are unknown and whose nutritional intake will be adequate, an assumption concerning requirement for scheduled insulin based on body weight would be about 0.5–0.7 units/kg insulin per 24-h period for patients having type 1 diabetes and 0.4–1.0 units/kg or more for patients having type 2 diabetes, starting low and working up to the dose to meet demonstrated needs, with assignment of a corresponding scale for correction doses. If nutritional intake is severely curtailed, for type 1 diabetes the amount of scheduled insulin calculated by body weight should be reduced by 50%. For type 2 diabetes, a safe initial assumption in the absence of nutritional intake would be that endogenous insulin might meet needs, requiring supplementation only with correction doses, until results of monitoring indicate the further need for scheduled insulin.

**Perioperative insulin requirements.** In the perioperative period for all type 1 diabetic patients and for those type 2 diabetic patients with demonstrated insulin deficiency, scheduled insulin intended to provide basal coverage should be administered on the night before surgery to assure optimum fasting blood glucose for the operative room. If insulin intended to meet basal needs is normally administered in the morning, in the case of type 1 diabetes the morning basal insulin is given without dose adjustment, and in the case of type 2 diabetes 50–100% of the basal insulin is administered on the morning of surgery. Correction doses may be

applied on the morning of surgery if the morning glucose concentration exceeds 180 mg/dl.

**Appropriate use of insulin self-management.** Recognition of the patient rights, patient responsibilities, and the importance of patient-oriented care are critical to the care of diabetes (321–323). In the ambulatory setting, patient self-management has a favorable impact on glycemic control and quality of life (324,325). Using the tools of multiple daily injections of insulin or CSII, patient self-management has been shown to be capable of improving glycemic control and microvascular outcomes (326–328). In multiple-dose insulin therapy, meal-time treatment with rapid-acting insulin analog improves hypoglycemia and postprandial hyperglycemia in comparison with conventional therapy in both type 2 (329) and type 1 diabetes (253,330–332). In comparison with conventional management using intermediate-acting insulin for basal effect, patients using long-acting insulin analog for basal insulin effect experience less overall or nocturnal hypoglycemia (333–336), better control of fasting plasma glucose levels (333,337), and lower HbA<sub>1c</sub> levels (333). In CSII therapy, rapid-acting analogs improve control for most patients (338–340). Use of advanced carbohydrate counting and an insulin-to-carbohydrate ratio have markedly enhanced the success of patients to implement intensive self-management (341). Patients familiar with their own needs sometimes have experienced adverse events or, perceiving threat of adverse events, express frustration with rigidity of hospital routine and delegation of decision making to providers who are less likely to understand their immediate needs.

Self-management in the hospital may be appropriate for competent adult patients who have stable level of consciousness and reasonably stable known daily insulin requirements and successfully conduct self-management of diabetes at home, have physical skills appropriate to successfully self-administer insulin, perform self-monitoring of blood glucose, and have adequate oral intake. Appropriate patients are those already proficient in carbohydrate counting, use of multiple daily injections of insulin or insulin pump therapy, and sick-day management. The patient and physician in consultation with nursing staff must agree that patient

self-management is appropriate under the conditions of hospitalization. Components of the program can include a physician order for self-management with respect to selection of food from a general diet, self-monitoring of blood glucose, self-determination and administration of insulin dose, and ranges of insulin to be taken. Patient record-keeping, sharing of results with nursing staff, and charting by nursing staff of self-determined glucose results and insulin administration should occur. If a subcutaneous insulin pump is used, provisions for assistance in troubleshooting pump problems need to be in place. Assistance might be required if equipment familiar to the patient is unavailable, if refrigeration is required, or if physical autonomy is imperfect. For example, decision making about dosage may be intact, but manual dexterity or availability of easily reached injection sites may be altered by the conditions of hospitalization. Additionally, help may be required in a situation of increasing insulin resistance or period of NPO where the patient may not know how to adjust his or her insulin doses appropriately.

Although the program should be developed in compliance with institutional and external regulatory requirements, consideration should be given to permitting self-use of equipment and drugs already in the possession of the patient but not normally on formulary. The program should not create additional burdens for dietary or nursing staff. As one of the likely barriers to implementation, institutions should recognize that fear of not only causing patient harm, but also of exposure of deficiencies of knowledge and skill, may underlie staff resistance to patient self-management programs. Staff may be trained in advance to understand that proficiency in making intensive management decisions or using specialized equipment is not expected of them by either their employer or the patient. Orders to replace self-management with provider-directed care should be written when changing the condition of the patient makes self-management inappropriate (342). Table 5 summarizes the components necessary for diabetes self-management.

### Preventing hypoglycemia

Hypoglycemia, especially in insulin-treated patients, is the leading limiting factor in the glycemic management of

**Table 5—Components for safe diabetes self-management in the hospital**

- Perform simultaneous laboratory-measured capillary or venous blood test and patient-performed capillary blood glucose test. The capillary blood glucose test should be  $\pm 15\%$  of the laboratory test.
- Demonstration that the patient can self-administer insulin accurately.
- Patient is alert and is able to make appropriate decisions on insulin dose.
- All insulin administered by the patient and nurse is recorded in the medication record.
- Physician writes order that the patient may perform insulin self-management.

type 1 and type 2 diabetes (343–347). In the hospital, multiple additional risk factors for hypoglycemia are present, even among patients who are neither “brittle” nor tightly controlled. Patients who do not have diabetes may experience hypoglycemia in the hospital, in association with factors such as altered nutritional state, heart failure, renal or liver disease, malignancy, infection, or sepsis (348). Patients having diabetes may develop hypoglycemia in association with the same conditions (349). Additional triggering events leading to iatrogenic hypoglycemia include sudden reduction of corticosteroid dose; altered ability of the patient to self-report symptoms; reduction of oral intake; emesis; new NPO status; reduction of rate of administration of intravenous dextrose; and unexpected interruption of enteral feedings or parenteral nutrition. Under-prescribing needed maintenance antihyperglycemic therapy is not always fully protective against such causes of hypoglycemia. Nevertheless, fear of hypoglycemia may contribute to inadequate prescribing of scheduled diabetes therapy or inappropriate reliance upon “sliding scale” monotherapy (255,256,350).

Despite the preventable nature of many inpatient episodes of hypoglycemia, institutions are more likely to have nursing protocols for treatment of hypoglycemia than for its prevention (351–359). Nursing and pharmacy staff must remain alert to the effects of antihyperglycemic therapy that may have been administered on a previous shift. Various conditions creating a high risk for hypoglycemia are listed in Table 6. If identified,

**Table 6—Conditions creating high risk for hypoglycemia in patients receiving scheduled (programmed) insulin**

- Sudden NPO status or reduction in oral intake
- Enteral feeding discontinued
- TPN or intravenous dextrose discontinued
- Premal insulin given and meal not ingested
- Unexpected transport from nursing unit after rapid-action insulin given
- Reduction in corticosteroid dose

preventive strategies could potentially include a provision, under protocol or by physician order, to perform blood glucose testing more frequently and, for falling levels, to take preventive action.

### Special situations: TPN

Hyperglycemia in patients without diabetes from TPN is based on a variety of factors—age (360), severity of illness (361), and the rate of dextrose infusion (362)—all of which affect the degree of hyperglycemia. In individuals with preexisting type 2 diabetes not previously receiving insulin therapy, 77% of patients required insulin to control glycemia during TPN (363). Insulin doses in this group averaged  $100 \pm 8$  units/day.

There are no controlled trials examining which strategies are best for this situation. Adding incremental doses of insulin to the TPN is one option, but this may require days to determine the correct insulin dose (306). The use of a separate intravenous insulin infusion brings most patients within target within 24 h (364). Two-thirds to 100% of the total number of units of insulin used in the variable rate infusion over the previous 24-h period can subsequently be added to the subsequent TPN bag(s) (306,365).

### Special situations: glucocorticoid therapy

Glucocorticoids are well known to affect carbohydrate metabolism. They increase hepatic glucose production, inhibit glucose uptake into muscle, and have a complex effect on  $\beta$ -cell function (366–368). The decrease in glucose uptake with glucocorticoids seems to be the major early defect (369,370), and thus it is not surprising that for hospitalized patients with well-controlled type 2 diabetes, postprandial hyperglycemia is the most significant

problem. Although in some patients the hyperglycemia, if present, may be mild, in others the glucocorticoids may be responsible for hyperosmolar hyperglycemic syndrome (371). The best predictors of glucocorticoid-induced diabetes are family history of diabetes, increasing age, and glucocorticoid dose.

There are few studies examining how to best treat glucocorticoid-induced hyperglycemia. Thiazolidinediones may be effective for long-term treatment with glucocorticoids (372), but no insulin sensitizer would be appropriate for the initial management of acute hyperglycemia in the hospital due to the fact their antihyperglycemic effects will take weeks to occur. There is also an uncontrolled report suggesting that chromium may be beneficial for this population (373). Insulin is recommended as the drug of choice for the treatment of glucocorticoid-induced hyperglycemia. Although data are not available, due to the effect of glucocorticoids on postprandial glucose, an emphasis on the use of prandial insulin would be expected to have the best results. For patients receiving high-dose intravenous glucocorticoids, an intravenous insulin infusion may be appropriate (306). The insulin dose requirements are extremely difficult to predict, but with the insulin infusion it is possible to quickly reach the required insulin dosing. Furthermore, for short glucocorticoid boluses of no more than 2 or 3 days, the insulin infusion allows appropriate tapering of insulin infusion rates so that glycemic control is not compromised and hypoglycemic risks can be minimized as steroid doses are reduced. It should be emphasized that if intravenous insulin is not used, there will be a greater increase in prandial compared with basal insulin doses. There are no trials comparing the use of insulin lispro or insulin aspart to regular insulin for this situation.

### Special situations: enteral feeding

Current enteral nutrition formulas are generally high in carbohydrate (with an emphasis on low-molecular weight carbohydrates) and low in fat and dietary fiber. Carbohydrates contribute 45–92% of calories (374). There are a variety of different protein sources in these enteral feedings, and there are no contraindications for use of any of these in people with diabetes. Generally, enteral formulas contain 7–16% of total calories from protein.

For most institutionalized patients, it is recommended that protein intake should be  $1.2\text{--}1.5 \text{ g} \cdot \text{kg}^{-1} \cdot \text{day}^{-1}$  (375). Most currently available standard formulas contain 25–40% of total calories from fat. There is current controversy as to how much of this fat source should be from n-3 compared with n-6 fatty acids. Not surprisingly, products that are lower in carbohydrate and higher in dietary fiber and fat have less of an impact on diabetes control (376,377).

There is only one study reporting glycemic outcomes for people with type 2 diabetes receiving different enteral formulas (378). Thirty-four patients were randomized to a reduced-carbohydrate, modified fat enteral formula or a standard high-carbohydrate feeding. After 3 months,  $\text{HbA}_{1c}$  levels were lower for the group receiving the reduced-carbohydrate formula, but this did not reach statistical significance. For those randomized to the high-carbohydrate formula, HDL cholesterol levels were lower and triglyceride concentrations were higher. Interestingly, in this small study, the group receiving the reduced-carbohydrate formula had 10% fewer infections.

There are no clinical trial data examining different strategies of insulin replacement for this population. For intermittent enteral feedings such as nocturnal tube feeding, NPH insulin, usually with a small dose of regular insulin, works well. The NPH insulin provides basal insulin coverage, while the regular insulin is administered before each tube feeding to control postprandial glucose levels. Doses should be calculated based on capillary glucose testing before and 2 h after each enteral feeding period. Continuous feeding may be managed by several different strategies; again, however, there are no data that have examined these management strategies. One could use once- or twice-daily insulin glargine. Ideally, one would start with a small basal dose and use correction-dose insulin as needed while the glargine dose is being increased. Alternatively, the initial dose could be estimated by the amount of insulin required from a 24-h intravenous insulin infusion. This, however, may not be an accurate assessment of actual subcutaneous insulin needs. The major concern about using insulin glargine or ultralente insulin for this population is that when the enteral feeding is discontinued, whether planned or not, the subcutaneous insulin depot



will result in a high risk of hypoglycemia, particularly if large doses of insulin are required. The use of NPH or regular insulin for this situation is also problematic since the peaks and troughs of insulin do not match the insulin requirements necessitated by the carbohydrate infusion. Although there is no ideal way to manage this problem, the safest appears to maintain target blood glucose at the high end of the target range using basal insulins. When the tube feeding is discontinued, either enteral or parenteral glucose must be infused until the subcutaneous insulin has dissipated.

### **HOW CAN SYSTEM DESIGN AND IMPLEMENTATION IMPROVE DIABETES CARE IN THE HOSPITAL?**

— The design and implementation of protocols for maintaining glucose control in the hospital may provide useful guidance to the treating physician. Diabetes management may be offered effectively by primary care physicians or hospitalists, but involvement of appropriately trained specialists or specialty teams may reduce length of stay, improve glycemic control, and improve outcomes (314,379–381). For a variety of conditions, outcomes under standardized pathways or dose titration protocols are superior to those achieved by individualization of care (382). In evaluation of institutional performance, variability of treatment strategies among providers may itself be interpreted as a risk factor for unsafe practices, and “standardization to excellence” may be interpreted as a surrogate for patient safety (322,383). In the care of diabetes, implementation of standardized order sets for scheduled and correction-dose insulin may reduce reliance on sliding scale management (307). A team approach is needed to establish hospital pathways. To implement intravenous infusion of insulin for the majority of patients having prolonged NPO status, hospitals will need multidisciplinary support for using insulin infusion therapy outside of critical care units.

Patient safety, quality of care, variability of practice, and medical error have been the subjects of increasing national concern (384–390). Quality assessment programs that strive to promote a “culture of safety” commonly focus on diabetes. It has been reported that 11% of medication errors result from insulin misadministra-

tion (391), and insulin has been identified as one of several medications that deserve high alert status (392,393). Hypoglycemia may result from drug-dispensing errors, including mistaken administration of hypoglycemic agents to nondiabetic patients. For diabetic patients, frank prescribing errors, the use of trailing zeros after decimal points, or misinterpreted abbreviations for insulin may compromise patient safety (394–397). Because capital “U” can be mistaken for a numeral when handwritten, the word “units” should be spelled out in physician orders (391,398). The erroneous administration of a large dose of rapid-acting insulin in place of insulin glargine can easily occur, since insulin glargine and rapid-acting insulins look the same in the vial (both are clear). Barcoding of drugs and pharmacist participation in rounds and in surveillance of prescribing patterns may help reduce errors (399–404). Although some emphasis has been placed on institutional standardization of sliding scales (382,405), sliding scale monotherapy itself has been considered to be both ineffective compared with anticipatory management and frequently dangerous. A computerized order entry system can reduce utilization of sliding scale management (406). With present-day monitoring techniques, the inhouse development of ketoacidosis or hyperglycemic hyperosmolar state is generally preventable, and any occurrence should suggest the need for a root cause analysis (407–415). By tracking transfers or readmissions to the intensive care unit, it is sometimes possible to detect an opportunity for improvement, such as a recurrent pattern of failure to administer scheduled subcutaneous insulin at the termination of insulin infusion leading to development of metabolic emergency.

Both hypoglycemia and hyperglycemia are patient safety issues appropriate for continuous quality improvement (CQI) analysis. Nevertheless, as a focus for institutional CQI activities, hypoglycemia receives more attention, and hypoglycemic events are more readily defined and ascertained. Pharmacies can readily track for example the dispensing of D50 as an “antidote,” administered by nursing staff without physician orders, or detect hypoglycemia through analysis of reports of adverse drug reactions (416). In contrast, although computer searches of the laboratory databank may be used to help

identify instances of hyperglycemia, at many institutions point-of-care measurements will escape detection unless values are scanned into an electronic databank (417). Severe hyperglycemia (at least one glucose level >400–450 mg/dl), prolonged hyperglycemia (at least three consecutive glucose levels >250 mg/dl), and ketosis all can be used as quality-control indicators. The time from presentation to the emergency room with hyperglycemic emergency to the initiation of an insulin infusion may be viewed as a quality issue (268). The use of a balanced emphasis on both hypoglycemia and hyperglycemia by hospital quality-improvement programs has been linked to changes in practice patterns that result in improved control (418–420).

### **WHAT IS THE ROLE OF DIABETES SELF-MANAGEMENT EDUCATION FOR THE HOSPITALIZED PATIENT?**

— Teaching diabetes self-management to patients in hospitals is a difficult and challenging task. Patients are hospitalized because they are ill, are under increased stress related to their hospitalization and diagnosis, and are in an environment that is not conducive to learning. In addition, patients are often unable to get the optimal amount of rest because of various distractions, such as the telephone, TV, personnel, meal times, testing, and procedures. The shock of diagnosis, denial, anger, grief, and many emotions frequently prevent or impair the person’s ability to meaningfully participate in the educational process. Ideally, people with diabetes should be taught at a time and place conducive to learning: as an outpatient in a nationally recognized program of diabetes education classes.

For the hospitalized patient, diabetes “survival skills” education is generally considered a feasible approach. Patients are taught sufficient information to enable them to go home safely. Those newly diagnosed with diabetes or who are new to insulin and or blood glucose monitoring need to be instructed before discharge to help ensure safe care upon returning home. Those patients hospitalized because of a crisis related to diabetes management or poor care at home need education to hopefully prevent subsequent episodes of hospitalization. Goals of inpatient diabetes self-management education (DSME) are listed in Table 7.



**Table 7—Goals of inpatient DSME**

- Assess current knowledge and practices of diabetes self-management and how they impact patient's health status and reason for hospitalization
- Initiate diabetes education for patients newly diagnosed with diabetes
- Provide information on basic self-management skills to help ensure safe care postdischarge
- Team approach with other health professionals (e.g., physicians, nurses, dietitians, case managers, and social workers) coordinating care in the hospital and post discharge
- Provide information on community resources and diabetes education programs for continuing education
- The diabetes educator serves as a resource for nursing staff and other health care providers

The efficacy of hospital-based DSME on outcomes has not been tested in randomized prospective studies. Performing such a study that denies the basics of DSME to a control group is considered unethical (421). Given the limitations and ethics of study design, several studies suggest hospital-based DSME has substantial benefits in outcomes. Using historical controls, Muhlhauser et al. (422) reported a 66% reduction in hospitalization days and an 86% reduction in episodes of diabetic ketoacidosis after implementing an intensive inpatient-based education program for patients with type 1 diabetes. Four deaths occurred in the control group, compared with no deaths in the treatment group. All deaths were from acute diabetes-related complications.

Fedderson and Lockwood (423) conducted a prospective nonrandomized study at a single 713-bed teaching hospital. Within the hospital, four similar patient care units (PCUs) were identified for the study intervention. Two units were designated as the treatment units and two as the control units. For the control units, DSME was provided by the regular nursing staff. For the experimental units, a certified diabetes educator (CDE) was employed to provide education to both the staff nurses and directly to diabetic patients. The nurse CDE conducted three separate teaching sessions for the staff nurses in the experimental PCUs on information that an insulin-requiring patient with diabetes needs before discharge. The nurse CDE also provided direct patient education. The authors reported a mean reduction in hospital length of stay of 1.3 days in the experimental group versus the control group ( $P < 0.005$ ).

Wood (424) compared the efficacy of individualized DSME (control group) to individualized DSME supplemented by 2-h group classes held weekly (experimental group). Patients medically unstable were excluded from the study. Based

on a follow-up questionnaire, the experimental group reported better adherence for all self-care behaviors than the control group. Four months postdischarge, the experimental group had significantly fewer emergency room visits compared with the control group (2 vs. 20 visits, respectively,  $P = 0.005$ ).

### Writing DSME consult requests

When writing a request for consultation for diabetes education, the referral should state the specific reason for the referral (not just state "Diabetes Education"), any pertinent details regarding the patient status, the discharge plan and person referring for consult, and how to contact them (Table 8). Early referral is encouraged, especially for those patients newly diagnosed with diabetes. Patients should be medically stable and able to participate in the educational process. Patients who are in pain or sedated should not be referred for DSME until their medical condition improves. Including various disciplines in the plan of care is equally important. If caregivers are involved, it is important that they be identified and included in the teaching process. Patients who are cognitively impaired are not good candidates for teaching and should have alternative options of care considered. Topics to be covered should be relevant to the plan of care and ready to implement at the time of discharge.

It is best to maximize the time spent

on topics immediately relevant to the patient's diabetes management. Registered dietitians should be consulted for medical nutritional therapy and patient teaching. Social workers and case managers should be involved with discharge planning and orders for home-health-nurse follow up upon discharge. Those likely in need of home health nursing referrals include newly diagnosed diabetic patients, patients new to insulin, the aged or infirm, and those for whom there are compliance concerns.

### Patient assessment

Patient assessment assists with defining the patient's problems and acknowledging his or her concerns. When seeing an inpatient for an initial consultation, it is imperative to be able to focus on the greatest needs of the patient at that time. Knowing the reason for the consultation allows the educator to direct precious time and energy to those specific educational needs and to bring any necessary teaching materials/supplies to the bedside. Before actually seeing the patient, the diabetes educator should review the chart and, if necessary, speak with the referring physician or registered nurse who is caring for the patient in order to obtain additional information. Assessment critical to patient teaching includes:

- Knowledge, psychomotor skills, and affective domains
- Current level of self care
- Preferred learning styles
- Psychological status
- Stress factors that impair learning
- Social/cultural/religious beliefs
- Literacy skills
- Readiness to learn
- Assessment of abilities—age, mobility, visual acuity, hearing loss, and dexterity

**Table 8—Writing the DSME consult request**

| Component of request                      | Example                                                                                           |
|-------------------------------------------|---------------------------------------------------------------------------------------------------|
| Specific reason for consult and diagnosis | Diabetes education for insulin administration teaching for patient with new-onset type 2 diabetes |
| Discharge medication plan                 | Lantus 30 units hs, Novolog 6 units ac                                                            |
| Specific comments/instructions            | Spanish-speaking patient; lives with daughter                                                     |
| Contact information                       | John Smith, MD, pager #                                                                           |

ac, before meals; hs, bedtime.

### Characteristics of adult learners

In preparing to teach, it is good to keep in mind some of the characteristics of adult learners:

- Usually self-directed
- Must be receptive to learning
- Tend to be problem-focused rather than subject-oriented
- Inclusive of past experiences with diabetes
- Active participation

### Deciding what to teach patients

Deciding what to teach patients in a limited timespan is determined mostly by medical necessity but also by the patient's previous experiences and desires. The patient must be psychologically and emotionally ready for teaching. Listening to concerns and acknowledging the patient's feelings without being judgmental is an important aspect of changing behavior. When patients are newly diagnosed with diabetes, teaching "survival skills" is the first step to outlining the principles of diabetes management. These may include:

- What is diabetes? Principles of treatment and prevention of complications
- Norms for blood glucose and target glucose levels for the individual
- Recognition, treatment, and prevention of hyperglycemia and hypoglycemia
- Medical nutrition therapy (instructed by a registered dietitian who, preferably, is a CDE)
- Medication
- Self-monitoring of blood glucose
- Insulin administration (if going home on insulin)
- Sick-day management
- Community resources
- Universal precautions for caregivers

Patients previously diagnosed with diabetes need to have specific needs identified, and their instruction must be targeted to those needs. Diabetes education in a hospital setting is not meant to provide comprehensive in-depth knowledge of diabetes management, but is intended to provide basic information for people to start a life-long process of continuing diabetes education.

### Communication and discharge planning

Documentation, reviewing chart notes/suggestions, and oral communication are

vital to coordinating care with successful outcomes for hospitalized patients with diabetes. Staff nurses need to work with patients on developing their skills and reinforcing knowledge of diabetes management. Medical orders and the discharge plan of care need to be appropriate, achievable, and agreeable to the patient and family. For effective discharge planning, collaboration among the treating physician, nurses, and the diabetes nurse educator is essential for providing continuity of care back to the outpatient setting. During discharge planning, the following questions should be addressed:

- Does the patient require outpatient DSME?
- Can the patient prepare his or her own meals?
- Can the patient perform self-monitoring of blood glucose at the prescribed frequency?
- Can the patient take his or her diabetes medications or insulin accurately?
- Is there a family member who can assist with tasks that the patient cannot perform?
- Is a visiting nurse needed to facilitate transition to the home?

### Discharge diabetes medications

When arranging for hospital discharge, caution should be taken in prescribing antihyperglycemic therapy, especially for the elderly. A recent hospital discharge is a strong predictor of subsequent serious outpatient hypoglycemia (425). This observation should lead to caution in the planning of antihyperglycemic therapy at discharge and careful planning for follow-up. Prescribing patterns should take into consideration the evidence that among the sulfonylureas, glipizide is associated with less hypoglycemia than glyburide in the elderly (426).

### WHAT IS THE ROLE OF MEDICAL NUTRITION THERAPY IN THE HOSPITALIZED PATIENT WITH DIABETES? —

Determining the nutritional needs of hospitalized patients with diabetes, writing a diet order to provide for those needs, and incorporating the current nutrition principles and recommendations for persons with diabetes can be a daunting task. Even though hospital diets are commonly ordered by calorie levels based on the "ADA diet," it

has been recommended that the term "ADA diet" no longer be used (427). Since 1994, the ADA has not endorsed any single meal plan or specified percentages of macronutrients. Current nutrition recommendations advise individualization based on treatment goals, physiologic parameters, and medication usage; these recommendations apply primarily to persons living in a home setting who, in conjunction with a team of health professionals, self-manage their diabetes.

The question is, then, how do you use medical nutrition therapy appropriately in the hospital? Nutrient needs often differ in the home versus the hospital setting. The diabetes treatment plan used in the hospital may differ from home, e.g., insulin may be used instead of oral medications. The types of food a person can eat may change, or the route of administration may differ, e.g., enteral or parenteral feedings may be used instead of solid foods. And lastly, the ability of institutions to individualize meal plans is greatly decreased. Because of the complexity of nutrition issues, it is recommended that a registered dietitian, knowledgeable and skilled in medical nutrition therapy, serve as the team member who provides medical nutrition therapy. The dietitian is responsible for integrating information about the patient's clinical condition, eating, and lifestyle habits and for establishing treatment goals in order to determine a realistic plan for nutrition therapy (428). Registered dietitians who specialize in nutrition support can play an invaluable role in the management of critically ill patients. However, it is essential that all members of the interdisciplinary team are knowledgeable of nutrition therapy.

### Goals of medical nutrition therapy

For the hospitalized patient, the goals of nutrition therapy are multiple:

- Attain and maintain optimal metabolic control of blood glucose levels, lipid levels, and blood pressure to enhance recovery from illness and disease
- Incorporate nutrition therapies to treat the complications of diabetes, including hypertension, CVD, dyslipidemia, and nephropathy
- Provide adequate calories, as needs are often increased in illness and during recovery from surgery

- Improve health through use of nutritious foods
- Address individual needs based on personal, cultural, religious, and ethnic food preferences
- Provide a plan for continuing self-management education and follow-up care

### **Nutritional needs of hospitalized patients**

The caloric needs of most hospitalized patients can be met through provision of 25–35 kcal/kg body wt (429,430). Protein needs vary on the basis of physiologic stress. Mildly stressed patients require 1.0 g/kg body wt; moderately to severely stressed patients may need 1.5 g/kg body wt. These levels are for patients with normal hepatic and renal function. The preferred route of feeding is the oral route. If intake is inadequate or if medical conditions prohibit oral feeding, then enteral or parenteral feedings will be needed.

### **Consistent carbohydrate diabetes meal-planning system**

The consistent carbohydrate diabetes meal-planning system was developed to provide institutions with an up-to-date way of providing food service to patients in those settings. The system is not based on specific calorie levels, but rather on the amount of carbohydrate offered at each meal. This amount is consistent from meal to meal and day to day. Meals are based on heart-healthy diet principles—saturated fats and cholesterol are limited, and protein content falls within a usual diet's content of 15–20% of calories. Instead of focusing on the type of carbohydrate foods served, the emphasis is on the total amount of carbohydrate contained in the meal. The majority of carbohydrate foods should be whole grains, fruits, vegetables, and low-fat milk, but some sucrose-containing foods can be included as part of the total carbohydrate allowance (430). A typical day's menu provides ~1,500–2,000 calories, with a range of 12–15 carbohydrate servings (187–259 g) divided among meals and snacks.

Central to the rationale for this system is that the glycemic effect of carbohydrate relates more to the total amount of carbohydrate rather than the source. While a number of factors influence glycemic response to individual foods, ingestion of a variety of foods does not acutely alter glycemic response if the amount of carbohydrate

is similar (430). Sucrose does not increase glycemia to a greater extent than isocaloric amounts of starch. The prandial (mealtime) insulin dose is based on the meal's carbohydrate content. Current recommendations for fat modification (430) are incorporated by basing the meals on a cardiac, heart-healthy menu when devising the consistent carbohydrate meal plan.

An advantage to the use of this system is that prandial insulin dosages can be ordered on the basis of the known carbohydrate content of the meal. For patients with a poor appetite and poor intake, the prandial insulin can be given after the meal based on the amount eaten. Using a consistent carbohydrate menu makes this easy to determine. Providing meals with this system eases the burden on the health care team of trying to individualize diets, especially when it is not practical, such as during a short hospital stay. Meals for patients with type 1 diabetes can easily be adjusted by altering the number of carbohydrate servings and snacks (428). Efficiencies in food service are realized and patient satisfaction is enhanced with this system (428,431). Another advantage is that the system reinforces carbohydrate counting meal planning taught to many persons with diabetes, particularly type 1 diabetic individuals using advanced carbohydrate counting. It serves as a basis for teaching newly diagnosed patients with diabetes about meal planning and can serve as a reference for home meals.

The meals served to patients with diabetes certainly affect glucose control, but it should be remembered it is not the only factor influencing glycemia. Hospitalized patients often have poor appetites and intake is suboptimal. Meals can be delayed or missed entirely due to tests and procedures. Other causes of poor glucose control include erratic absorption of insulin, counterregulatory hormone stress responses, increased insulin requirements, the length of time between premeal insulin and food consumption, and impaired gut motility caused by diabetic gastroparesis and medications, particularly narcotics (300).

### **How to order consistent carbohydrate diets**

There is no single meal-planning system that meets the needs of all institutions. Budgetary issues, food-service employee time, local factors, and administration un-

derstanding and support affect the choice of a meal planning system (432). Many institutions are familiar with exchange diets and, therefore, some facilities still use them as a system for planning meals. Introduction of the consistent carbohydrate system requires a multidisciplinary effort, staff education, and patient education for the program to succeed, but it can offer clear benefits when implemented. Institutions can adapt the consistent carbohydrate system to meet their needs. A review of the implementation of the consistent carbohydrate system in institutions revealed some variations developed by various facilities (431), as described below.

One hospital terms the diet the “consistent carbohydrate diabetes diet.” Calorie levels are not specified. Menus with food selections instruct patients to choose three to five carbohydrate foods at each meal, identifying the carbohydrate foods. Each contains 15 g carbohydrate. Dessert items with 30 g carbohydrate (two carbohydrate choices) or 15 g are included at lunch and dinner. Another facility uses the consistent carbohydrate menu with calorie ranges from low to very high. All carbohydrate-containing foods are grouped in one list on the menu. Other modifications of nutrients or textures can be added. Since no universal guideline exists for consistent carbohydrate diabetes diet ordering, it is encouraged that hospital nutrition committees specify their own ordering guidelines that meet the unique needs of their patients and capabilities of their nutrition staff.

Regardless of the type of meal planning system selected, the use of meal plans such as no concentrated sweets, no sugar added, low sugar, and liberal diabetic diets are no longer appropriate. These diets unnecessarily restrict sucrose and do not reflect the current evidence-based nutrition recommendations (433).

### **Special nutrition issues**

**Liquid diets.** Sugar-free liquid diets are not appropriate for patients with diabetes. Calories and carbohydrates are needed to provide for normal physiologic processes. Patients given clear or full liquid diets should receive ~200 g carbohydrate, spread equally throughout the day in meals and snacks (428).

**Surgery and progression diets.** After surgery it is desirable to initiate feeding as soon as possible in order to protect intestinal integrity (428). Advancement from





Table 9—Conditions causing erroneous bedside blood glucose results

| Sources of analytical error                                                               | Sources of user error                                                                                  |
|-------------------------------------------------------------------------------------------|--------------------------------------------------------------------------------------------------------|
| Low hematocrit*                                                                           | Inadequate meter calibration                                                                           |
| High hematocrit†                                                                          | Using a test strip that does not match the meter code or that has passed the expiration date           |
| Shock and dehydration‡                                                                    | Inadequate quality-control testing                                                                     |
| Hypoxia‡                                                                                  | Poor meter maintenance                                                                                 |
| Hyperbilirubinemia, severe lipemia*                                                       | Poor technique in performing fingerprick                                                               |
| Specimen additives: sodium fluoride‡                                                      | Poor technique of applying drop of blood to the test strip                                             |
| Drugs—acetaminophen overdose, ascorbic acid, dopamine, fluorescein, mannitol, salicylate‡ | Failure to record results in patient's chart or to take action if blood glucose is out of target range |

\*Falsely elevates result; †falsely lowers result; ‡can either falsely lower or elevate result, depending on the device used.

glucose analyzer at 1- to 4-h intervals. The use of alternate-site glucose testing (i.e., arm, leg, or palm) in the hospital has not been studied. The use of alternate-site glucose testing may cause erroneous results when the blood glucose level is rapidly rising or falling and when hypoglycemia occurs (442).

As with any procedure handling blood, protective glove use is essential for health care personnel performing bedside glucose monitoring. The use of self-retracting lancet devices has the potential to eliminate the chance of needlestick injury and risk for infection. Table 10 outlines specific elements of a quality-control program deemed to be necessary for appropriate use of bedside blood glucose testing in the hospital (443). Key participants in the program are clinical laboratory representatives, nurses, physicians, and hospital administrators. Additional guidelines are published by the National Committee for Clinical Laboratory Standards (444). For patients practicing diabetes self-management in the hospital, a quality-control program to test the patient's blood glucose device and the patient's testing technique is necessary to ensure accurate results.

### IS IMPROVED DIABETES CARE IN HOSPITALS COST EFFECTIVE?

Of the \$91.8 billion spent annually in the U.S. for direct medical expenditures for diabetes, hospital care accounts for the single largest component of expenditures, comprising \$40 billion, or 43.9%, of the total cost (445). After adjustment for age, sex, and race/ethnicity, annual per capita costs for hospital care is \$6,309 for persons with diabetes versus \$2,971 for persons with-

out diabetes—a cost ratio of 2.1. Similar increased hospital-related cost for diabetic patients is reported in Europe (446). This increased cost for hospital care is due to increased frequency of hospital admissions (447), increased length of stay, and increased cost per hospital day due to higher utilization of intensive care and procedures (448).

Furnary and colleagues (196,290) performed a cost-effectiveness analysis following implementation of a continuous intravenous insulin infusion program for the first 3 days after cardiac surgical procedures in diabetic patients. Compared with historical control subjects, the incidence of deep sternal wound infections (DSWIs) was reduced from 1.9 to 0.8%, and mortality from DSWIs reduced decreased from 19 to 3.8% after implementation of the protocol. The average excess length of stay from DSWI was 16 days, generating an average \$26,400 in additional hospital charges. Furnary et al. (449) estimated the additional expense of insulin infusion at \$125–150 per patient. Of 1,499 patients in the intervention group, the number of DSWIs prevented was 10, resulting in an average cost to prevent one DSWI at approximately \$21,000. This estimate does not incorporate the potential effects of the intervention on other outcomes, such as a reduction in mortality, cost for chronic care, and lost income from work.

Van den Bergh et al. (2) reported a 34% reduction in hospital mortality in critically ill patients treated with intensive insulin therapy. Intensive insulin therapy reduced the duration of intensive care but not the overall length of stay in the hospital. Subsequent comparison of costs between the groups for rehabilitation,

chronic care, home care, or loss of wages due to illness or mortality has not as yet been reported.

Levetan et al. (379) reported the impact of obtaining an endocrinology consultation, either alone or as part of multidisciplinary diabetes team (endocrinologist, diabetes nurse educator, and a registered dietitian), on hospital length of stay in patients admitted with the principal diagnosis of diabetes, including hyperosmolar state, diabetic ketoacidosis, and uncontrolled diabetes. In this non-randomized observational study, the average length of stay of the diabetes team patients was  $3.6 \pm 1.7$  days as compared with  $8.2 \pm 6.2$  days for patients in the no-consultation group and  $5.5 \pm 3.4$  days for the patients who received a traditional individual endocrine consultation. Possible reasons for shortened length of stay were more rapid normalization of glucose levels, more efficient transition from intravenous to subcutaneous insulin, faster transition to a definitive insulin or oral medication regimen, and more effective teaching of diabetes survival skills. Estimated cost savings from reduction in length of stay for the 34 patients seen by the diabetes team was \$120,000 compared with the cost in salaries of \$40,000.

In summary, the potential opportunity for cost savings from improved hospital outcomes, reduced mortality, and shortened length of stay for patients with diabetes and hospital-related hyperglycemia is substantial. Future studies using randomized prospective design are needed to verify these results.

### SUGGESTIONS FOR FUTURE RESEARCH

While outcomes studies that provide evidence for a clear role

Table 10—Characteristics of an effective bedside glucose monitoring (BGM) quality-control program

| Characteristic                                                                                                                                                                                                                                                                                                                                                                                                                                                                                                                                                                                                                                                                                                                                                                                                                                                                                                                                                                                                                                                                                                                                                                                                                                                                                                                                                                                                                                                                                              |
|-------------------------------------------------------------------------------------------------------------------------------------------------------------------------------------------------------------------------------------------------------------------------------------------------------------------------------------------------------------------------------------------------------------------------------------------------------------------------------------------------------------------------------------------------------------------------------------------------------------------------------------------------------------------------------------------------------------------------------------------------------------------------------------------------------------------------------------------------------------------------------------------------------------------------------------------------------------------------------------------------------------------------------------------------------------------------------------------------------------------------------------------------------------------------------------------------------------------------------------------------------------------------------------------------------------------------------------------------------------------------------------------------------------------------------------------------------------------------------------------------------------|
| <ul style="list-style-type: none"> <li>• A specifically designated responsible individual, preferably a laboratory professional, is involved in the administration and quality assurance of the BGM program.</li> <li>• A written procedure for the BGM program.</li> <li>• An organized training program that involves laboratory personnel and nursing staff.</li> <li>• Defined frequencies and requirements for maintenance and cleaning of BGM instruments.</li> <li>• Regular performance of quality control testing on each instrument (daily or by shift), depending on the frequency of patient testing.</li> <li>• A policy to regularly compare the BGM results from each operator and instrument with results from a corresponding sample tested in the clinical laboratory. Suggest that all BGM results are, at least, within <math>\pm 15\%</math> variation from the clinical laboratory results.</li> <li>• Participation in an external proficiency testing program.</li> <li>• Acknowledgment of the limitations of BGM and requirement of a clinical laboratory glucose determination when a BGM result is outside a defined range.</li> <li>• Acknowledgment of the effect of hematocrit value variation on BGM results and establishment of hematocrit value limitations for the instrument in use.</li> <li>• Determination of the bias of the instrument in use and communication of this information to the physicians and the institutional quality assurance program.</li> </ul> |

Adapted from Jones et al. (443).

for targeted glucose control in the hospital management of diabetes are beginning to accumulate in the scientific literature, numerous questions related to how to best manage diabetes in this hospital setting remain to be addressed. These questions may be grouped into three main areas: health care outcomes attributable to glycemic control, specific strategies for insulin delivery, and processes for optimizing diabetes care and education in the hospital setting.

Table 11—Summary of major recommendations for hospital management of hyperglycemia

| Recommendation                                                                                                                                                                                                                                                                                                                                                                                                                                                                                                                                                                                                                                                                                                                                                                                                                                                                                                                                                                                                                                                                                                                                                                                                                                                                                                                                                                                                                                                                                                                                                                                                                                                                                                                                                                                                                                                                                                                                                                                                                                                                                                                                                                                                                                                            | Level of evidence                                                                                  |
|---------------------------------------------------------------------------------------------------------------------------------------------------------------------------------------------------------------------------------------------------------------------------------------------------------------------------------------------------------------------------------------------------------------------------------------------------------------------------------------------------------------------------------------------------------------------------------------------------------------------------------------------------------------------------------------------------------------------------------------------------------------------------------------------------------------------------------------------------------------------------------------------------------------------------------------------------------------------------------------------------------------------------------------------------------------------------------------------------------------------------------------------------------------------------------------------------------------------------------------------------------------------------------------------------------------------------------------------------------------------------------------------------------------------------------------------------------------------------------------------------------------------------------------------------------------------------------------------------------------------------------------------------------------------------------------------------------------------------------------------------------------------------------------------------------------------------------------------------------------------------------------------------------------------------------------------------------------------------------------------------------------------------------------------------------------------------------------------------------------------------------------------------------------------------------------------------------------------------------------------------------------------------|----------------------------------------------------------------------------------------------------|
| <ul style="list-style-type: none"> <li>• Good metabolic control is associated with improved hospital outcomes. Target plasma glucose levels are: <ul style="list-style-type: none"> <li>• <math>&lt;110</math> mg/dl preprandial and <math>&lt;180</math> mg/dl peak postprandial.</li> </ul> </li> <li>• Intensive insulin therapy with intravenous insulin, with the goal of maintaining blood glucose 80–110 mg/dl, reduces morbidity and mortality among critically ill patients in the surgical ICU.</li> <li>• Intravenous insulin infusion is safe and effective for achieving metabolic control during major surgery, hemodynamic instability, and NPO status.</li> <li>• Intravenous insulin infusion is safe and effective for patients who have poorly controlled diabetes and widely fluctuating blood glucose levels or who are insulin deficient or severely insulin resistant.</li> <li>• Intravenous insulin infusion, followed by multidose subcutaneous insulin therapy, improves survival in diabetic patients after myocardial infarction.</li> <li>• For insulin-deficient patients, despite reductions or the absence of caloric intake, basal insulin must be provided to prevent diabetic ketoacidosis.</li> <li>• Use of scheduled insulin improves blood glucose control compared with orders based on sliding scale insulin coverage alone.</li> <li>• For patients who are alert and demonstrate accurate insulin self-administration and glucose monitoring, insulin self-management should be allowed as an adjunct to standard nurse-delivered diabetes management.</li> <li>• Patients with no prior history of diabetes who are found to have hyperglycemia (random blood glucose <math>&gt;125</math> mg/dl or 6.9 mmol/l) during hospitalization should have follow-up testing for diabetes within 1 month of hospital discharge.</li> <li>• Establishing a multidisciplinary team that sets and implements institutional guidelines, protocols, and standardized order sets for the hospital results in reduced hypoglycemic and hyperglycemic events.</li> <li>• Diabetes education, medical nutrition therapy, and timely diabetes-specific discharge planning are essential components of hospital-based diabetes care.</li> </ul> | <p>B</p> <p>A</p> <p>B</p> <p>B</p> <p>A</p> <p>B</p> <p>B</p> <p>E</p> <p>E</p> <p>B</p> <p>C</p> |

### Health care outcomes related to glycemic control

Few studies in the literature contain randomized, controlled evidence to support specific interventions that target glucose control in various clinical settings. Work is clearly needed to provide rigorous evidence in the hospital management of diabetes in order to:

- Further define the role of targeted glucose control and the threshold for impact of blood glucose level on health care outcomes in diverse clinical settings, such as general medicine and surgery patients, and in specific circumstances, such as stroke, neurosurgery, and CVDs
- Examine clinical outcomes
- Examine health care economic outcomes such as length of stay and cost effectiveness
- Further examine the impact of specialist care and diabetes team management

- Define the impact of diabetes education.

### Specific strategies for insulin delivery

Development and implementation of specific strategies for insulin delivery, based on knowledge of the pharmacokinetics of the currently available insulins, will allow physicians and nurses to overcome barriers to its effective use in managing blood glucose. Such strategies will need to demonstrate safety and efficacy of specific applications of insulin therapies that address known areas of need, including:

- Optimum methods for delivering basal insulin under various clinical conditions
- Feasibility of using subcutaneous glargine or detemir insulin to meet basal insulin requirements (e.g., for medicine services) in the operating

room and for periprocedural management

- The role of standardization of diabetes management and algorithmic care and validation of such pathways and tools
- Safety and practicality of delivering insulin infusion therapy outside the intensive care unit
- Simple algorithms for subcutaneous delivery of programmed basal, prandial/nutritional, and correction doses of insulin and insulin infusion algorithms.

### Improved methods for glucose monitoring

Current methods for blood glucose monitoring are painful and time consuming. Improved methods for frequent and accurate blood glucose monitoring would enhance the ability to reach target blood glucose levels safely. Development of continuous glucose monitoring systems that are safe and accurate is encouraged.

### Processes for optimizing diabetes care and education in the hospital setting

Because diabetes is seen in a broad spectrum of inpatients, processes need to be defined and tested to enable safe and effective patient management and optimization of outcomes. Areas of interest include:

- Strategies adopted by institutions to reduce errors, enhance safety, and improve quality of care
- Development and implementation of nursing policies effective for hypoglycemia prevention
- Impact of institutional hypoglycemia programs on willingness of physicians to prescribe insulin to adequately control hyperglycemia
- Whether correlation exists between institutional adherence to clinical pathways and algorithms and outcomes
- Most appropriate CQI measures for evaluation of performance in achieving glycemic control
- Most appropriate focus for regulatory organizations such as JCAHO.

**CONCLUSIONS**—Hyperglycemia is associated with poor hospital outcomes. The key question for guiding therapy is whether hyperglycemia observed in the hospital is a simple marker for the underlying disease state (i.e., diabetes) or

the severity of illness or if hyperglycemia itself, in conjunction with relative hypoinsulinemia, is pathogenic for tissue injury and poor hospital outcomes. Based on limited interventional studies in selected settings, aggressive control of blood glucose in the hospital may provide an opportunity to improve patient outcomes. Clinical trials are needed to answer these questions. The target blood glucose threshold to optimize outcomes in the hospital is not clearly defined but may be lower than previously thought. From a cost perspective, research and strategies targeting glucose control and diabetes care in the hospital have the potential to translate to substantial cost savings.

**Acknowledgments**—Support for this Technical Review was provided by an unrestricted educational grant from Novo Nordisk.

The authors thank the members of the ADA Professional Practice Committee for their thoughtful review of the manuscript. The authors also thank Drs. James Lenhard and Stephen Hodak for their helpful comments.

### References

1. Umpierrez GE, Isaacs SD, Bazargan N, You X, Thaler LM, Kitabchi AE: Hyperglycemia: an independent marker of in-hospital mortality in patients with undiagnosed diabetes. *J Clin Endocrinol Metab* 87:978–982, 2002
2. Van den Berghe G, Wouters P, Weekers F, Verwaest C, Bruyninckx F, Schetz M, Vlasselaers D, Ferdinande P, Lauwers P, Bouillon R: Intensive insulin therapy in critically ill patients. *N Engl J Med* 345:1359–1367, 2001
3. The Expert Committee on the Diagnosis and Classification of Diabetes Mellitus: Report of the Expert Committee on the Diagnosis and Classification of Diabetes Mellitus. *Diabetes Care* 26 (Suppl. 1):S5–S20, 2003
4. Tierney E: Data from the National Hospital Discharge Survey Database 2000, Center of Disease Control and Prevention, Division of Diabetes Translation, Atlanta, GA, 2003. Personal communication
5. Jencks SF: Accuracy in recorded diagnoses. *JAMA* 267:2238–2239, 1992
6. Levitan CS, Passaro M, Jablonski K, Kass M, Ratner RE: Unrecognized diabetes among hospitalized patients. *Diabetes Care* 21:246–249, 1998
7. Norhammar A, Tenerz A, Nilsson G, Hamsten A, Efendic S, Ryden L, Malmberg K: Glucose metabolism in patients with acute myocardial infarction and no previous diagnosis of diabetes mellitus: a prospective study. *Lancet* 359:2140–2144, 2002
8. Greci LS, Kailasam M, Malkani S, Katz DL, Hulinisky I, Ahmadi R, Nawaz H: Utility of HbA<sub>1c</sub> levels for diabetes case finding in hospitalized patients with hyperglycemia. *Diabetes Care* 26:1064–1068, 2003
9. Aubert R, Geiss L, Ballard D, Coughnour B, Herman W: *Diabetes-Related Hospitalization and Hospital Utilization*. 2nd ed. Bethesda, MD, National Institutes of Health, 1995, p. 555–556
10. Joshi N, Caputo G, Weitekamp M, Karchmer A: Infections in patients with diabetes mellitus. *N Engl J Med* 341:1906–1912, 1999
11. Wheat L: Infection and diabetes mellitus. *Diabetes Care* 3:187–197, 1980
12. Mowat A, Baum J: Chemotaxis of polymorphonuclear leukocytes from patients with diabetes mellitus. *N Engl J Med* 284:621–627, 1971
13. Bagdade J, Root R, Bulger R: Impaired leukocyte function in patients with poorly controlled diabetes. *Diabetes* 23:9–15, 1974
14. Bagdade JD, Stewart M, Walters E: Impaired granulocyte adherence. A reversible defect in host defense in patients with poorly controlled diabetes. *Diabetes* 27:677–681, 1978
15. van Oss CJ, Border JR: Influence of intermittent hyperglycemic glucose levels on the phagocytosis of microorganisms by human granulocytes in vitro. *Immunol Commun* 7:669–676, 1978
16. Davidson N, Sowden J, Fletcher J: Defective phagocytosis in insulin-controlled diabetics: evidence for a reaction between glucose and opsonizing proteins. *J Clin Pathol* 37:783–786, 1984
17. Alexiewicz J, Kumar D, Smogorzewski M, Klin M, Massry S: Polymorphonuclear leukocytes in non-insulin-dependent diabetes mellitus: abnormalities in metabolism and function. *Ann Intern Med* 123:919–924, 1995
18. Leibovici L, Yehezkeli Y, Porter A, Regev A, Krauze I, Harrell D: Influence of diabetes mellitus and glycemic control on the characteristics and outcome of common infections. *Diabet Med* 13:457–463, 1996
19. Kwoun M, Ling P, Lydon E, Imrich A, Qu Z, Palombo J, Bistran B: Immunologic effects of acute hyperglycemia in nondiabetic rats. *J Parenter Enteral Nutr* 21:91–95, 1997
20. McManus L, Bloodworth R, Prihoda T, Blodgett J, Pinckard R: Agonist-dependent failure of neutrophil function in diabetes correlates with extent of hyperglycemia. *J Leukocyte Biol* 70:395–404,



- 2001
21. MacRury S, Gemmell C, Paterson K, MacCush A: Changes in phagocytic function with glycaemic control in diabetic patients. *J Clin Pathol* 42:1143–1147, 1989
22. Rassias A, Marrin C, Arruda J, Whalen P, Beach M, Yeager M: Insulin infusion improved neutrophil function in diabetic cardiac surgery patients. *Anesth Analg* 88:1011–1016, 1999
23. Rassias A, Givan A, Marrin C, Whalen K, Pahl J, Yeager M: Insulin increases neutrophil count and phagocytic capacity after cardiac surgery. *Anesth Analg* 94:1113–1119, 2002
24. Repine J, Clawson C, Goetz F: Bactericidal function of neutrophils from patients with acute bacterial infections and from diabetes. *J Infect Dis* 142:869–875, 1980
25. Nielson C, Hindson D: Inhibition of polymorphonuclear leukocyte respiratory burst by elevated glucose concentrations in vitro. *Diabetes* 38:1031–1035, 1989
26. Wilson RM, Reeves WG: Neutrophil phagocytosis and killing in insulin-dependent diabetes. *Clin Exp Immunol* 63:478–484, 1986
27. Sheetz M, King G: Molecular understanding of hyperglycemia's adverse effects for diabetic complications. *JAMA* 288:2579–2588, 2002
28. Oldenborg P, Sehlin J: Hyperglycemia in vitro attenuates insulin-stimulated chemokinesis in normal human neutrophils: role of protein kinase C activation. *J Leukocyte Biol* 65:635–640, 1999
29. Liu BF, Miyata S, Kojima H, Uriuhara A, Kusunoki H, Suzuki K, Kasuga M: Low phagocytic activity of resident peritoneal macrophages in diabetic mice: relevance to the formation of advanced glycation end products. *Diabetes* 48:2074–2082, 1999
30. Ortmeyer J, Mohsenin V: Inhibition of phospholipase D and superoxide generation by glucose in diabetic neutrophils. *Life Sciences* 59:255–262, 1996
31. Perner A, Nielsen S, Rask-Madsen J: High glucose impairs superoxide production from isolated blood neutrophils. *Intensive Care Med* 29:642–645, 2003
32. Sato N, Kashima K, Ohtani K, Shimizu H, Mori M: Epalrestat, an aldose reductase inhibitor, improves an impaired generation of oxygen-derived free radicals by neutrophils from poorly controlled NIDDM patients. *Diabetes Care* 20:995–998, 1997
33. Boland O, Blackwell C, Clarke B, Ewing D: Effects of ponalrestat, an aldose reductase inhibitor, on neutrophil killing of *Escherichia coli* and autonomic function in patients with diabetes mellitus. *Diabetes* 42:336–340, 1993
34. Mazade MA, Edwards MS: Impairment of type III group B *Streptococcus*-stimulated superoxide production and opsonophagocytosis by neutrophils in diabetes. *Mol Genet Metab* 73:259–267, 2001
35. Black CT, Hennessey PJ, Andrassy RJ: Short-term hyperglycemia depresses immunity through nonenzymatic glycosylation of circulating immunoglobulin. *J Trauma* 30:830–832; discussion 832–833, 1990
36. von Kanel R, Mills P, Dimsdale J: Short-term hyperglycemia induces lymphopenia and lymphocyte subset redistribution. *Life Sciences* 69:255–262, 2001
37. Bouter KP, Meyling FH, Hoekstra JB, Masurel N, Erkelens DW, Diepersloot RJ: Influence of blood glucose levels on peripheral lymphocytes in patients with diabetes mellitus. *Diabetes Res* 19:77–80, 1992
38. Kersten J, Schmelting T, Orth K, Pagel P, Warltier D: Acute hyperglycemia abolishes ischemic preconditioning in vivo. *Am J Physiol* 275:H721–H725, 1998
39. Kersten J, Toller W, Tessmer J, Pagel P, Warltier D: Hyperglycemia reduces coronary collateral blood flow through a nitric oxide-mediated mechanism. *Am J Physiol* 281:H2097–H2104, 2001
40. Ceriello A, Quagliaro L, D'Amico M, Di Filippo C, Marfella R, Nappo F, Berrino L, Rossi F, Giugliano D: Acute hyperglycemia induces nitrotyrosine formation and apoptosis in perfused heart from rat. *Diabetes* 51:1076–1082, 2002
41. Verma S, Maitland A, Weisel R, Li S, Fedak P, Pomroy N, Mickle D, Li R, Ko L, Rao V: Hyperglycemia exaggerates ischemia-reperfusion-induced cardiomyocyte injury: reversal with endothelin antagonism. *J Thorac Cardiovasc Surg* 123:1120–1124, 2002
42. D'Amico M, Marfella R, Nappo F, Di Filippo C, De Angelis L, Berrino L, Rossi F, Giugliano D: High glucose induces ventricular instability and increases vasomotor tone in rats. *Diabetologia* 44:464–470, 2001
43. Marfella R, Nappo F, Angelis LD, Paolesso G, Tagliamonte M, Giugliano D: Hemodynamic effects of acute hyperglycemia in type 2 diabetic patients. *Diabetes Care* 23:658–663, 2000
44. Marfella R, Nappo F, Angelis LD, Siniscalchi M, Rossi F, Giugliano D: The effect of acute hyperglycaemia on QTc duration in healthy man. *Diabetologia* 43:571–575, 2000
45. Cinar Y, Senyol A, Duman K: Blood viscosity and blood pressure: role of temperature and hyperglycemia. *American J Hypertens* 14:433–438, 2001
46. McKenna K, Smith D, Tormey W, Thompson C: Acute hyperglycaemia causes elevation in plasma atrial natriuretic peptide concentrations in type 1 diabetes mellitus. *Diabet Med* 17:512–517, 2000
47. Davi G, Catalano I, Averna M, Notarbartolo A, Strano A, Ciabattone G, Patrono C: Thromboxane biosynthesis and platelet function in type II diabetes mellitus. *N Engl J Med* 322:1769–1774, 1990
48. Knobler H, Savion N, Shenkman B, Kotev-Emeth S, Varon D: Shear-induced platelet adhesion and aggregation on subendothelium are increased in diabetic patients. *Thromb Res* 90:181–190, 1998
49. Davi G, Ciabattone G, Consoli A, Mezzetti A, Falco A, Santarone S, Pennese E, Vitacolonna E, Bucciarelli T, Costantini F, Capani F, Patrono C: In vivo formation of 8-iso-prostaglandin f2alpha and platelet activation in diabetes mellitus: effects of improved metabolic control and vitamin E supplementation. *Circulation* 99:224–229, 1999
50. Sakamoto T, Ogawa H, Kawano H, Hirai N, Miyamoto S, Takazoe K, Soejima J, Kugiyama K: Rapid change of platelet aggregability in acute hyperglycemia. Detection by a novel laser-light scattering method. *Thrombosis & Hemostasis* 83:475–479, 2000
51. Gesele P, Guglielmini G, DeAngelis M, Ciferri S, Ciofetta M, Falcinelli E, Lalli C, Ciabattone G, Davi G, Bolli G: Acute, short-term hyperglycemia enhances shear stress-induced platelet activation in patients with type II diabetes mellitus. *J Am Coll Cardiol* 41:1013–1020, 2003
52. Pandolfi A, Giaccari A, Cilli C, Alberta M, Morviducci L, Filippis ED, Buongiorno A, Pellegrini G, Capani F, Consoli A: Acute hyperglycemia and acute hyperinsulinemia decrease plasma fibrinolytic activity and increase plasminogen activator inhibitor type 1 in the rat. *Acta Diabetologica* 38:71–77, 2001
53. Morohoshi M, Fujisawa K, Uchimura I, Numano F: Glucose-dependent interleukin 6 and tumor necrosis factor production by human peripheral blood monocytes in vitro. *Diabetes* 45:954–959, 1996
54. Kado S, Nagase T, Nagata N: Circulating levels of interleukin-6, its soluble receptor and interleukin-6/interleukin-6 receptor complexes in patients with type 2 diabetes mellitus. *Acta Diabetol* 36:67–72, 1999
55. Mohamed-Ali V, Goodrick S, Rawesh A, Katz DR, Miles JM, Yudkin JS, Klein S, Coppack SW: Subcutaneous adipose tissue releases interleukin-6, but not tumor necrosis factor-alpha, in vivo. *J Clin Endocrinol Metab* 82:4196–4200, 1997
56. Pampfer S, Vanderheyden I, De Hertogh



- R: Increased synthesis of tumor necrosis factor- $\alpha$  in uterine explants from pregnant diabetic rats and in primary cultures of uterine cells in high glucose. *Diabetes* 46:1214–1224, 1997
57. Meldrum DR, Donnahoo KK: Role of TNF in mediating renal insufficiency following cardiac surgery: evidence of a postbypass cardiorenal syndrome. *J Surg Res* 85:185–199, 1999
  58. Guha M, Bai W, Nadler JL, Natarajan R: Molecular mechanisms of tumor necrosis factor alpha gene expression in monocytic cells via hyperglycemia-induced oxidant stress-dependent and -independent pathways. *J Biol Chem* 275:17728–17739, 2000
  59. Hattori Y, Hattori S, Sato N, Kasai K: High-glucose-induced nuclear factor kappaB activation in vascular smooth muscle cells. *Cardiovasc Res* 46:188–197, 2000
  60. Coughlan MT, Oliva K, Georgiou HM, Permezel JM, Rice GE: Glucose-induced release of tumour necrosis factor-alpha from human placental and adipose tissues in gestational diabetes mellitus. *Diabet Med* 18:921–927, 2001
  61. Lin Y, Rajala MW, Berger JP, Moller DE, Barzilai N, Scherer PE: Hyperglycemia-induced production of acute phase reactants in adipose tissue. *J Biol Chem* 276:42077–42083, 2001
  62. Esposito K, Nappo F, Marfella R, Giugliano G, Giugliano F, Ciotola M, Quagliari L, Ceriello A, Giugliano D: Inflammatory cytokine concentrations are acutely increased by hyperglycemia in humans: role of oxidative stress. *Circulation* 106:2067–2072, 2002
  63. Li D, Zhao L, Liu M, Du X, Ding W, Zhang J, Mehta JL: Kinetics of tumor necrosis factor alpha in plasma and the cardioprotective effect of a monoclonal antibody to tumor necrosis factor alpha in acute myocardial infarction. *Am Heart J* 137:1145–1152, 1999
  64. Das UN: Free radicals, cytokines and nitric oxide in cardiac failure and myocardial infarction. *Mol Cell Biochem* 215:145–152, 2000
  65. Ferrari R: Tumor necrosis factor in CHF: a double facet cytokine. *Cardiovasc Res* 37:554–559, 1998
  66. Meldrum DR, Dinarello CA, Shames BD, Cleveland JC, Jr., Cain BS, Banerjee A, Meng X, Harken AH: Ischemic preconditioning decreases postischemic myocardial tumor necrosis factor-alpha production: potential ultimate effector mechanism of preconditioning. *Circulation* 98:II214–II218; discussion II218–II219, 1998
  67. Mallat Z, Corbaz A, Scoazec A, Besnard S, Leseche G, Chvatchko Y, Tedgui A: Expression of interleukin-18 in human atherosclerotic plaques and relation to plaque instability. *Circulation* 104:1598–1603, 2001
  68. Romeo G, Liu W, Asnaghi V, Kern T, Lorenzi M: Activation of nuclear factor- $\kappa$ B induced by diabetes and high glucose regulates a proapoptotic program in retinal pericytes. *Diabetes* 51:2241–2248, 2002
  69. Nishikawa T, Edelstein D, Brownlee M: The missing link: a single unifying mechanism for diabetic complications. *Kidney Int Suppl* 77:S26–S30, 2000
  70. Yerneni KK, Bai W, Khan BV, Medford RM, Natarajan R: Hyperglycemia-induced activation of nuclear transcription factor  $\kappa$ B in vascular smooth muscle cells. *Diabetes* 48:855–864, 1999
  71. Morigi M, Angioletti S, Imberti B, Donadelli R, Micheletti G, Figliuzzi M, Remuzzi A, Zoja C, Remuzzi G: Leukocyte-endothelial interaction is augmented by high glucose concentrations and hyperglycemia in a NF- $\kappa$ B-dependent fashion. *J Clin Invest* 101:1905–1915, 1998
  72. Hofmann MA, Schiekofer S, Kanitz M, Klevesath MS, Joswig M, Lee V, Morcos M, Tritschler H, Ziegler R, Wahl P, Bierhaus A, Nawroth PP: Insufficient glyce-mic control increases nuclear factor- $\kappa$ B binding activity in peripheral blood mononuclear cells isolated from patients with type 1 diabetes. *Diabetes Care* 21:1310–1316, 1998
  73. Schiekofer NM, Andrassy M, Chen J, Rudofsky G, Schneider J, Wendt T, Stefan N, Humpert P, Fritsche A, Stumvoll M, Schleicher E, Haring H, Nawroth P, Bierhaus A: Acute hyperglycemia causes intracellular formation of CML and activation of ras, p42/44 MAPK, and nuclear factor- $\kappa$ B in PBMcs. *Diabetes* 52:621–633, 2003
  74. Marfella R, Quagliari L, Nappo F, Ceriello A, Giugliano D: Acute hyperglycemia induces an oxidative stress in healthy subjects. *J Clin Invest* 108:635–636, 2001
  75. Calles-Escandon J, Cipolla M: Diabetes and endothelial dysfunction: a clinical perspective. *Endocr Rev* 22:36–52, 2001
  76. Goligorsky MS, Chen J, Brodsky S: Workshop: endothelial cell dysfunction leading to diabetic nephropathy: focus on nitric oxide. *Hypertension* 37:744–748, 2001
  77. Williams S, Goldfine A, Timimi F, Ting H, Roddy M, Simonson D, Roddy M, Simonson D, Creager M: Acute hyperglycemia attenuates endothelium-dependent vasodilation in humans in vivo. *Circulation* 97:1695–1701, 1998
  78. Kawano H, Motoyama T, Hirashima O, Hirai N, Miyao Y, Sakamoto T, Kugiyama K, Ogawa H, Yasue H: Hyperglycemia rapidly suppresses flow-mediated endothelium-dependent vasodilation of brachial artery. *J Am Coll Cardiol* 34:146–154, 1999
  79. Shige H, Ishikawa T, Suzukawa M, Ito T, Nakajima K, Higashi K, Ayaori M, Tabata S, Ohsuzu F, Nakamura H: Endothelium-dependent flow-mediated vasodilation in the postprandial state in type 2 diabetes mellitus. *Am J Cardiol* 84:1272–1274, A1279, 1999
  80. Title LM, Cummings PM, Giddens K, Nassar BA: Oral glucose loading acutely attenuates endothelium-dependent vasodilation in healthy adults without diabetes: an effect prevented by vitamins C and E. *J Am Coll Cardiol* 36:2185–2191, 2000
  81. Beckman J, Goldfine A, Gordon M, Creager M: Ascorbate restores endothelium-dependent vasodilation impaired by acute hyperglycemia in humans. *Circulation* 103:1618–1623, 2001
  82. Giugliano D, Marfella R, Coppola L, Verrazzo G, Acampora R, Giunta R, Nappo F, Lucarelli C, D'Onofrio F: Vascular effects of acute hyperglycemia in humans are reversed by L-arginine: evidence for reduced availability of nitric oxide during hyperglycemia. *Circulation* 95:1783–1790, 1997
  83. Bagg W, Whalley G, Sathu A, Gamble G, Sharpe N, Braatvedt G: The effect of acute hyperglycaemia on brachial artery flow mediated dilatation in normal volunteers. *Austral NZ J Med* 30:344–350, 2000
  84. Brodsky SV, Morrishow AM, Dharia N, Gross SS, Goligorsky MS: Glucose scavenging of nitric oxide. *Am J Physiol Renal Physiol* 280:F480–F486, 2001
  85. Myers RE, Yamaguchi S: Nervous system effects of cardiac arrest in monkeys: preservation of vision. *Arch Neurol* 34:65–74, 1977
  86. Pulsinelli WA, Waldman S, Rawlinson D, Plum F: Moderate hyperglycemia augments ischemic brain damage: a neuropathologic study in the rat. *Neurology* 32:1239–1246, 1982
  87. Prado R, Ginsberg MD, Dietrich WD, Watson BD, Busto R: Hyperglycemia increases infarct size in collaterally perfused but not end-arterial vascular territories. *J Cereb Blood Flow Metab* 8:186–192, 1988
  88. Huang N, Wei J, Quast M: A comparison of the early development of ischemic brain damage in normoglycemic and hyperglycemic rats using magnetic resonance imaging. *Experimental Brain Research* 109:33–42, 1996
  89. Li PA, Kristian T, Shamloo M, Siesjo K: Effects of preischemic hyperglycemia on brain damage incurred by rats subjected to 2.5 or 5 minutes of forebrain ischemia. *Stroke* 27:1592–1601; discussion

- 1601–1592, 1996
90. Kawai N, Keep RF, Betz AL, Nagao S: Hyperglycemia induces progressive changes in the cerebral microvasculature and blood-brain barrier transport during focal cerebral ischemia. *Acta Neurochir Suppl. (Wien)* 71:219–221, 1998
91. Kawai N, Keep R, Betz A: Hyperglycemia and the vascular effects of cerebral ischemia. *Acta Neurochirurgica - Supplementum* 70:27–29, 1997
92. Lin B, Ginsberg M, Busto R: Hyperglycemic exacerbation of neuronal damage following forebrain ischemia: microglial, astrocytic and endothelial alterations. *Acta Neuropathologica* 96:610–620, 1998
93. Gisselsson L, Smith M, Siesjo B: Hyperglycemia and focal brain ischemia. *J Cereb Blood Flow Metab* 19:288–297, 1999
94. Hoxworth JM, Xu K, Zhou Y, Lust WD, LaManna JC: Cerebral metabolic profile, selective neuron loss, and survival of acute and chronic hyperglycemic rats following cardiac arrest and resuscitation. *Brain Res* 821:467–479, 1999
95. Li P, Shuaib A, Miyashita H, He Q, Siesjo B, Warner D: Hyperglycemia enhances extracellular glutamate accumulation in rats subjected to forebrain ischemia. *Stroke* 31:183–192, 2000
96. Capes S, Hunt D, Malmberg K, Pathak P, Gerstein H: Stress hyperglycemia and prognosis of stroke in nondiabetic and diabetic patients: a systematic overview. *Stroke* 32:2426–2432, 2001
97. Park WS, Chang YS, Lee M: Effects of hyperglycemia or hypoglycemia on brain cell membrane function and energy metabolism during the immediate reoxygenation-reperfusion period after acute transient global hypoxia-ischemia in the newborn piglet. *Brain Res* 901:102–108, 2001
98. Rytter A, Cronberg T, Asztely F, Nemali S, Wieloch T: Mouse hippocampal organotypic tissue cultures exposed to in vitro “ischemia” show selective and delayed CA 1 damage that is aggravated by glucose. *J Cereb Blood Flow Metab* 23:23–33, 2003
99. Ginsberg MD, Prado R, Dietrich WD, Busto R, Watson BD: Hyperglycemia reduces the extent of cerebral infarction in rats. *Stroke* 18:570–574, 1987
100. Sieber FE: The neurologic implications of diabetic hyperglycemia during surgical procedures at increased risk for brain ischemia. *J Clin Anesth* 9:334–340, 1997
101. Venables GS, Miller SA, Gibson G, Hardy JA, Strong AJ: The effects of hyperglycaemia on changes during reperfusion following focal cerebral ischaemia in the cat. *J Neurol Neurosurg Psychiatry* 48:663–669, 1985
102. Anderson RE, Tan WK, Martin HS, Meyer FB: Effects of glucose and PaO<sub>2</sub> modulation on cortical intracellular acidosis, NADH redox state, and infarction in the ischemic penumbra. *Stroke* 30:160–170, 1999
103. Kraig RP, Petito CK, Plum F, Pulsinelli WA: Hydrogen ions kill brain at concentrations reached in ischemia. *J Cereb Blood Flow Metab* 7:379–386, 1987
104. Petito CK, Kraig RP, Pulsinelli WA: Light and electron microscopic evaluation of hydrogen ion-induced brain necrosis. *J Cereb Blood Flow Metab* 7:625–632, 1987
105. Guyot LL, Diaz FG, O'Regan MH, Song D, Phillis JW: The effect of streptozotocin-induced diabetes on the release of excitotoxic and other amino acids from the ischemic rat cerebral cortex. *Neurosurgery* 48:385–390; discussion 390–381, 2001
106. Schurr A, Payne RS, Miller JJ, Tseng MT: Preischemic hyperglycemia-aggravated damage: evidence that lactate utilization is beneficial and glucose-induced corticosterone release is detrimental. *J Neurosci Res* 66:782–789, 2001
107. Christensen H, Boysen G: Blood glucose increases early after stroke onset: a study on serial measurements of blood glucose in acute stroke. *Eur J Neurol* 9:297–301, 2002
108. Ishii H, Arai T, Segawa H, Morikawa S, Inubushi T, Fukuda K: Effects of propofol on lactate accumulation and oedema formation in focal cerebral ischaemia in hyperglycaemic rats. *Br J Anaesth* 88:412–417, 2002
109. Parsons MW, Li T, Barber PA, Yang Q, Darby DG, Desmond PM, Gerraty RP, Tress BM, Davis SM: Combined (1)H MR spectroscopy and diffusion-weighted MRI improves the prediction of stroke outcome. *Neurology* 55:498–505, 2000
110. Parsons M, Barber P, Desmond P, Baird T, Darby D, Byrnes G, Tress B, Davis S: Acute hyperglycemia adversely affects stroke outcome: a magnetic resonance imaging and spectroscopy study. *Ann Neurol* 52:20–28, 2002
111. Dietrich WD, Alonso O, Busto R: Moderate hyperglycemia worsens acute blood-brain barrier injury after forebrain ischemia in rats. *Stroke* 24:111–116, 1993
112. Els T, Rother J, Beaulieu C, de Crespigny A, Moseley M: Hyperglycemia delays terminal depolarization and enhances repolarization after peri-infarct spreading depression as measured by serial diffusion MR mapping. *J Cereb Blood Flow Metab* 17:591–595, 1997
113. Li P, Rasquinha I, He Q, Siesjo B, Csiszar K, Boyd C, MacManus J: Hyperglycemia enhances DNA fragmentation after transient cerebral ischemia. *J Cereb Blood Flow Metab* 21:568–576, 2001
114. Lin B, Ginsberg MD, Busto R: Hyperglycemic but not normoglycemic global ischemia induces marked early intraneuronal expression of beta-amyloid precursor protein. *Brain Res* 888:107–116, 2001
115. Ste-Marie L, Hazell AS, Bemeur C, Butterworth R, Montgomery J: Immunohistochemical detection of inducible nitric oxide synthase, nitrotyrosine and manganese superoxide dismutase following hyperglycemic focal cerebral ischemia. *Brain Res* 918:10–19, 2001
116. Li P, Liu G, He Q, Floyd R, Siesjo B: Production of hydroxyl free radical by brain tissues in hyperglycemic rats subjected to transient forebrain ischemia. *Free Rad Biol Med* 27:1033–1040, 1999
117. Lockhart B, Bonhomme N, Roger A, Dorey G, Casara P, Lestage P: Protective effect of the antioxidant 6-ethoxy-2,2-pentamethylen-1,2-dihydroquinoline (S 33113) in models of cerebral neurodegeneration. *Eur J Pharmacol* 416:59–68, 2001
118. Prado R, Watson BD, Wester P: Effects of nitric oxide synthase inhibition on cerebral blood flow following bilateral carotid artery occlusion and recirculation in the rat. *J Cereb Blood Flow Metab* 13:720–723, 1993
119. Wang MJ, Huang HM, Hsieh SJ, Jeng KC, Kuo JS: Resveratrol inhibits interleukin-6 production in cortical mixed glial cells under hypoxia/hypoglycemia followed by reoxygenation. *J Neuroimmunol* 112:28–34, 2001
120. Nishikawa T, Edelstein D, Du XL, Yamagishi S, Matsumura T, Kaneda Y, Yorek MA, Beebe D, Oates PJ, Hammes HP, Giardino I, Brownlee M: Normalizing mitochondrial superoxide production blocks three pathways of hyperglycaemic damage. *Nature* 404:787–790, 2000
121. Booth G, Stalker TJ, Lefer AM, Scalia R: Elevated ambient glucose induces acute inflammatory events in the microvasculature: effects of insulin. *Am J Physiol Endocrinol Metab* 280:E848–E856, 2001
122. Giardino I, Edelstein D, Brownlee M: BCL-2 expression or antioxidants prevent hyperglycemia-induced formation of intracellular advanced glycation end-products in bovine endothelial cells. *J Clin Invest* 97:1422–1428, 1996
123. Graier WF, Posch K, Fleischhacker E, Wascher TC, Kostner GM: Increased superoxide anion formation in endothelial cells during hyperglycemia: an adaptive response or initial step of vascular dysfunction? *Diabetes Res Clin Pract* 45:153–160, 1999
124. Mohanty P, Hamouda W, Garg R, Aljada A, Ghanim H, Dandona P: Glucose challenge stimulates reactive oxygen species

- (ROS) generation by leucocytes. *J Clin Endocrinol Metab* 85:2970–2973, 2000
125. Du X, Edelstein D, Dimmeler S, Ju Q, Sui C, Brownlee M: Hyperglycemia inhibits endothelial nitric oxide synthase activity by posttranslational modification at the Akt site. *J Clin Invest* 108:1341–1348, 2001
  126. Guzik TJ, Mussa S, Gastaldi D, Sadowski J, Ratnatunga C, Pillai R, Channon KM: Mechanisms of increased vascular superoxide production in human diabetes mellitus: role of NAD(P)H oxidase and endothelial nitric oxide synthase. *Circulation* 105:1656–1662, 2002
  127. Sampson M, Davies I, Brown J, Ivory K, Hughes D: Monocyte and neutrophil adhesion molecule expression during acute hyperglycemia and after antioxidant treatment in type 2 diabetes and control patients. *Arterio Thromb Vasc Biol* 22:1187–1193, 2002
  128. Malmberg K, for the DIGAMI study group: Prospective randomised study of intensive insulin treatment on long term survival after acute myocardial infarction in patients with diabetes mellitus. *BMJ* 314:1512–1515, 1997
  129. Dandona P, Aljada A, Mohanty P: The anti-inflammatory and potential anti-atherogenic effect of insulin: a new paradigm. *Diabetologia* 45:924–930, 2002
  130. Dandona P, Aljada A, Bandyopadhyay A: The potential therapeutic role of insulin in acute myocardial infarction in patients admitted to intensive care and in those with unspecified hyperglycemia. *Diabetes Care* 26:516–519, 2003
  131. Das UN: Is insulin an endogenous cardioprotector? *Crit Care* 6:389–393, 2002
  132. Melidonis A, Stefanidis A, Tournis S, Manoussakis S, Handanis S, Zairis M, Dadiotis L, Foussas S: The role of strict metabolic control by insulin infusion on fibrinolytic profile during an acute coronary event in diabetic patients. *Clin Cardiol* 23:160–164, 2000
  133. Machtay I, Syrkis I, Nissimov MR, Lobel H: Potassium, glucose and insulin administration in acute myocardial infarction: a five-year study. *J Am Geriatr Soc* 24:534–537, 1976
  134. Rogers WJ, Stanley AW, Jr., Breinig JB, Prather JW, McDaniel HG, Moraski RE, Mantle JA, Russell RO, Jr., Rackley CE: Reduction of hospital mortality rate of acute myocardial infarction with glucose-insulin-potassium infusion. *Am Heart J* 92:441–454, 1976
  135. Russell RO, Jr., Rogers WJ, Mantle JA, McDaniel HG, Rackley CE: Glucose-insulin-potassium, free fatty acids and acute myocardial infarction in man. *Circulation* 53:1207–209, 1976
  136. Rogers WJ, Russell RO, Jr., McDaniel HG, Rackley CE: Acute effects of glucose-insulin-potassium infusion on myocardial substrates, coronary blood flow and oxygen consumption in man. *Am J Cardiol* 40:421–428, 1977
  137. Rackley CE, Russell RO, Jr., Rogers WJ, Mantle JA, McDaniel HG: Glucose-insulin-potassium infusion in acute myocardial infarction: review of clinical experience. *Postgrad Med* 65:93–99, 1979
  138. Mantle JA, Rogers WJ, Smith LR, McDaniel HG, Papapietro SE, Russell RO, Jr., Rackley CE: Clinical effects of glucose-insulin-potassium on left ventricular function in acute myocardial infarction: results from a randomized clinical trial. *Am Heart J* 102:313–324, 1981
  139. McDaniel HG, Papapietro SE, Rogers WJ, Mantle JA, Smith LR, Russell RO, Jr., Rackley CE: Glucose-insulin-potassium induced alterations in individual plasma free fatty acids in patients with acute myocardial infarction. *Am Heart J* 102:10–15, 1981
  140. McDaniel HG, Rogers WJ, Russell RO, Jr., Rackley CE: Improved myocardial contractility with glucose-insulin-potassium infusion during pacing in coronary artery disease. *Am J Cardiol* 55:932–936, 1985
  141. Lazar HL: Enhanced preservation of acutely ischemic myocardium and improved clinical outcomes using glucose-insulin-potassium (GIK) solutions. *Am J Cardiol* 80:90A–93A, 1997
  142. Lazar HL, Chipkin S, Philippides G, Bao Y, Apstein C: Glucose-insulin-potassium solutions improve outcomes in diabetics who have coronary artery operations. *Ann Thorac Surg* 70:145–150, 2000
  143. Lazar HL, Philippides G, Fitzgerald C, Lancaster D, Shemin RJ, Apstein C: Glucose-insulin-potassium solutions enhance recovery after urgent coronary artery bypass grafting. *J Thorac Cardiovasc Surg* 113:354–360; discussion 360–352, 1997
  144. Lazar HL, Zhang X, Rivers S, Bernard S, Shemin RJ: Limiting ischemic myocardial damage using glucose-insulin-potassium solutions. *Ann Thorac Surg* 60:411–416, 1995
  145. Lazar HL, Fitzgerald C, Gross S, Heeren T, Aldea GS, Shemin RJ: Determinants of length of stay after coronary artery bypass graft surgery. *Circulation* 92:II20–II24, 1995
  146. Apstein CS: Glucose-insulin-potassium for acute myocardial infarction: remarkable results from a new prospective, randomized trial. *Circulation* 98:2223–2226, 1998
  147. Scott JF, Robinson GM, French JM, O'Connell JE, Alberti KG, Gray CS: Glucose potassium insulin infusions in the treatment of acute stroke patients with mild to moderate hyperglycemia: the Glucose Insulin in Stroke Trial (GIST). *Stroke* 30:793–799, 1999
  148. Cave AC, Ingwall JS, Friedrich J, Liao R, Saupe KW, Apstein CS, Eberli FR: ATP synthesis during low-flow ischemia: influence of increased glycolytic substrate. *Circulation* 101:2090–2096, 2000
  149. Marano L, Bestetti A, Lomuscio A, Tagliabue L, Castini D, Tarricone D, Dario P, Tarolo GL, Fiorentini C: Effects of infusion of glucose-insulin-potassium on myocardial function after a recent myocardial infarction. *Acta Cardiol* 55:9–15, 2000
  150. Scott J, Robinson G, French J, O'Connell J, Alberti K, Gray C: Blood pressure response to glucose potassium insulin therapy in patients with acute stroke with mild to moderate hyperglycaemia. *J Neurol Neurosurg Psych* 70:401–404, 2001
  151. Szabo Z, Arnqvist H, Hakanson E, Jorfeldt L, Svedjeholm R: Effects of high-dose glucose-insulin-potassium on myocardial metabolism after coronary surgery in patients with type II diabetes. *Clin Sci (Lond)* 101:37–43, 2001
  152. Ramanathan T, Shirota K, Morita S, Nishimura T, Huang Y, Hunyor S: Glucose-insulin-potassium solution improved left ventricular mechanics in diabetes. *Ann Thorac Surg* 73:582–587, 2002
  153. Svedjeholm R, Huljebrant I, Hakanson E, Vanhanen I: Glutamate and high-dose glucose-insulin-potassium (GIK) in the treatment of severe cardiac failure after cardiac operations. *Ann Thorac Surg* 59: S23–S30, 1995
  154. Apstein CS, Taegtmeier H: Glucose-insulin-potassium in acute myocardial infarction: the time has come for a large, prospective trial. *Circulation* 96:1074–1077, 1997
  155. Weiss JN, Lamp ST: Glycolysis preferentially inhibits ATP-sensitive K<sup>+</sup> channels in isolated guinea pig cardiac myocytes. *Science* 238:67–69, 1987
  156. Mallet RT, Hartman DA, Bunger R: Glucose requirement for postischemic recovery of perfused working heart. *Eur J Biochem* 188:481–493, 1990
  157. Eberli FR, Weinberg EO, Grice WN, Horowitz GL, Apstein CS: Protective effect of increased glycolytic substrate against systolic and diastolic dysfunction and increased coronary resistance from prolonged global underperfusion and reperfusion in isolated rabbit hearts perfused with erythrocyte suspensions. *Circ Res* 68:466–481, 1991
  158. Oliver MF, Opie LH: Effects of glucose and fatty acids on myocardial ischaemia and arrhythmias. *Lancet* 343:155–158,



- 1994
159. Xu KY, Zweier JL, Becker LC: Functional coupling between glycolysis and sarco-plasmic reticulum  $\text{Ca}^{2+}$  transport. *Circ Res* 77:88–97, 1995
160. Manzella D, Grella R, Marfella R, Giugliano D, Paolisso G: Elevated post-prandial free fatty acids are associated with cardiac sympathetic overactivity in type II diabetic patients. *Diabetologia* 45: 1737–1738, 2002
161. Oliver MF: Metabolic causes and prevention of ventricular fibrillation during acute coronary syndromes. *Am J Med* 112:305–311, 2002
162. Zhu P, Lu L, Xu Y, Greyson C, Schwartz GG: Glucose-insulin-potassium preserves systolic and diastolic function in ischemia and reperfusion in pigs. *Am J Physiol Heart Circ Physiol* 278:H595–H603, 2000
163. Szabo Z, Hakanson E, Jorfeldt L, Sved-jeholm R: Myocardial uptake and release of substrates in type II diabetics undergoing coronary surgery. *Scand Cardio-vasc J* 35:207–211, 2001
164. Stanley AW, Jr., Moraski RE, Russell RO, Rogers WJ, Mantle JA, Kreisberg RA, McDaniel HG, Rackley CE: Effects of glucose-insulin-potassium on myocardial substrate availability and utilization in stable coronary artery disease: studies on myocardial carbohydrate, lipid and oxygen arterial-coronary sinus differences in patients with coronary artery disease. *Am J Cardiol* 36:929–937, 1975
165. Steinberg HO, Brechtel G, Johnson A, Fineberg N, Baron AD: Insulin-mediated skeletal muscle vasodilation is nitric oxide dependent: a novel action of insulin to increase nitric oxide release. *J Clin Invest* 94:1172–1179, 1994
166. Cardillo C, Nambi S, Kilcoyne C, Choucair W, Katz A, Quon M, Panza J: Insulin stimulates both endothelin and nitric oxide activity in the human forearm. *Circulation* 100:820–825, 1999
167. Chaudhuri A, Kanjwal G, Mohanty P, Rao S, Sung BH, Wilson MF, Dandona P: Insulin-induced vasodilatation of internal carotid artery. *Metabolism* 48:1470–1473, 1999
168. Vehkavaara S, Makimattila S, Schlenzka A, Vakkilainen J, Westerbacka J, Yki-Jarvinen H: Insulin therapy improves endothelial function in type 2 diabetes. *Arterioscler Thromb Vasc Biol* 20:545–550, 2000
169. Rask-Madsen C, Ihlemann N, Krarup T, Christiansen E, Kober L, Nervi Kistorp C, Torp-Pedersen C: Insulin therapy improves insulin-stimulated endothelial function in patients with type 2 diabetes and ischemic heart disease. *Diabetes* 50: 2611–2618, 2001
170. Gaenger H, Neumayr G, Marschang p, Sturm W, Lechleitner M, Foger B, Kirch-mair R, Patsch J: Effect of insulin therapy on endothelium-dependent dilation in type 2 diabetes mellitus. *Am J Cardiol* 89: 431–434, 2002
171. Evans M, Anderson R, Smith J, Khan N, Graham J, Thomas A, Morris K, Deely D, Frenneaux M, Davies J, Rees A: Effects of insulin lispro and chronic vitamin C therapy on postprandial lipaemia, oxidative stress and endothelial function in patients with type 2 diabetes mellitus. *Eur J Clin Invest* 33:231–238, 2003
172. Arcaro G, Cretti A, Balzano S, Lechi A, Muggeo M, Bonora E, Bonadonna R: Insulin causes endothelial dysfunction in humans: sites and mechanisms. *Circulation* 105:576–582, 2002
173. Aljada A, Dandona P: Effect of insulin on human aortic endothelial nitric oxide synthase. *Metabolism* 49:147–150, 2000
174. Das UN: Is insulin an antiinflammatory molecule? *Nutrition* 17:409–413, 2001
175. Das UN: Insulin and inflammation: further evidence and discussion. *Nutrition* 18:526–527, 2002
176. Hansen T, Thiel S, Wouters P, Christiansen J, VandenBerghe B: Intensive insulin therapy exerts antiinflammatory effects in critically ill patients and counteracts the adverse effect of low mannose-binding lectin levels. *J Clin Endocrinol Metab* 88:1082–1088, 2003
177. Aikawa R, Nawano M, Gu Y, Katagiri H, Asano T, Zhu W, Nagai R, Komuro I: Insulin prevents cardiomyocytes from oxidative stress-induced apoptosis through activation of PI3 kinase/Akt. *Circulation* 102:2873–2879, 2000
178. Aljada A, Saadeh R, Assian E, Ghanim H, Dandona P: Insulin inhibits the expression of intercellular adhesion molecule-1 by human aortic endothelial cells through stimulation of nitric oxide. *J Clin Endocrinol Metab* 85:2572–2575, 2000
179. Aljada A, Ghanim H, Saadeh R, Dandona P: Insulin inhibits NF-kappaB and MCP-1 expression in human aortic endothelial cells. *Journal of Clinical Endocrinol Metab* 86:450–453, 2001
180. Dandona P, Aljada A, Mohanty P, Ghanim H, Hamouda W, Assian E, Ahmed S: Insulin inhibits intranuclear nuclear factor kappaB and stimulates IkappaB in mononuclear cells in obese subjects: evidence for an anti-inflammatory effect? *J Clin Endocr Metab* 86:3257–3265, 2001
181. Aljada A, Ghanim H, Mohanty P, Kapur N, Dandona P: Insulin inhibits the pro-inflammatory transcription factor early growth response gene-1 (Egr)-1 expression in mononuclear cells (MNC) and reduces plasma tissue factor (TF) and plasminogen activator inhibitor-1 (PAI-1) concentrations. *J Clin Endocr Metab* 87: 1419–1422, 2002
182. Jonassen A, Sack M, Mjos O, Yellon D: Myocardial protection by insulin at reperfusion requires early administration and is mediated via Akt and p70s6 kinase cell-survival signaling. *Circ Res* 89:1191–1198, 2001
183. Guazzi M, Brambilla R, Vita SD, Guazzi M: Diabetes worsens pulmonary diffusion in heart failure, and insulin counteracts this effect. *Am J Respir Crit Care Med* 166:978–982, 2002
184. Wiener C, Sylvester J: Effects of insulin, glucose analogues, and pyruvate on vascular responses to anoxia in isolated ferret lungs. *J Appl Physiol* 74:2426–2431, 1993
185. Hamilton MG, Tranmer BI, Auer RN: Insulin reduction of cerebral infarction due to transient focal ischemia. *J Neurosurg* 82:262–268, 1995
186. Melin J, Hellberg L, Larsson E, Zezina L, Fellstrom B: Protective effect of insulin on ischemic renal injury in diabetes mellitus. *Kidney Int* 61:1383–1392, 2002
187. Gore D, Wolf S, Herndon D, Wolfe R: Relative influence of glucose and insulin on peripheral amino acid metabolism in severely burned patients. *J Parenter Enter Nutr* 26:271–277, 2002
188. Westerbacka J, Yki-Jarvinen H, Turpeinen A, Rissanen A, Vehkavaara S, Syrjala M, Lassila R: Inhibition of platelet-collagen interaction: an in vivo action of insulin abolished by insulin resistance in obesity. *Arterioscler Thromb Vasc Biol* 22:167–172, 2002
189. Levitan CS, Magee MF: Hospital management of diabetes. *Endocrinol Metab Clin North Am* 29:745–770, 2000
190. Leahy JL, Bonner-Weir S, Weir GC:  $\beta$ -cell dysfunction induced by chronic hyperglycemia: current ideas on mechanism of impaired glucose-induced insulin secretion. *Diabetes Care* 15:442–455, 1992
191. Pomposelli J, Baxter J, Babineau T, Pomfret E, Driscoll D, Forse R, Bistrian B: Early postoperative glucose control predicts nosocomial infection rate in diabetic patients. *J Parenter Enter Nutr* 22: 77–81, 1998
192. Capes S, Hunt D, Malmberg K, Gerstein H: Stress hyperglycaemia and increased risk of death after myocardial infarction in patients with and without diabetes: a systematic overview. *Lancet* 355:773–778, 2000
193. Bolk J, van der Ploeg T, Cornel JH, Arnold AE, Sepers J, Umans VA: Impaired glucose metabolism predicts mortality after a myocardial infarction. *Int J Cardiol* 79:207–214, 2001
194. Malmberg K, Rydén L, Efendic S, Herlitz J, Nicol P, Waldenström A, Wedel H,



- Welin L: Randomized trial of insulin-glucose infusion followed by subcutaneous insulin treatment in diabetic patients with acute myocardial infarction (DIGAMI study): effects on mortality at 1 year. *J Am Coll Cardiol* 26:57–65, 1995
195. Malmberg K, Yusuf S, Gerstein HC, Brown J, Zhao F, Hunt D, Piegas L, Calvin J, Keltai M, Budaj A: Impact of diabetes on long-term prognosis in patients with unstable angina and non-Q-wave myocardial infarction: results of the OASIS (Organization to Assess Strategies for Ischemic Syndromes) Registry. *Circulation* 102:1014–1019, 2000
  196. Furnary A, Zerr K, Grunkemeier G, Starr A: Continuous intravenous insulin infusion reduces the incidence of deep sternal wound infection in diabetic patients after cardiac surgical procedures. *Ann Thorac Surg* 67:352–362, 1999
  197. Furnary AP, Gao G, Grunkemeier GL, Wu Y, Zerr KJ, Bookin SO, Floten HS, Starr A: Continuous insulin infusion reduces mortality in patients with diabetes undergoing coronary artery bypass grafting. *J Thorac Cardiovasc Surg* 125:1007–1021, 2003
  198. Zerr KJ, Furnary AP, Grunkemeier GL, Bookin S, Kanhere V, Starr A: Glucose control lowers the risk of wound infection in diabetics after open heart operations. *Ann Thorac Surg* 63:356–361, 1997
  199. Golden S, Peart-Vigilance C, Kao W, Brancati F: Perioperative glycemic control and the risk of infectious complications in a cohort of adults with diabetes. *Diabetes Care* 22:1408–1414, 1999
  200. Van den Berghe G, Wouters PJ, Bouillon R, Weekers F, Verwaest C, Schetz M, Vlasselaers D, Ferdinande P, Lauwers P: Outcome benefit of intensive insulin therapy in the critically ill: insulin dose versus glycemic control. *Crit Care Med* 31:359–366, 2003
  201. Bruno A, Biller J, Adams HP, Jr., Clarke WR, Woolson RF, Williams LS, Hansen MD: Acute blood glucose level and outcome from ischemic stroke: Trial of ORG 10172 in Acute Stroke Treatment (TOAST) Investigators. *Neurology* 52:280–284, 1999
  202. Pulsinelli WA, Levy DE, Sigsbee B, Scherer P, Plum F: Increased damage after ischemic stroke in patients with hyperglycemia with or without established diabetes mellitus. *Am J Med* 74:540–544, 1983
  203. Demchuk AM, Morgenstern LB, Krieger DW, Linda Chi T, Hu W, Wein TH, Hardy RJ, Grotta JC, Buchan AM: Serum glucose level and diabetes predict tissue plasminogen activator-related intracerebral hemorrhage in acute ischemic stroke. *Stroke* 30:34–39, 1999
  204. Kiers L, Davis SM, Larkins R, Hopper J, Tress B, Rossiter SC, Carlin J, Ratnaike S: Stroke topography and outcome in relation to hyperglycaemia and diabetes. *J Neurol Neurosurg Psychiatry* 55:263–270, 1992
  205. Williams LS, Rotich J, Qi R, Fineberg N, Espay A, Bruno A, Fineberg SE, Tierney WR: Effects of admission hyperglycemia on mortality and costs in acute ischemic stroke. *Neurology* 59:67–71, 2002
  206. Scott JF, Robinson GM, French JM, O'Connell JE, Alberti KG, Gray CS: Prevalence of admission hyperglycaemia across clinical subtypes of acute stroke. *Lancet* 353:376–377, 1999
  207. Brady P, Terzic A: The sulfonylurea controversy: more questions from the heart. *J Am Coll Cardiol* 31:950–956, 1998
  208. Howes L, Sundaresan P, Lykos D: Cardiovascular effects of oral hypoglycemic drugs. *Clin Exp Pharmacol Physiol* 23:201–206, 1996
  209. Meinert C, Knatterud G, Prout T, Klimt C, University Group Diabetes Program: A study of the effects of hypoglycemic agents on vascular complications in patients with adult-onset diabetes II: mortality results. *Diabetes* 19:789–830, 1970
  210. UKPDS Study Group: Intensive blood-glucose control with sulphonylureas or insulin compared with conventional treatment and risk of complications in patients with type 2 diabetes (UKPDS 33). *Lancet* 352:837–853, 1998
  211. Murry C, Jennings R, Reimer K: Preconditioning with ischemia: a delay of lethal cell injury in ischemic myocardium. *Circulation* 74:1124–1136, 1986
  212. Deutsch E, Berger M, Kussmaul W, Hirschfeld J, Herrmann H, Laskey W: Adaptation to ischemia during percutaneous transluminal coronary angioplasty: clinic, hemodynamic, and metabolic features. *Circulation* 82:2044–2051, 1990
  213. Terzic A, Jahangir A, Kurachi Y: Cardiac ATP-sensitive K<sup>+</sup> channels: regulation by intracellular nucleotides and K<sup>+</sup> channel-opening drugs. *Am J Physiol* 269:C525–C545, 1995
  214. Ashcroft S, Ashcroft F: The sulfonylurea receptor. *Biochim Biophys Acta* 1175:45–59, 1992
  215. Engler R, Yellon D: Sulfonylurea K-ATP blockade in type II diabetes and preconditioning in cardiovascular disease: time for reconsideration. *Circulation* 94:2297–2301, 1996
  216. Cleveland J, Meldrum D, Cain B, Banerjee A, Harken A: Oral sulfonylurea hypoglycemic agents prevent ischemic preconditioning in human myocardium: two paradoxes revisited. *Circulation* 96:29–32, 1997
  217. Tomai F, Crea F, Gaspardone A, Versaci F, Paulis RD: Ischemic preconditioning during coronary angioplasty is prevented by glibenclamide, a selective ATP-sensitive K<sup>+</sup> channel blocker. *Circulation* 90:700–705, 1994
  218. Horimoto H, Nakai Y, Mieno S, Nomura Y, Nakahara K, Sasaki S: Oral hypoglycemic sulfonylurea glimepiride preserves the myoprotective effects of ischemic preconditioning. *J Surg Res* 105:181–188, 2002
  219. Gribble F, Tucker S, Seino S, Ashcroft F: Tissue specificity of sulfonylureas: studies on cloned cardiac and beta-cell K(ATP) channels. *Diabetes* 47:1412–1418, 1998
  220. Legtenberg R, Houston R, Oeseburg B, Smits P: Effects of sulfonylurea derivatives on ischemia-induced loss of function in the isolated rat heart. *Eur J Pharmacol* 419:85–92, 2001
  221. Mocanu M, Maddock H, Baxter G, Lawrence C, Standen N, Yellon D: Glimepiride, a novel sulfonylurea, does not abolish myocardial protection afforded by either ischemic preconditioning or diazoxide. *Circulation* 103:3111–3116, 2001
  222. Niesznier E, Posa I, Kocsis E, Pogatsa G, Preda I, Koltai M: Influence of diabetic state and that of different sulfonylureas on the size of myocardial infarction with and without ischemic preconditioning in rabbits. *Exper Clin Endocr Diab* 110:212–218, 2002
  223. Klepzig H, Kober G, Matter C, Luus H, Schneider H, Boedeker K, Kiowski W, Amann F, Gruber D, Harris S, Burger W: Sulfonylureas and ischaemic preconditioning; a double-blind, placebo-controlled evaluation of glimepiride and glibenclamide. *Eur Heart J* 20:439–446, 1999
  224. Legtenberg R, Houston R, Smits P, Oeseburg B: Hemodynamic changes caused by glibenclamide in isolated, working, erythrocyte perfused rat heart. *Advances in Exper Med Biol* 471:257–263, 1999
  225. Najeed S, Khan I, Molnar J, Somberg J: Differential effect of glyburide (glibenclamide) and metformin on QT dispersion: a potential adenosine triphosphate sensitive K<sup>+</sup> channel effect. *Am J Cardiol* 90:1103–1106, 2002
  226. Dhein S, Pejman P, Krusemann K: Effects of the I(K-ATP) blockers glibenclamide and HMR 1883 on cardiac electrophysiology during ischemia and reperfusion. *Eur J Pharmacology* 398:273–284, 2000
  227. Ren J, Dominguez L, Sowers J, Davidoff A: Metformin but not glyburide prevents high glucose-induced abnormalities in relaxation and intracellular Ca<sup>++</sup> transients in adult rat ventricular myocytes. *Diabetes* 48:2059–2065, 1999

228. Scognamiglio R, Avogaro A, Kreutzenberg Sd, Negut C, Palisi M, Bagolin E, Tiengo A: Effects of treatment with sulfonylurea drugs or insulin on ischemia-induced myocardial dysfunction in type 2 diabetes. *Diabetes* 51:808–812, 2002
229. Garratt KN, Brady PA, Hassinger NL, et al.: Sulfonylurea drugs increase early mortality in patients with diabetes mellitus after direct angioplasty for acute myocardial infarction. *J Am Coll Cardiol* 33:119–124, 1999
230. O'Keefe J, Blackstone E, Sergeant P, McCallister B: The optimal mode of coronary revascularization for diabetics. *Eur Heart J* 19:1696–1703, 1998
231. Aronow W, Ahn C: Incidence of new coronary events in older persons with diabetes mellitus and prior myocardial infarction treated with sulfonylureas, insulin metformin and diet alone. *Am J Cardiol* 88:556–557, 2001
232. Klamann A, Sarfert P, Launhardt V, Schulte G, Schmiegler W, Nauck M: Myocardial infarction in diabetic vs non-diabetic subjects: survival and infarct size following therapy with sulfonylureas (glibenclamide). *Eur Heart J* 21:220–229, 2000
233. Brady P, Al-Suwaidi J, Kopecky S, Terzic A: Sulfonylureas and mortality in diabetic patients after myocardial infarction. *Circulation* 97:709–710, 1998
234. Davis T, Parsons R, Broadhurst R, Hobbs M, Jamrozik K: Arrhythmias and mortality after myocardial infarction in diabetic patients: relationship to diabetes treatment. *Diabetes Care* 21:637–640, 1998
235. Halkin A, Roth A, Jonas M, Behar S: Sulfonylureas are not associated with increased mortality in diabetics treated with thrombolysis for acute myocardial infarction. *J Thromb Thrombolysis* 12: 177–184, 2001
236. Jollis J, Simpson R, Cascio W, Chowdhury M, Crouse J, Smith S: Relation between sulfonylurea therapy, complications, and outcome for elderly patients with acute myocardial infarction. *Am Heart J* 128:S376–S380, 1999
237. Weih M, Amberger N, Wegener S, Dimagl U, Reuter T, Einhaupl K: Sulfonylurea drugs do not influenced initial stroke severity and in-hospital outcome in stroke patients with diabetes. *Stroke* 32:2029–2032, 2001
238. Malmberg K, Norhammar A, Wedel H, Ryden L: Glycometabolic state at admission: important risk marker of mortality in conventionally treated patients with diabetes mellitus and acute myocardial infarction: long-term results from the Diabetes and Insulin-Glucose infusion in Acute Myocardial Infarction (DIGAMI) Study. *Circulation* 99:2626–2632, 1999
239. Miller C, Phillips L, Ziemer D, Gallina D, Cook C, El-Kebbi I: Hypoglycemia in patients with type 2 diabetes mellitus. *Arch Intern Med* 161:1653–1659, 2001
240. Harrower A: Comparative tolerability of sulphonylureas in diabetes mellitus. *Drug Safety* 22:313–320, 2000
241. UKPDS Study Group: Effect of intensive blood-glucose control with metformin on complications in overweight patients with type 2 diabetes (UKPDS 34). *Lancet* 352:854–865, 1998
242. Misbin R, Green L, Stadel B, Gueriguian J, Gubbi A, Alexander G: Lactic acidosis in patients with diabetes treated with metformin. *N Engl J Med* 338:265–266, 1998
243. Emslie-Smith A, Boyle D, Evans J, Sullivan F, Morris A: Contraindications to metformin therapy in patients with type 2 diabetes: a population-based study of adherence to prescribing guidelines. *Diabet Med* 18:483–488, 2001
244. Horlen C, Malone R, Bryant B, Dennis B, Carey T, Pignone M, Rothman R: Frequency of inappropriate metformin prescriptions. *JAMA* 287:2504–2505, 2002
245. Sulkin T, Bosman D, Krentz A: Contraindications to metformin therapy in patients with NIDDM. *Diabetes Care* 20: 925–928, 1997
246. Calabrese A, Coley K, DaPos S, Swanson D, Rao R: Evaluation of prescribing practices: risk of lactic acidosis with metformin therapy. *Arch Intern Med* 162: 434–437, 2002
247. Masoudi FA, Wang Y, Inzucchi SE, Setaro JF, Havranek EP, Foody JM, Krumholz HM: Metformin and thiazolidinedione use in Medicare patients with heart failure. *JAMA* 290:81–85, 2003
248. Salpeter S, Greyber E, Pasternak G, Salpeter E: Metformin does not increase fatal or nonfatal lactic acidosis or blood lactate levels in type 2 diabetes mellitus (Review Article). *Cochrane Database Syst Rev* 2:CD002967, 2002
249. Gillies P, Dunn C: Pioglitazone. *Drugs* 60:333–343, 2000
250. Malinowski J, Bolesta S: Rosiglitazone in the treatment of type 2 diabetes mellitus: a critical review. *Clin Ther* 22:1151–1168, 2000
251. Idris I, Gray S, Donnelly R: Rosiglitazone and pulmonary oedema: an acute dose-dependent effect on human endothelial cell permeability. *Diabetologia* 46:488–490, 2003
252. Choi S, Choi D, Ko Y, Chang YS, Cho Y, Lim S, Nam M, Lee H, Cha B: Preventive effects of rosiglitazone on restenosis after coronary stenting in patients with type 2 diabetes (Abstract). *Diabetes* 52 (Suppl. 1):A19, 2003
253. Lalli C, Ciofetta M, Del Sindaco P, Torlone E, Pampanelli S, Compagnucci P, Cartechini MG, Bartocci L, Brunetti P, Bolli GB: Long-term intensive treatment of type 1 diabetes with the short-acting insulin analog lispro in variable combination with NPH insulin at mealtime. *Diabetes Care* 22:468–477, 1999
254. Clement S, Still JG, Kosutic G, McAllister RG: Oral insulin product hexyl-insulin monoconjugate 2 (HIM2) in type 1 diabetes mellitus: the glucose stabilization effects of HIM2. *Diabetes Technol Ther* 4:459–466, 2002
255. Queale WS, Seidler AJ, Brancati FL: Glycemic control and sliding scale insulin use in medical inpatients with diabetes mellitus. *Arch Intern Med* 157:545–552, 1997
256. Gearhart J, Duncan JL, Replogle WH, Forbes RC, Walley EJ: Efficacy of sliding-scale insulin therapy: a comparison with prospective regimens. *Fam Pract Res J* 14:313–322, 1994
257. Walts LF, Miller J, Davidson MB, Brown J: Perioperative management of diabetes mellitus. *Anesthesiology* 55:104–109, 1981
258. Genuth SM: Constant intravenous insulin infusion in diabetic ketoacidosis. *JAMA* 223:1348–1351, 1973
259. Kidson W, Casey J, Kraegen E: Treatment of severe diabetes mellitus by insulin infusion. *Br Med J* 2:691–694, 1974
260. Page MM, Alberti KG, Greenwood R, Gumaa KAA, Hockaday TD, Lowy C, Nabarro JD, Pyke DA, Sonksen PH, Watkins PJ, West TE: Treatment of diabetic coma with continuous low dose infusion of insulin. *Br Med J* 2:687–690, 1974
261. Semple PF, White C, Manderson WG: Continuous intravenous infusion of small doses of insulin in treatment of diabetic ketoacidosis. *Br Med J* 2:694–698, 1974
262. Soler NG, FitzGerald MG, Wright AD, Malins JM: Comparative study of different insulin regimens in management of diabetic ketoacidosis. *Lancet* 2:1221–1224, 1975
263. Kitabchi AE, Ayyagari V, Guerra SMO: The efficacy of low-dose versus conventional therapy of insulin for treatment of diabetic ketoacidosis. *Ann Intern Med* 84: 633–638, 1976
264. Alberti KGMM: Comparison of different insulin regimens in diabetic ketoacidosis. *Lancet* 1:83–84, 1976
265. Alberti KGMM: Low-dose insulin in the treatment of diabetic ketoacidosis. *Arch Intern Med* 137:1367–1376, 1977
266. Fisher JN, Shahshahani MN, Kitabchi AE: Diabetic ketoacidosis: low-dose insulin therapy by various routes. *N Engl J Med* 297:238–241, 1977
267. Bienia R, Ripoll I: Diabetic ketoacidosis. *JAMA* 241:510–511, 1979

268. Sacks HS, Shahshahani M, Kitabchi AE, Fisher JN, Young RT: Similar responsiveness of diabetic ketoacidosis to low-dose insulin by intramuscular injection and albumin-free infusion. *Ann Intern Med* 90:36–42, 1979
269. Levine SN, Loewenstein JE: Treatment of diabetic ketoacidosis. *Arch Intern Med* 141:713–715, 1981
270. Berger W, Keller U: Treatment of diabetic ketoacidosis and nonketotic hyperosmolar diabetic coma. *Baillieres Clin Endocrinol Metab* 6:1–22, 1992
271. Siperstein MD: Diabetic ketoacidosis and hyperosmolar coma. *Endocrinol Metab Clin North Am* 21:415–432, 1992
272. Fleckman AM: Diabetic Ketoacidosis. *Endocrinol Metab Clin North Am* 22:181–207, 1993
273. Umpierrez GE, Kelly JP, Navarrete JE: Hyperglycemic crises in urban blacks. *Arch Intern Med* 157:669–675, 1997
274. Wagner A, Risse A, Brill HL, Wienshausen-Wilke V, Rottman M, Sondern K, Angelkort B: Therapy of severe diabetic ketoacidosis: zero-mortality under very-low-dose insulin application. *Diabetes Care* 22:674–677, 1999
275. Kitabchi AE, Umpierrez GE, Murphy MB, Barrett EJ, Kreisberg RA, Malone JL, Wall BM: Management of hyperglycemic crises in patients with diabetes. *Diabetes Care* 24:131–153, 2001
276. Gill GV, Sherif IH, Alberti KG: Management of diabetes during open heart surgery. *Br J Surg* 68:171–172, 1981
277. Alberti KG, Gill GV, Elliot MJ: Insulin delivery during surgery in the diabetic patient. *Diabetes Care* 5 (Suppl. 1):65–67, 1982
278. Thomas DJ, Platt HS, Alberti KG: Insulin-dependent diabetes during the perioperative period: an assessment of continuous glucose-insulin-potassium infusion, and traditional treatment. *Anaesthesia* 39:629–637, 1984
279. Husband DJ, Thai AC, Alberti KG: Management of diabetes during surgery with glucose-insulin-potassium infusion. *Diabet Med* 3:69–74, 1986
280. Watts NB, Gebhart SSP, Clark RV, Phillips LS: Postoperative management of diabetes mellitus: steady-state glucose control with bedside algorithm for insulin adjustment. *Diabetes Care* 10:722–728, 1987
281. Pezzarossa A, Taddei F, Cimicchi MC, Rossini E, Contini S, Bonora E, Gnudi A, Uggeri E: Perioperative management of diabetic subjects: subcutaneous versus intravenous insulin administration during glucose-potassium infusion. *Diabetes Care* 11:52–58, 1988
282. Hirsch IB, McGill JB: Role of insulin in management of surgical patients with diabetes mellitus. *Diabetes Care* 13:980–991, 1990
283. Alberti KG: Diabetes and surgery. *Anesthesiology* 74:209–211, 1991
284. Mantha S, Rao SM: Peri-operative management of diabetes mellitus. *Anaesthesia* 46:900, 1991
285. Gavin LA: Perioperative management of the diabetic patient. *Endocrin Metab Clin North Am* 21:457–475, 1992
286. Schiff RL, Emanuele MA: The surgical patient with diabetes mellitus: guidelines for management. *J Gen Intern Med* 10:154–161, 1995
287. Gill GV, Alberti KGMM: The care of the diabetic patient during surgery. In *International Textbook of Diabetes Mellitus*. Alberti KGMM, Zimmet P, Keen H, DeFronzo RA, Eds. Chichester, Wiley, 1992, p. 1173–1183
288. Avilés-Santa L, Raskin P: Surgery and anesthesia. In *Therapy for Diabetes Mellitus and Related Disorders*. 3rd ed. Lebovitz HE, Ed. Alexandria, VA, ADA, 1998, p. 224–233
289. Surgery. In *Medical Management of Type 1 Diabetes*. Kelley DB, Ed. Alexandria, VA, ADA, 1998, p. 159–163
290. Ahmann A: Comprehensive management of the hospitalized patient with diabetes. *Endocrinologist* 8:250–259, 1998
291. Hill A: Continuous intravenous insulin infusion in patients with diabetes after cardiac surgery. *Clin Nurse Spec* 16:93–95, 2002
292. Mitta B: Potassium, glucose, and insulin in treatment of myocardial infarction. *Lancet* 2:607–609, 1965
293. Hendra TJ, Yudkin JS: An algorithm for tight glycaemic control in diabetic infarct survivors. *Diabetes Res Clin Pract* 16:213–220, 1992
294. Malmberg KA, Efendic S, Ryden LE: Feasibility of insulin-glucose infusion in diabetic patients with acute myocardial infarction. *Diabetes Care* 17:1007–1014, 1994
295. Fath-Ordoubadi F, Beatt KJ: Glucose-insulin-potassium therapy for treatment of acute myocardial infarction: an overview of randomized placebo-controlled trials. *Circulation* 96:1152–1156, 1997
296. Kjellman UW, Bjork K, Dahlin A, Ekroth R, Kirno K, Svensson G, Wernerman J: Insulin (GIK) improves myocardial metabolism in patients during blood cardioplegia. *Scand Cardiovasc J* 34:321–330, 2000
297. Braithwaite S: Detection and management of diabetes mellitus during glucocorticoid therapy of nonendocrine disease. In *Endocrine Replacement Therapy in Clinical Practice*. Meikle AW, Ed. Totowa, NJ, Humana Press, 2003, p. 251–282
298. Hirsch IB, Paaup DS, Brunzell J: Inpatient management of adults with diabetes. *Diabetes Care* 18:870–878, 1995
299. McWilliam DB: The practical management of glucose-insulin infusions in the intensive care patient. *Intensive Care Med* 6:133–135, 1980
300. Woolfson AM: Control of blood glucose during nutritional support in ill patients. *Intensive Care Med* 7:11–14, 1980
301. Brown G, Dodek P: Intravenous insulin nomogram improves blood glucose control in the critically ill. *Crit Care Med* 29:1714–1719, 2001
302. White NH, Skor D, Santiago JV: Practical close-loop insulin delivery: a system for the maintenance of overnight euglycemia and the calculation of basal insulin requirements in insulin-dependent diabetics. *Ann Intern Med* 97:210–213, 1982
303. Mao CS, Riegelhuth ME, Van Gundy D, Cortez C, Melendez S, Ipp E: An overnight insulin infusion algorithm provides morning normoglycemia and can be used to predict insulin requirements in noninsulin-dependent diabetes mellitus. *J Clin Endocrinol Metab* 82:2466–2470, 1997
304. Hawkins JB, Jr., Morales CM, Shipp JC: Insulin requirement in 242 patients with type II diabetes mellitus. *Endocr Pract* 1:385–389, 1995
305. Hemmerling TM, Schmid MC, Schmidt J, Kern S, Jacobi KE: Comparison of a continuous glucose-insulin-potassium infusion versus intermittent bolus application of insulin on perioperative glucose control and hormone status in insulin-treated type 2 diabetics. *J Clin Anesth* 13:293–300, 2001
306. Hirsch IB, Paaup DS: Diabetes management in special situations. *Endocr Metab Clin North Am* 26:631–645, 1997
307. Quevedo SF, Sullivan E, Kington R, Rogers W: Improving diabetes care in the hospital using guideline-directed orders. *Diabetes Spectrum* 14:226–233, 2001
308. Peterson L, Caldwell J, Hoffman J: Insulin adsorbance to polyvinylchloride surfaces with implications for constant-infusion therapy. *Diabetes* 25:72–74, 1976
309. Turner RC, Grayburn JA, Newman GB: Measurement of the insulin delivery rate in man. *J Clin Endocrinol Metab* 33:279–286, 1971
310. Clumbeck N, Detroyer A, Naeije R: Small intravenous insulin boluses in the treatment of diabetic coma. *Lancet* 2:416, 1975
311. Dunnett M, Steemson J, Sear JW, Turner RC, Holman RR: Rapid restoration of normoglycaemia using intravenous insulin boluses. *Diabetes Res* 15:151–155, 1990
312. Beyer J, Krause U, Dobronz A, Fuchs B.



- Delver JR, Wagner R: Assessment of insulin needs in insulin-dependent diabetics and healthy volunteers under fasting conditions. *Horm Metab Res* 24 (Suppl.): 71–77, 1990
313. Mookan M, Gerich JE: A simple insulin infusion algorithm for establishing and maintaining overnight near-normoglycemia in type I and type II diabetes. *J Clin Endocrinol Metab* 74:943–945, 1992
314. Markovitz L, Wiechmann R, Harris N, Hayden V, Cooper J, Johnson G, Harestad R, Calkins L, Braithwaite SS: Description and evaluation of a glycemic management protocol for diabetic patients undergoing heart surgery. *Endocr Pract* 8:10–18, 2002
315. Latham R, Lancaster AD, Covington JF, Pirolo JS, Thomas CS: The association of diabetes and glucose control with surgical-site infections among cardiothoracic surgery patients. *Infect Control Hosp Epidemiol* 22:607–612, 2001
316. Carson JL, Scholz PM, Chen AY, Peterson ED, Gold J, Schneider SH: Diabetes mellitus increases short-term mortality and morbidity in patients undergoing coronary artery bypass graft surgery. *J Am Coll Cardiol* 40:418–423, 2002
317. Metchick LN, Petit WA, Jr., Inzucchi SE: Inpatient management of diabetes mellitus. *Am J Med* 113:317–323, 2002
318. Mitka M: Rethinking treatment for patients with diabetes and cardiovascular disease. *JAMA* 287:2488–2491, 2002
319. Szabo Z, Hakanson E, Svedjeholm R: Early postoperative outcome and medium-term survival in 540 diabetic and 2239 nondiabetic patients undergoing coronary artery bypass grafting. *Ann Thorac Surg* 74:712–719, 2002
320. *Intensive Diabetes Management*. 2nd ed. Alexandria, VA, ADA, 1998
321. Etzweiler DD: Diabetes transition: a blueprint for the future. *Diabetes Care* 17: 1–4, 1994
322. Institute of Medicine: *Crossing the Quality Chasm: A New Health System for the 21st Century*. Washington, D.C., Academia Press, 2001
323. Etzweiler DD: Don't ignore the patients. *Diabetes Care* 24:1840–1841, 2001
324. Peterson CM, Forhan SE, Jones RL: Self-management: an approach to patients with insulin dependent diabetes mellitus. *Diabetes Care* 3:82–87, 1980
325. Greenfield S, Kaplan SH, Ware JE Jr, Yano EM, Frank HJ: Patients' participation in medical care: effects on blood sugar control and quality of life in diabetes. *J Gen Intern Med* 3:448–457, 1988
326. The Diabetes Control and Complications Trial Research Group (DCCT): The effect of intensive treatment of diabetes on the development and progression of long-term complications in insulin-dependent diabetes mellitus. *N Engl J Med* 329:977–986, 1993
327. Bode BW, Steed RD, Davidson PC: Reduction in severe hypoglycemia with long-term continuous subcutaneous insulin infusion in type 1 diabetes. *Diabetes Care* 19:324–327, 1996
328. Rudolph JW, Hirsch IB: Assessment of therapy with continuous subcutaneous insulin infusion in an academic diabetes clinic. *Endocrine Practice* 8:401–405, 2002
329. Anderson JH, Brunelle RL, Keohane P, Koivisto VA, Trautmann ME, Vignati L, DiMarchi R: Mealtime treatment with insulin analog improves postprandial hyperglycemia and hypoglycemia in patients with non-insulin-dependent diabetes mellitus. *Arch Intern Med* 157:1249–1255, 1997
330. Anderson JH, Brunelle RL, Koivisto VA, Pfützner A, Trautmann ME, Vignati L, DiMarchi R: Reduction of postprandial hyperglycemia and frequency of hypoglycemia in IDDM patients on insulin-analog treatment. *Diabetes* 46:265–270, 1997
331. Lindholm A, McEwen J, Riis AP: Improved postprandial glycemic control with insulin aspart. *Diabetes Care* 22: 801–805, 1999
332. Raskin P, Guthrie RA, Leiter L, Riis A, Jovanovic L: Use of insulin aspart, a fast-acting insulin analog, as the mealtime insulin in the management of patients with type 1 diabetes. *Diabetes Care* 23: 583–588, 2000
333. Pieber TR, Eugene-Jolchine IE, Derobert E: Efficacy and safety of HOE 901 versus NPH insulin in patients with type 1 diabetes. *Diabetes Care* 23:157–162, 2000
334. Ratner RE, Hirsch IB, Neifing JL, Garg SK, Mecca TE, Wilson CA: Less hypoglycemia with insulin glargine in intensive insulin therapy for type 1 diabetes. *Diabetes Care* 23:639–643, 2000
335. Hermansen K, Madsbad S, Perrild H, Kristensen A, Azelsen M: Comparison of the soluble basal insulin analog insulin detemir with NPH insulin: a randomized open crossover trial in type 1 diabetic subjects on basal-bolus therapy. *Diabetes Care* 24:296–301, 2001
336. Rosenstock J, Schwartz S, Clark C, Park G, Donley D, Edwards M: Basal insulin therapy in type 2 diabetes: 28-week comparison of insulin glargine (HOE 901) and NPH insulin. *Diabetes Care* 24: 631–636, 2001
337. Rosenstock J, Park G, Zimmerman J: Basal insulin glargine (HOE 901) versus NPH insulin in patients with type 1 diabetes on multiple daily insulin regimens. *Diabetes Care* 23:1137–1142, 2000
338. Pfützner A, Kustner E, Forst T, Schultze-Schleppinghoff B, Trautmann ME, Haslbeck M, Schatz H, Beyer J: Intensive insulin therapy with insulin lispro in patients with type 1 diabetes reduces the frequency of hypoglycemia episodes. *Exp Clin Endocrinol Diabetes* 104:25–30, 1996
339. Zinman B, Tildesley H, Chiasson J-L, Tsui E, Strack T: Insulin lispro in CSII: results of a double-blind crossover study. *Diabetes* 46:440–443, 1997
340. Renner R, Pfützner A, Trautmann M, Harzer O, Sauter K, Landgraf R: Use of insulin lispro in continuous subcutaneous insulin infusion treatment: results of a multicenter trial. *Diabetes Care* 784–788, 1999
341. Warshaw HS, Bolderman KM: Advanced carbohydrate counting. In *Practical Carbohydrate Counting: A How-to-Teach Guide for Health Professionals*. Alexandria, VA, ADA, 2001, p. 26–28
342. DAFNE Study Group: Training in flexible, intensive insulin management to enable dietary freedom in people with type 1 diabetes: dose adjustment for normal eating (DAFNE) randomised controlled trial. *BMJ* 325:746, 2002
343. Malouf R, Brust JC: Hypoglycemia: causes, neurological manifestations, and outcome. *Ann Neurol* 17:421–430, 1985
344. Unger RH: Nocturnal hypoglycemia in aggressively controlled diabetes. *N Engl J Med* 306:1294, 1982
345. Ben-Ami H, Nagachandran P, Mendelson A, Edoute Y: Drug-induced hypoglycemic coma in 102 diabetic patients. *Archives of Internal Medicine* 159:281–284, 1999
346. Weston PJ, Gill GV: Is undetected autonomic dysfunction responsible for sudden death in Type 1 diabetes mellitus? The “dead in bed” syndrome revisited. *Diabet Med* 16:626–631, 1999
347. Cryer PE: Hypoglycaemia: the limiting factor in the glycaemic management of type I and type II diabetes. *Diabetologia* 45:937–948, 2002
348. Shilo S, Berezovsky S, Friedlander Y, Sonnenblick M: Hypoglycemia in hospitalized nondiabetic older patients. *J Am Geriatr Soc* 46:978–982, 1998
349. Fischer KF, Lees JA, Newman JH: Hypoglycemia in hospitalized patients. *N Engl J Med* 315:1245–1250, 1986
350. Gaster B, Hirsch IB: Sliding scale insulin use and rates of hyperglycemia. *Arch Intern Med* 158:95, 1998
351. Young M: Hypoglycaemia; a nursing care study. *Nurs Times* 66:915–916, 1970
352. Stock PL: Action stat! Insulin shock. *Nursing* 15:53, 1985
353. Macheca MK: Diabetic hypoglycemia: how to keep the threat at bay. *Am J Nurs* 93:26–30, 1993



354. Arbour R: Acute hypoglycemia. *Nursing* 24:33, 1994
355. Swithers C: Avoiding hypoglycemia (comment). *Nursing* 24:4,6, 1994
356. Parker C: Responding quickly to hypoglycemia. *Am J Nurs* 94:46, 1994
357. Schaller J, Welsh JR: Myths & facts about diabetic hypoglycemia. *Nursing* 24:67, 1994
358. Peragallo-Dittko V: Diabetes 2000: acute complications. *RN* 58:36–41, 1995
359. Reising DL: Acute hypoglycemia: keeping the bottom from falling out. *Nursing* 25:41–48, 1995
360. Watters JM, Kirkpatrick SM, Hopbach D, Norris SB: Aging exaggerates the blood glucose response to total parenteral nutrition. *Can J Surg* 39:481–485, 1996
361. Bjerke HS, Shabot MM: Glucose intolerance in critically ill surgical patients: relationship to total parenteral nutrition and severity of illness. *Am Surg* 58:728–731, 1992
362. Rosmarin DK, Wardlaw GM, Mirtallo J: Hyperglycemia associated with high, continuous infusion rates of total parenteral nutrition dextrose. *Nutr Clin Pract* 11:151–156, 1996
363. Park RH, Hansell DT, Davidson LE, Henderson G, Legge V, Gray GR: Management of diabetic patients requiring nutritional support. *Nutrition* 8:316–320, 1992
364. Woolfson AM: An improved method for blood glucose control during nutritional support. *J Parenter Enteral Nutr* 5:436–440, 1981
365. Sajbel TA, Dutro MP, Radway PR: Use of separate insulin infusions with total parenteral nutrition. *J Parenter Enteral Nutr* 11:97–99, 1987
366. Hollingdal M, Juhl CB, Dall R, Sturis J, Veldhuis JD, Schmitz O, Porksen N: Glucocorticoid induced insulin resistance impairs basal but not glucose entrained high-frequency insulin pulsatility in humans. *Diabetologia* 45:49–55, 2002
367. Boyle PJ: Cushing's disease, glucocorticoid excess, glucocorticoid deficiency, and diabetes. *Diabetes Reviews* 1:301, 1993
368. Lambillotte C, Gilon P, Henquin JC: Direct glucocorticoid inhibition of insulin secretion: an in vitro study of dexamethasone effects in mouse islets. *J Clin Invest* 99:414–423, 1997
369. Dimitriadis G, Leighton B, Parry-Billings M, Sasson S, Young M, Krause U, Bevan S, Piva T, Wegener G, Newsholme EA: Effects of glucocorticoid excess on the sensitivity of glucose transport and metabolism to insulin in rat skeletal muscle. *Biochem J* 321:707–712, 1997
370. Shamoon H, Soman V, Sherwin RS: The influence of acute physiological increments of cortisol on fuel metabolism and insulin binding to monocytes in normal humans. *J Clin Endocrinol Metab* 50:495–501, 1980
371. Wachtel TJ, Tetu-Mouradjian LM, Goldman DL, Ellis SE, O'Sullivan PS: Hyperosmolarity and acidosis in diabetes mellitus: a three-year experience in Rhode Island. *J Gen Intern Med* 6:495–502, 1991
372. Willi SM, Kennedy A, Brant BP, Wallace P, Rogers NL, Garvey WT: Effective use of thiazolidinediones for the treatment of glucocorticoid-induced diabetes. *Diabetes Res Clin Pract* 58:87–96, 2002
373. Ravina A, Slezak L, Mirsky N, Bryden NA, Anderson RA: Reversal of corticosteroid-induced diabetes mellitus with supplemental chromium. *Diabet Med* 16:164–167, 1999
374. Coulston AM: Enteral nutrition in the patient with diabetes mellitus. *Curr Opin Clin Nutr Metab Care* 3:11–15, 2000
375. Haddad RY, Thomas DR: Enteral nutrition and enteral tube feeding: review of the evidence. *Clin Geriatr Med* 18:867–881, 2002
376. Sanz-Paris A, Calvo L, Guallard A, Salazar I, Alberro R: High-fat versus high-carbohydrate enteral formulae: effect on blood glucose, C-peptide, and ketones in patients with type 2 diabetes treated with insulin or sulfonylurea. *Nutrition* 14:840–845, 1998
377. Peters AL, Davidson MB, Isaac RM: Lack of glucose elevation after simulated tube feeding with a low-carbohydrate, high-fat enteral formula in patients with type I diabetes. *Am J Med* 87:178–182, 1989
378. Craig LD, Nicholson S, SilVerstone FA, Kennedy RD: Use of a reduced-carbohydrate, modified-fat enteral formula for improving metabolic control and clinical outcomes in long-term care residents with type 2 diabetes: results of a pilot trial. *Nutrition* 14:529–534, 1998
379. Levetan CS, Salas JR, Wilets IF, Zumoff B: Impact of endocrine and diabetes team consultation on hospital length of stay for patients with diabetes. *Am J Med* 99:22–28, 1995
380. Koproski J, Pretto Z, Poretsky L: Effects of an intervention by a diabetes team in hospitalized patients with diabetes. *Diabetes Care* 20:1553–1555, 1997
381. Levetan CS, Passaro MD, Jablonski KA, Ratner RE: Effect of physician specialty on outcomes in diabetic ketoacidosis. *Diabetes Care* 22:1790–1795, 1999
382. Rafoth RJ: Standardizing sliding scale insulin orders. *Am J Med Qual* 17:175–178, 2002
383. Grol R, Dalhuijsen J, Thomas S, Veld C, Rutten G, Mokkink H: Attributes of clinical guidelines that influence use of guidelines in general practice: observational study. *Brit Med J* 317:858–861, 1998
384. Leape LL, Brennan TA, Laird N, Lawthers AG, Localio AR, Barnes BA, Hebert L, Newhouse JP, Weiler PC, Hiatt H: The nature of adverse events in hospitalized patients: results of the Harvard Medical Practice Study II. *N Engl J Med* 324:377–384, 1991
385. Leape LL: Error in medicine. *JAMA* 272:1851–1857, 1994
386. Lesar TS, Lomaestro BM, Pohl H: Medication-prescribing errors in a teaching hospital: a 9-year experience. *Arch Intern Med* 157:1569–1576, 1997
387. Chassin MR: Is health care ready for Six Sigma quality? *Milbank Quarterly* 76:565–591, 1998
388. Berwick DM, Leape LL: Reducing errors in medicine. *Brit Med J* 318:136–137, 1999
389. Richardson WC, Berwick DM, Bisgard JC: The institute of medicine report on medical errors. *N Engl J Med* 343:663–664, 2000
390. Alberti KGMM: Medical errors: a common problem—it is time to get serious about them. *Brit Med J* 322:501–502, 2001
391. Cohen MR, Proulx SM, Crawford SY: Survey of hospital systems and common serious medication errors. *J Health Risk Manag* 18:16–27, 1998
392. Institute of Medicine, Committee on Quality of Health Care in America: *To Err Is Human: Building a Safer Health System*. Kohn LT, Corrigan JM, Donaldson MS, Eds. Washington, D.C., National Academy Press, 1999
393. Cohen MR: *Medication Errors*. Washington, D.C., Institute for Safe Medication Practices, American Pharmaceutical Association, 1999
394. Bates DW: Unexpected hypoglycemia in a critically ill patient. *Ann Intern Med* 137:110–116, 2002
395. Piotrowski MM, Hinshaw DB: The safety checklist program: creating a culture of safety in intensive care units. *Jt Comm J Qual Improv* 28:306–315, 2002
396. Adlersberg MA, Fernando S, Spollett GR, Inzucchi SE: Glargine and lispro: two cases of mistake identity. *Diabetes Care* 25:404–405, 2002
397. Ragone M, Lando H: Errors of insulin commission? *Clin Diabetes* 20:221–222, 2002
398. Crowe DJ: The American Diabetes Association should be a leader in reducing medication errors (Letter). *Diabetes Care* 24:1841, 2001
399. Phelps MR, White SJ: The pharmacist's role in a team approach for diabetic patient education. *Hospital Pharmacy* 12:78–80, 1977

400. Hawkins DW, Fiedler FP, Douglas HL, Eschbach RC: Evaluation of a clinical pharmacist in caring for hypertensive and diabetic patients. *Am J Hosp Pharm* 36:1321-1325, 1979
401. Huff PS, Ives TJ, Almond SN, Griffin NW: Pharmacist-managed diabetes education service. *Am J Hosp Pharm* 40:991-994, 1983
402. Ponte CD: Monitoring the patient with diabetes mellitus: how to avoid medication errors. *Hospital Pharm* 24:280-283, 1989
403. Brient K: Barcoding facilitates patient-focused care. *Healthc Inform* 12:38, 40, 42, 1995
404. Leape LL, Cullen DJ, Clapp MD, Burdick E, Demonaco HJ, Erickson JI, Bates DW: Pharmacist participation on physician rounds and adverse drug events in the intensive care unit. *JAMA* 282:267-270, 1999
405. Hanish LR: Standardizing regimens for sliding-scale insulin. *Am J Health System Pharm* 54:1046-1047, 1997
406. Achtmeyer CE, Payne TH, Anawalt BD: Computer order entry system decreased use of sliding scale insulin regimens. *Meth Inform Med* 41:277-281, 2002
407. Spenney JG, Eure CA, Kreisberg RA: Hyperglycemic, hyperosmolar, nonketacidotic diabetes: a complication of steroid and immunosuppressive therapy. *Diabetes* 18:107-110, 1969
408. Ivanova II, Vasiutkova LA, Ivanov VA: Hyperglycemic coma after corticosteroid therapy. *Sovetskaia Meditsina* 10:112-113, 1984
409. Bouhanick B, Biquard F, Hadjadj S, Roques MA: Does treatment with antenatal glucocorticoids for the risk of premature delivery contribute to ketoacidosis in pregnant women with diabetes who receive continuous subcutaneous insulin infusion (CSII)? *Arch Intern Med* 160:242-243, 2000
410. Brocard H, Akoun G, Grand A: Diabète stéroïde compliqué d'un coma de type hyperosmolaire. *Bulletins et Mémoires de la Société Médicale des Hôpitaux de Paris* 116:353-363, 1965
411. Kumar RS: Hyperosmolar non-ketotic coma. *Lancet* 1:48-49, 1968
412. Pyörälä K, Suhonen O, Pentikäinen P: Steroid therapy and hyperosmolar nonketotic coma. *Lancet* 1:596-597, 1968
413. Szewczyk Z, Ratajczyk T, Rabczynski J: Hyperosmotic coma in steroid-induced diabetes complicating subacute glomerulonephritis in a 16-year-old boy. *Polski Tygodnik Lekarski* 26:1988-1990, 1971
414. Woods JE, Zincke H, Palumbo PJ, Johnson WJ, Anderson CF, Frohnert PP, Service FJ: Hyperosmolar nonketotic syndrome and steroid diabetes. *JAMA* 231:1261-1263, 1975
415. Fujikawa LS, Meisler DM, Nozik RA: Hyperosmolar hyperglycemic nonketotic coma. *Ophthalmology* 90:1239-1242, 1983
416. Winterstein AG, Hatton RC, Gonzalez-Rothi R, Johns TE, Segal R: Identifying clinically significant preventable adverse drug events through a hospital's database of adverse drug reaction reports. *Am J Health System Pharm* 59:1742-1749, 2002
417. Stagnaro-Green A, Barton M, Linekin P, Corkery E, deBeer K, Roman S: Mortality in hospitalized patients with hypoglycemia and severe hyperglycemia. *Mount Sinai J Med* 62:422-426, 1995
418. Roman SH, Linekin PL, Stagnaro-Green A: An inpatient diabetes QI program. *Jt Comm J Qual Improv* 21:693-699, 1995
419. Roman SH, Chassin MR: Windows of opportunity to improve diabetes care when patients with diabetes are hospitalized for other conditions. *Diabetes Care* 24:1371-1376, 2001
420. Gilman JA: A quality improvement project for better glycemic control in hospitalized patients with diabetes. *Diabetes Educ* 27:541-546, 2001
421. National health promotion and disease prevention objectives, full report with commentary. In *Healthy People 2000*. Boston, MA, Jones and Bartlett, 1992, p. 462
422. Muhlhauser I, Bruckner I, Berger M, Cheta D, Jorgens V, Ionescu-Tirgoviste C, Scholz V, Mincu I: Evaluation of an intensified insulin treatment and teaching programme as routine management of type 1 (insulin-dependent) diabetes: the Bucharest-Dusseldorf Study. *Diabetologia* 30:681-690, 1987
423. Feddersen E, Lockwood DH: An inpatient diabetes educator's impact on length of hospital stay. *Diabetes Educ* 20:125-128, 1994
424. Wood ER: Evaluation of a hospital-based education program for patients with diabetes. *J Am Diet Assoc* 89:354-358, 1989
425. Shorr RI, Ray WA, Daugherty JR, Griffin MR: Incidence and risk factors for serious hypoglycemia in older persons using insulin or sulfonylureas. *Arch Intern Med* 157:1681-1686, 1997
426. Shorr RI, Ray WA, Daugherty JR, Griffin MR: Individual sulfonylureas and serious hypoglycemia in older people. *J Am Geriatr Soc* 44:751-755, 1996
427. American Diabetes Association: Translation of the diabetes nutrition recommendations for health care institutions. *Diabetes Care* 20:106-108, 1997
428. Schafer RG, Bohannon B, Franz M, Freeman J, Holmes A, McLaughlin S, Haas LB, Kruger DF, Lorenz RA, McMahon MM: Translation of the diabetes nutrition recommendations for health care institutions. *Diabetes Care* 20:96-105, 1997
429. McMahon MM, Rizza RA: Nutrition support in hospitalized patients with diabetes mellitus. *Mayo Clin Proc* 71:587-594, 1996
430. American Diabetes Association: Evidence-based nutrition principles and recommendations for the treatment and prevention of diabetes and related complications (Position Statement). *Diabetes Care* 26 (Suppl. 1):S51-S61, 2003
431. Paddock BW: Carbohydrate counting in institutions. *Diabetes Spectrum* 13:149-152, 2000
432. Wheeler ML: A brave new world for nutrition and diabetes. *Diabetes Care* 20:109-110, 1997
433. American Diabetes Association: Translation of the diabetes nutrition recommendations for health care institutions (Position Statement). *Diabetes Care* 26 (Suppl. 1):S70-S72, 2003
434. Lewandowski K, Cheek R, Nathan DM, Godine JE, Hurxthal K, Eschenbach K, Laposata M: Implementation of capillary blood glucose monitoring in a teaching hospital and determination of program requirements to maintain quality testing. *Am J Med* 93:419-426, 1992
435. Rumley AG: Improving the quality of near-patient blood glucose measurement. *Ann Clin Biochem* 34 (Pt. 3):281-286, 1997
436. Tang Z, Lee JH, Louie RF, Kost GJ: Effects of different hematocrit levels on glucose measurements with handheld meters for point-of-care testing. *Arch Pathol Lab Med* 124:1135-1140, 2000
437. Atkin SH, Dasmahapatra A, Jaker MA, Chorost MI, Reddy S: Fingertick glucose determination in shock. *Ann Intern Med* 114:1020-1024, 1991
438. Tang Z, Du X, Louie RF, Kost GJ: Effects of drugs on glucose measurements with handheld glucose meters and a portable glucose analyzer. *Am J Clin Pathol* 113:75-86, 2000
439. Nichols JH: A critical review of blood glucose testing. *Point of Care* 2:49-61, 2003
440. Blake D, Nathan DM: Point-of-care testing for diabetes. *Point of Care* 1:155-164, 2002
441. Jain R, Myers TF, Kahn SE, Zeller WP: How accurate is glucose analysis in the presence of multiple interfering substances in the neonate? (Glucose analysis and interfering substances). *J Clin Lab Anal* 10:13-16, 1996
442. Bina DM, Anderson RL, Johnson ML, Bergenstal RM, Kendall DM: Clinical impact of prandial state, exercise, and site preparation on the equivalence of alternative-site blood glucose testing. *Diabetes*

- tes Care 26:981–985, 2003
443. Jones BA, Bachner P, Howanitz PJ: Bed-side glucose monitoring: a College of American Pathologists Q-Probes study of the program characteristics and performance in 605 institutions. *Arch Pathol Lab Med* 117:1080–1087, 1993
  444. *Point of Care Blood Glucose Testing in Acute and Chronic Care Facilities; Approved Guideline*. 2nd ed. Wayne, PA, NCCLS, 2002
  445. American Diabetes Association: Economic costs of diabetes in the U.S. in 2002. *Diabetes Care* 26:917–932, 2003
  446. Jonsson B: Revealing the cost of type II diabetes in Europe. *Diabetologia* 45:S5–S12, 2002
  447. Jiang HJ, Stryer D, Friedman B, Andrews R: Multiple hospitalizations for patients with diabetes. *Diabetes Care* 26:1421–1426, 2003
  448. Selby JV, Ray GT, Zhang D, Colby CJ: Excess costs of medical care for patients with diabetes in a managed care population. *Diabetes Care* 20:1396–1402, 1997
  449. Shojana K, Duncan B, McDonald K: *Making Health Care Safer: A Critical Analysis of Patient Safety Practices*. Evidence Report/Technology Assessment No. 43. Rockville, MD, AHRQ publication no. 01-E058, 2001
